# Supplementary material for: UV light-driven asymmetric vinylogous aldol reaction of isatins with 2-alkylbenzophenones and enantioselective synthesis of 3-hydroxyoxindoles
Source: Royal Society of Chemistry journal article supplement (doi:10.1039/d1qo01555a), 2021-12-07
Supplement: d1qo01555a1.pdf [file d1qo01555a1.pdf]

## *Supporting Information*

# **UV Light-Driven Asymmetric Vinylogous Aldol Reaction of Isatins with 2-Alkylbenzophenones and Enantioselective Synthesis of 3-Hydroxyoxindoles**

Shixuan Cao,<sup>a</sup> Jiatian Li,<sup>a</sup> Taishan Yan,<sup>a</sup> Jie Han,<sup>a,\*</sup> Zhengjie He<sup>a, b,\*</sup>

<sup>a</sup> The State Key Laboratory of Elemento-Organic Chemistry, College of Chemistry, Nankai University, Tianjin 300071, P. R. China.

<sup>b</sup> Collaborative Innovation Center of Chemical Science and Engineering (Tianjin), Tianjin 300071, P. R. China.

E-mail: hanjie@nankai.edu.cn; zhengjiehe@nankai.edu.cn

## **Contents**

|                                                                    |            |
|--------------------------------------------------------------------|------------|
| <b>1. General information .....</b>                                | <b>S2</b>  |
| <b>2. Experimental procedures .....</b>                            | <b>S2</b>  |
| <b>3. Analytical data for catalysts and compounds 3 and 4.....</b> | <b>S6</b>  |
| <b>4. ORTEP drawings of 3a, 3w and 4 .....</b>                     | <b>S19</b> |
| <b>5. NMR spectra .....</b>                                        | <b>S22</b> |
| <b>6. Chiral HPLC data .....</b>                                   | <b>S57</b> |
| <b>7. References .....</b>                                         | <b>S83</b> |

## 1. General information

All reactions were carried out under nitrogen atmosphere and anhydrous conditions. Commercially available chemicals were used directly without further purification. Anhydrous solvents were distilled by conventional procedures prior to use. Flash column chromatography was performed on silica gel (200–300 mesh) using a mixture of petroleum ether (PE)/ethyl acetate (EA) or methanol/ethyl acetate as the eluent.  $^1\text{H}$ ,  $^{13}\text{C}$ ,  $^{19}\text{F}$  NMR spectra were recorded in  $\text{CDCl}_3$  (or  $\text{DMSO-}d_6$ ) on Bruker 400 MHz. For  $^1\text{H}$ ,  $^{13}\text{C}$  NMR spectra, TMS was chosen as an internal standard. For  $^{19}\text{F}$  NMR spectra,  $\text{CFCl}_3$  was set as the external standard. HRMS spectra were obtained on Varian 7.0T FTMS. Specific optical rotations were measured using IP-digi 300 (LED 589 nm) at 25 °C in a 10 cm cell and concentrations were given in g/100 mL. HPLC was recorded on SSI HPLC 1500 equipped with chiral stationary columns from DACIEL (AD-H, OD, AS, IA, IC). UV lamp is a commercially available 3W/365 nm LED. Isatins<sup>[1]</sup>, benzophenones<sup>[2]</sup>, catalysts **C1**<sup>[3]</sup> and **C2**<sup>[4]</sup> were prepared according to the previous reported procedures. Commercially available benzophenones **2a**, **2y** were purchased.

## 2. Experimental procedures

### Synthesis of chiral catalysts<sup>[5]</sup>

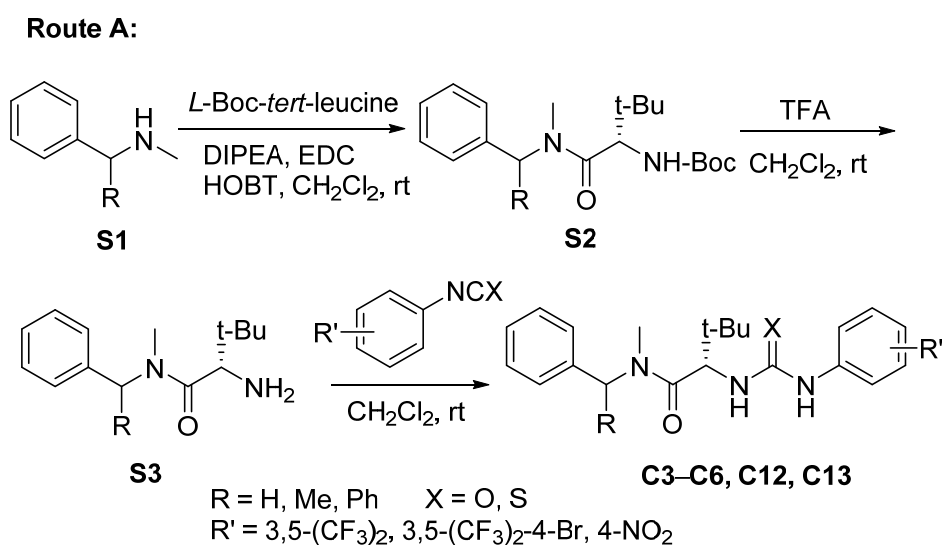

**Route A:** To a stirred solution of amine **S1** (0.7 mL, 5.5 mmol) in  $\text{CH}_2\text{Cl}_2$  (30 mL) were added DIPEA (1.3 mL, 7.5 mmol), 1-hydroxybenzotriazole (HOBT) (0.76 g, 5.5 mmol), 1-ethyl-3-(3-dimethylaminopropyl)carbodiimide hydrochloride (EDC) (1.05 g, 5.5 mmol) and *N*-Boc-*L*-tert-leucine (1.15 g, 5 mmol) in sequence. The resulting mixture was stirred at room temperature for 24 h. It was then diluted with  $\text{Et}_2\text{O}$  (30 mL) and washed with 1N HCl (50 mL), saturated  $\text{NaHCO}_3$  aqueous solution (50 mL), and brine (50 mL) respectively. The organic layer was collected and dried over anhydrous  $\text{Na}_2\text{SO}_4$ . After filtration and removal of solvent and volatile components under reduced pressure, intermediate **S2** was obtained as colorless oil (1.6 g). To a solution of **S2** (0.80 g) in  $\text{CH}_2\text{Cl}_2$  (15 mL) was added trifluoroacetic acid (3 mL). After the

resulting mixture was stirred at rt for 2 h, it was quenched with saturated Na<sub>2</sub>CO<sub>3</sub> aqueous solution (10 mL) and extracted with CH<sub>2</sub>Cl<sub>2</sub> (12 mL × 3). The organic layers were combined and dried over Na<sub>2</sub>SO<sub>4</sub>. After filtration and removal of solvent and volatile components under reduced pressure, intermediate **S3** was obtained as pale-yellow oil. Without further purification, **S3** was then mixed with CH<sub>2</sub>Cl<sub>2</sub> (5 mL), triethylamine (0.75 mL, 5 mmol) and isothiocyanate or isocyanate (1 mL, excessive). The resulting mixture was stirred at rt overnight. After removal of solvent and volatile components under reduced pressure, the crude product was subjected to column chromatography isolation (PE: EA = 3:1–1:1) to give the catalysts **C3–C6**, **C12** and **C13**. Catalysts **C8–C11** were also prepared from the corresponding secondary amines by similar procedures.

**Route B:**

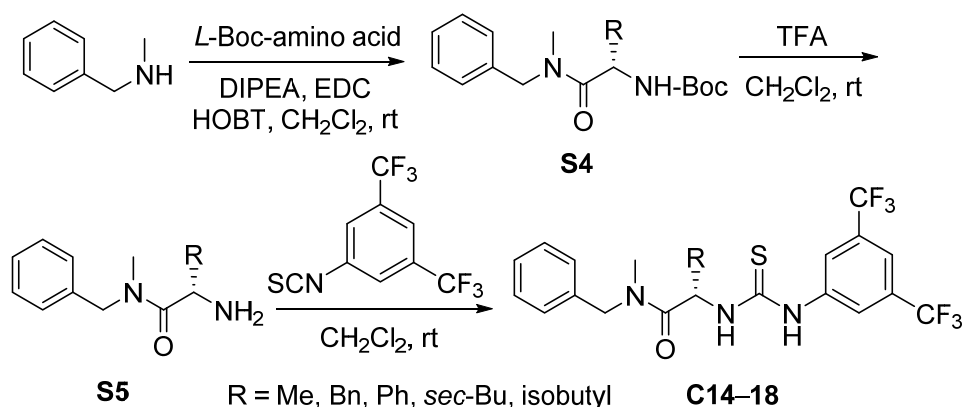

**Route B:** To a stirred solution of *N*-methyl benzylamine (0.7 mL, 5.5 mmol) in CH<sub>2</sub>Cl<sub>2</sub> (30 mL) were added DIPEA (1.3 mL, 7.5 mmol), HOBT (0.76 g, 5.5 mmol), EDC (1.05g, 5.5 mmol), and *N*-Boc-*L*-amino acid (5 mmol) in sequence. The resulting mixture was stirred at rt for 24 h. It was then diluted with Et<sub>2</sub>O (30 mL) and washed with 1*N* HCl (50 mL), saturated NaHCO<sub>3</sub> aqueous solution (50 mL) and brine (50 mL), respectively. The organic layer was dried over Na<sub>2</sub>SO<sub>4</sub>. After filtration and concentration under reduced pressure, intermediate **S4** as colorless oil or white solid was obtained. To a solution of **S4** (0.8 g) in CH<sub>2</sub>Cl<sub>2</sub> (15 mL) was added trifluoroacetic acid (3 mL). The resulting mixture was stirred at rt for 2 h. It was then quenched with saturated Na<sub>2</sub>CO<sub>3</sub> aqueous solution (10 mL) and extracted with CH<sub>2</sub>Cl<sub>2</sub> (12 mL × 3). The organic layers were combined and dried over Na<sub>2</sub>SO<sub>4</sub>. After filtration and removal of solvent and volatile components under reduced pressure, intermediate **S5** was collected. Without further purification, **S5** was then mixed with CH<sub>2</sub>Cl<sub>2</sub> (5 mL), triethylamine (0.75 mL) and 3,5-bis(trifluoromethyl)phenyl isothiocyanate (0.9 mL, 5 mmol). The resulting mixture was then stirred at rt overnight. After removal of solvent and volatile components under reduced pressure, the crude product was purified by column chromatography (PE: EA= 3:1–1:1) to give catalysts **C14–C18**.

### Route C:

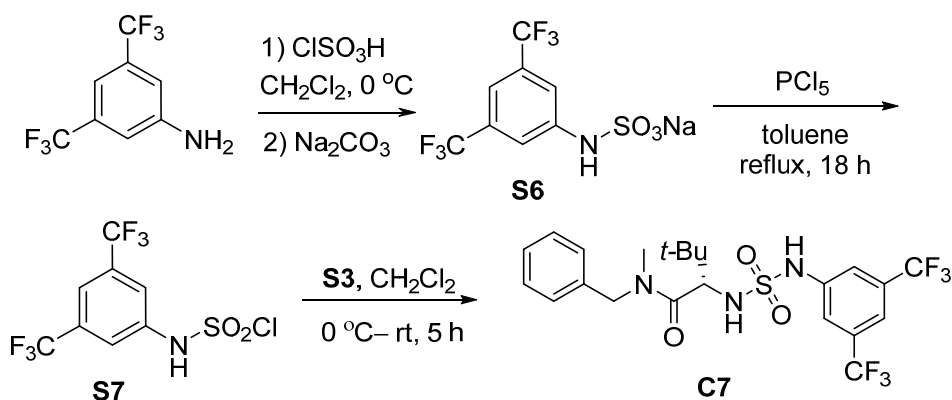

**Route C:** To a solution of 3,5-bis(trifluoromethyl)aniline (1.1 mL, 7.2 mmol) in  $\text{CH}_2\text{Cl}_2$  (5 mL), chlorosulfonic acid (0.16 mL, 2.4 mmol) was dropwise added at  $0\text{ }^\circ\text{C}$  in 20 min by the means of microsyringe, and the resulting reaction mixture was stirred at  $0\text{ }^\circ\text{C}$  for 2 h. A solution of  $\text{Na}_2\text{CO}_3$  (0.381 g, 3.6 mmol) in water (5 mL) was then added to quench the reaction. The aqueous phase was collected and extracted with  $\text{CH}_2\text{Cl}_2$  (10 mL  $\times$  3). Organic layers were discarded. Evaporation of the aqueous phase under reduced pressure brought about a white solid intermediate **S6**, which was used in the next step without further purification.

To a suspension of **S6** (0.92 g, 2.4 mmol) in toluene (5 mL) was added  $\text{PCl}_5$  (0.53 g, 2.4 mmol) and the resulting mixture was heated under reflux with stirring for 18 h. The reaction mixture was then cooled to rt, and was then filtered through a celite pad. The filtrate was concentrated under reduced pressure to dryness to give intermediate **S7** (0.476 g) as a brown solid. Intermediate **S7** (0.50 g, 1.7 mmol) was dissolved in  $\text{CH}_2\text{Cl}_2$  (15 mL) and intermediate **S3** (0.281 g, 1.2 mmol) was added into it at  $0\text{ }^\circ\text{C}$ . The resulting mixture was stirred for 5 h while being naturally warmed to rt. After removal of solvent and volatile components under reduced pressure, the crude product was subjected to column chromatography isolation (PE:EA = 10:1) to give solid catalyst **C7**.

### Screening of catalysts

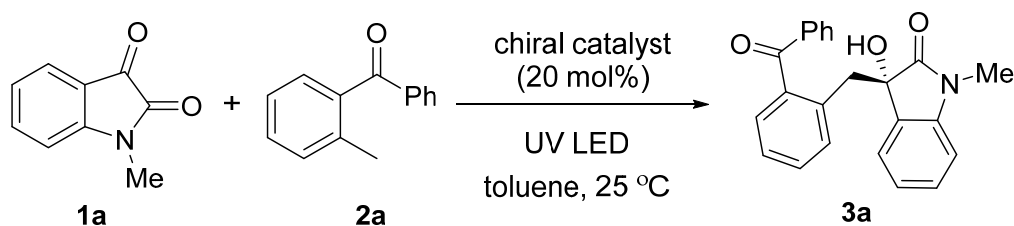

A mixture of **1a** (16 mg, 0.1 mmol) and **2a** (60 mg, 0.3 mmol) and the catalyst (0.02 mmol) in toluene (2.0 mL) was stirred for 2 to 8 h under the irradiation of UV light (365 nm, 3 W) at  $25\text{ }^\circ\text{C}$  until **1a** was completely consumed (monitored by TLC). After removal of solvent and volatile components under reduced pressure, the crude product was subjected to flash column chromatography isolation on silica gel (eluent: PE:EA = 4:1) to give **3a**. The catalyst efficiency was evaluated with regard to yield and enantioselectivity.

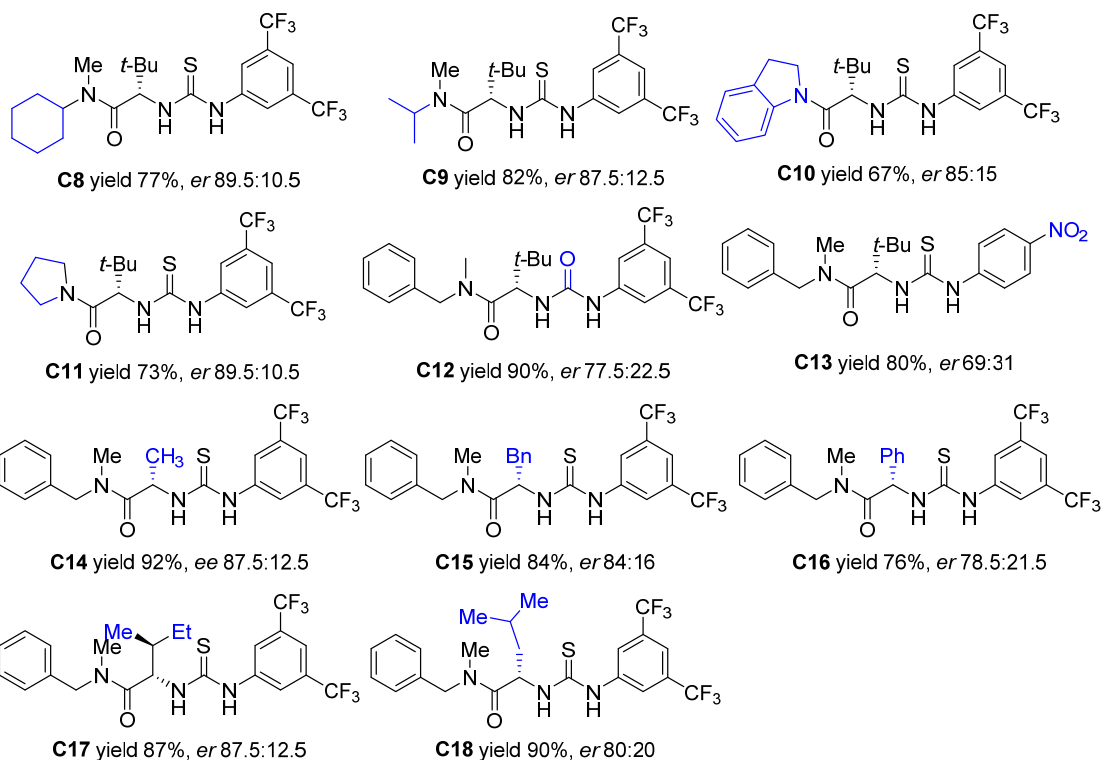

**The aza-aldol reaction of 3-imino oxindole and 2-methylbenzophenone **2a** and synthesis of spirocyclic compound **4**.**

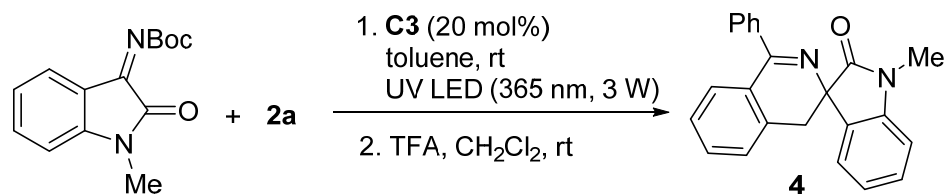

A mixture of 3-imino oxindole (26 mg, 0.1 mmol), **2a** (60 mg, 0.3 mmol), and catalyst **C3** (0.02 mmol) in toluene (2.0 mL) was stirred at rt (25 °C) for 6 h under the irradiation of UV LED light (365 nm, 3 W). Then 1 mL of CH<sub>2</sub>Cl<sub>2</sub> was added into the reaction, followed by the addition of TFA (1 mL). The resulting mixture was stirred at rt for 2 h, and was then quenched by saturated Na<sub>2</sub>CO<sub>3</sub> aqueous solution (2.0 mL). The organic layer was separated and the aqueous layer was extracted with CH<sub>2</sub>Cl<sub>2</sub> (2 mL). The organic layers were combined and dried over Na<sub>2</sub>SO<sub>4</sub>. After filtration and removal of solvent and volatile components under reduced pressure, the residue was subjected to flash column chromatography isolation on silica gel (PE:EA = 5:1). Compound **4** was obtained as a white solid (17 mg, 56% yield).

### 3. Analytical data for catalysts and compounds 3 and 4.

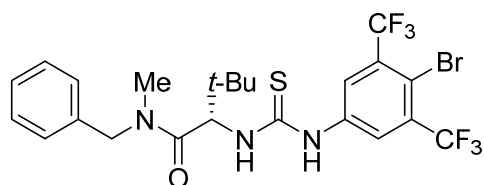

#### (*S*)-*N*-Benzyl-2-(3-(4-bromo-3,5-bis(trifluoromethyl)phenyl)thioureido)-*N*,3,3-trimethylbutanamide (C4)

White solid; 1.45 g, overall 50% yield (PE: EA = 10:1); m.p. 147.4–149.0 °C; 5:1 rotamers; **major rotamer**:  $^1\text{H}$  NMR (400 MHz,  $\text{CDCl}_3$ )  $\delta$  8.85 (br s, 1H), 8.04 – 7.88 (m, 1H), 7.87 (s, 2H), 7.29 (s, 1H), 7.27 – 7.07 (m, 4H), 5.66 (d,  $J = 9.0$  Hz, 1H), 4.94 (d,  $J = 14.4$  Hz, 1H), 4.25 (d,  $J = 14.3$  Hz, 1H), 3.28 (s, 3H), 1.15 (s, 9H).  $^{13}\text{C}$  NMR (101 MHz,  $\text{CDCl}_3$ )  $\delta$  181.6, 173.9, 138.3, 135.4, 132.5 (q,  $J = 31.3$  Hz), 128.7, 128.0, 127.9, 126.4 – 125.6 (m), 122.3 (q,  $J = 274.5$  Hz), 113.2, 61.2, 52.0, 36.67, 36.2, 27.2.  $[\alpha]_{\text{D}}^{25} = -11.0$  ( $c = 0.3$  in  $\text{CHCl}_3$ ). HRMS-ESI: calcd. for  $\text{C}_{23}\text{H}_{24}\text{BrF}_6\text{N}_3\text{OS}$   $[\text{M}+\text{H}]^+$  582.0649, found 582.0652.

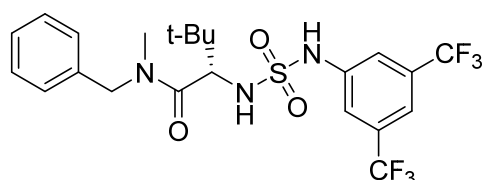

#### (*S*)-*N*-Benzyl-2-((*N*-(3,5-bis(trifluoromethyl)phenyl)sulfamoyl)amino)-*N*,3,3-trimethylbutanamide (C7)

White amorphous solid; 75 mg, 21% yield (PE: EA = 10:1); 4:1 rotamers; **major rotamer**:  $^1\text{H}$  NMR (400 MHz,  $\text{CDCl}_3$ )  $\delta$  8.54 – 8.40 (m, 1H), 7.69 (s, 2H), 7.55 (d,  $J = 4.1$  Hz, 1H), 7.32 – 7.03 (m, 5H), 6.50 – 6.42 (m, 1H), 4.82 (d,  $J = 14.6$  Hz, 1H), 4.21 (d,  $J = 10.2$  Hz, 1H), 4.09 (d,  $J = 14.6$  Hz, 1H), 2.88 (s, 3H), 0.98 (s, 9H).  $^{13}\text{C}$  NMR (101 MHz,  $\text{CDCl}_3$ )  $\delta$  170.7, 138.7, 134.8, 131.5 (q,  $J = 33.5$  Hz), 127.7, 126.9, 126.7, 122.0 (q,  $J = 271.8$  Hz), 118.0 (d,  $J = 4.1$  Hz), 116.3 – 115.8 (m), 58.9, 50.5, 35.0, 34.7, 25.5.  $[\alpha]_{\text{D}}^{25} = +5.67$  ( $c = 0.6$  in  $\text{CHCl}_3$ ). HRMS-ESI: calcd.  $\text{C}_{22}\text{H}_{25}\text{F}_6\text{N}_3\text{O}_3\text{S}$  for  $[\text{M}-\text{H}]^-$  524.1443, found 524.1446.

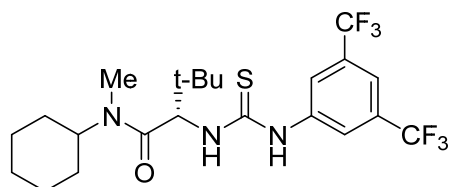

#### (*S*)-2-(3-(3,5-bis(trifluoromethyl)phenyl)thioureido)-*N*-cyclohexyl-*N*,3,3-trimethylbutanamide (C8)

White solid; 1.31 g, overall 53% yield (PE:EA = 10:1); m.p. 201.5–202.3 °C; 1.1:1 rotamers; **major rotamer**:  $^1\text{H}$  NMR (400 MHz,  $\text{CDCl}_3$ )  $\delta$  9.18 (br s, 1H), 8.08 – 7.82 (m, 3H), 7.60 (s, 1H), 5.61 (dd,  $J = 9.1, 2.6$  Hz, 1H), 4.32 (tt,  $J = 11.3, 3.8$  Hz, 1H), 3.15 (s, 3H), 2.01 – 1.69 (m, 4H), 1.66 – 1.54 (m, 2H), 1.50 – 1.23 (m, 4H), 1.12 (s, 9H).  $^{13}\text{C}$  NMR (101 MHz,  $\text{CDCl}_3$ )  $\delta$  181.7, 172.4, 140.0, 131.8 (q,  $J = 33.8$  Hz), 124.5, 121.7, 118.8 – 117.7 (m), 61.5, 54.0, 36.2, 31.1, 29.2,

27.2, 25.5, 25.2.  $[\alpha]_D^{25} = -11.8$  ( $c = 0.6$  in  $\text{CHCl}_3$ ). HRMS-ESI: calcd. for  $\text{C}_{22}\text{H}_{29}\text{F}_6\text{N}_3\text{OS}$   $[\text{M-H}]^-$  496.1857, found 496.1860.

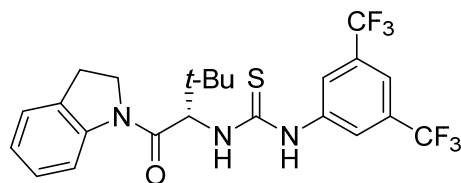

**(S)-1-(3,5-Bis(trifluoromethyl)phenyl)-3-(1-(indolin-1-yl)-3,3-dimethyl-1-oxobutan-2-yl)thiourea (C10)**

White solid; 1.53 g, overall 61% yield (PE: EA = 6:1); m.p. 72.1–74.0 °C; 4:1 rotamers; **major rotamer**:  $^1\text{H}$  NMR (400 MHz,  $\text{CDCl}_3$ )  $\delta$  8.68 (br s, 1H), 8.20 – 8.09 (m, 2H), 7.48 (s, 2H), 7.40 (s, 1H), 7.25 – 7.17 (m, 1H), 7.15 – 6.97 (m, 2H), 5.46 (d,  $J = 9.0$  Hz, 1H), 5.18 – 4.83 (m, 1H), 4.34 – 4.11 (m, 1H), 3.29 – 3.06 (m, 2H), 1.25 (s, 9H).  $^{13}\text{C}$  NMR (101 MHz,  $\text{CDCl}_3$ )  $\delta$  182.0, 172.4, 141.3, 139.6, 132.9, 131.1 (q,  $J = 33.6$  Hz), 127.3, 125.6 (d,  $J = 5.1$  Hz), 123.8 – 123.5 (m), 122.9 (q,  $J = 273.4$  Hz), 118.3 – 117.8 (m), 117.2, 64.0, 49.9, 35.9, 28.0, 27.2.  $[\alpha]_D^{25} = -42.0$  ( $c = 0.1$  in  $\text{CHCl}_3$ ). HRMS-ESI: calcd. for  $\text{C}_{23}\text{H}_{23}\text{F}_6\text{N}_3\text{OS}$   $[\text{M-H}]^-$  502.1388, found 502.1391.

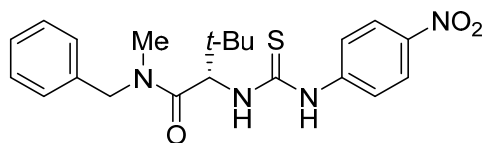

**(S)-N-Benzyl-N,3,3-trimethyl-2-(3-(4-nitrophenyl)thioureido)butanamide (C13)**

Light yellow solid; 1.46 g, overall 71% yield (PE: EA = 10:1); m.p. 81.8–82.3 °C; 3:1 rotamers; **major rotamer**:  $^1\text{H}$  NMR (400 MHz,  $\text{CDCl}_3$ )  $\delta$  9.65 (br s, 1H), 9.08 (br s, 1H), 8.12 (d,  $J = 9.1$  Hz, 2H), 7.75 (d,  $J = 7.7$  Hz, 1H), 7.59 (d,  $J = 9.0$  Hz, 2H), 7.37 – 7.30 (m, 1H), 7.30 – 7.15 (m, 3H), 5.60 (d,  $J = 9.1$  Hz, 1H), 4.80 (d,  $J = 14.6$  Hz, 1H), 4.36 (d,  $J = 14.6$  Hz, 1H), 3.22 (s, 3H), 1.09 (s, 9H).  $^{13}\text{C}$  NMR (101 MHz,  $\text{CDCl}_3$ )  $\delta$  180.9, 173.0, 144.3, 143.9, 135.8, 128.8, 128.7, 127.9, 124.6, 122.6, 60.9, 51.8, 36.6, 36.2, 27.2.  $[\alpha]_D^{25} = +57.3$  ( $c = 0.6$  in  $\text{CHCl}_3$ ). HRMS-ESI: calcd. for  $\text{C}_{21}\text{H}_{26}\text{N}_4\text{O}_3\text{S}$   $[\text{M-H}]^-$  413.1647, found 413.1650.

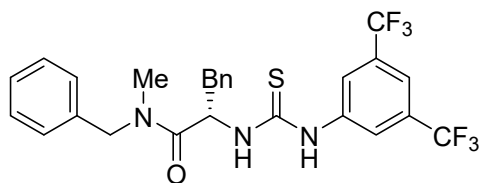

**(S)-N-Benzyl-2-(3-(3,5-bis(trifluoromethyl)phenyl)thioureido)-N-methyl-3-phenylpropanamide (C15)**

White solid. 1.32g, overall 49% yield (PE:EA = 8:1); m.p. 66.5–67.8 °C; 4:1 rotamers; **major rotamer**:  $^1\text{H}$  NMR (400 MHz,  $\text{CDCl}_3$ )  $\delta$  9.23 (br s, 1H), 8.87 (br s, 1H), 7.97 (d,  $J = 3.8$  Hz, 2H), 7.43 (s, 1H), 7.38–7.28 (m, 5H), 7.28–7.26 (m, 1H), 7.19–7.08 (m, 4H), 5.59 – 5.47 (m, 1H), 4.93 – 4.82 (m, 1H), 4.36 – 4.24 (m, 1H), 3.34 – 3.16 (m, 2H), 2.92 (d,  $J = 4.0$  Hz, 3H).  $^{13}\text{C}$  NMR (101 MHz,  $\text{CDCl}_3$ )  $\delta$  181.6, 174.9, 140.0, 135.4 (d,  $J = 7.6$  Hz), 130.9 (q,  $J = 33.4$  Hz), 129.3, 128.9, 128.7, 127.6, 127.5, 124.2, 123.1 (q,  $J = 272.6$  Hz), 117.8 (dd,  $J = 7.0, 3.4$  Hz), 56.6, 52.3, 38.7, 35.2.  $[\alpha]_D^{25} = +7.33$  ( $c = 0.3$  in  $\text{CHCl}_3$ ). HRMS-ESI: calcd. for  $\text{C}_{26}\text{H}_{23}\text{F}_6\text{N}_3\text{OS}$   $[\text{M-H}]^-$  538.1388, found 538.1391.

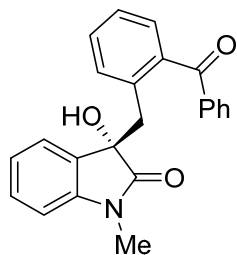

**(S)-3-(2-Benzoylbenzyl)-3-hydroxy-1-methylindolin-2-one (3a)**

White solid; 29 mg, 82% yield (PE:EA = 3.5:1); m.p. 104.0–105.5 °C; 93:7 *er* (HPLC analysis on a Daicel Chiralpak AD-H column: hexane/*i*-PrOH = 80:20, flow rate 1.00 mL/min,  $\lambda$  = 254 nm;  $\tau_{\text{major}}$  = 11.605 min,  $\tau_{\text{minor}}$  = 15.107 min);  $[\alpha]_{\text{D}}^{25}$  = +50.3 (c = 0.3 in CHCl<sub>3</sub>). <sup>1</sup>H NMR (400 MHz, CDCl<sub>3</sub>)  $\delta$  7.76 – 7.71 (m, 2H), 7.59 (t, 1H), 7.51 – 7.38 (m, 4H), 7.34 (t, *J* = 7.5 Hz, 1H), 7.31 – 7.19 (m, 2H), 6.98 – 6.86 (m, 2H), 6.79 (d, *J* = 7.8 Hz, 1H), 5.88 (br s, 1H), 3.63 (d, *J* = 13.9 Hz, 1H), 3.16 (s, 3H), 2.97 (d, *J* = 13.8 Hz, 1H). <sup>13</sup>C NMR (101 MHz, CDCl<sub>3</sub>)  $\delta$  199.0, 178.4, 143.2, 138.6, 137.6, 134.9, 133.6, 133.4, 131.0, 130.9, 130.6, 130.2, 130.1, 129.3, 128.4, 128.2, 126.2, 125.3, 122.4, 108.2, 76.3, 40.7, 26.2. HRMS-ESI: calcd. for C<sub>23</sub>H<sub>19</sub>NO<sub>3</sub> [M+H]<sup>+</sup> 358.1443, found 358.1441.

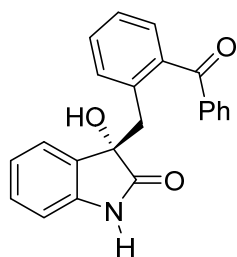

**(S)-3-(2-Benzoylbenzyl)-3-hydroxyindolin-2-one (3b)**

White solid; 33 mg, 95% yield (PE:EA = 1:1); m.p. 174.5–175.3 °C; 61:39 *er* (HPLC analysis on a Daicel Chiralpak AD-H column: hexane/*i*-PrOH = 80:20, flow rate 1.00 mL/min,  $\lambda$  = 254 nm;  $\tau_{\text{major}}$  = 11.553 min,  $\tau_{\text{minor}}$  = 13.772 min).  $[\alpha]_{\text{D}}^{25}$  = +25.3 (c = 0.3 in CHCl<sub>3</sub>). <sup>1</sup>H NMR (400 MHz, CDCl<sub>3</sub>)  $\delta$  8.02 (br s, 1H), 7.82 – 7.71 (m, 2H), 7.60 (t, *J* = 6.9 Hz, 1H), 7.53 – 7.40 (m, 4H), 7.36 (td, *J* = 7.6, 1.0 Hz, 1H), 7.23 – 7.17 (m, 2H), 6.99 – 6.88 (m, 2H), 6.86 (d, *J* = 7.8 Hz, 1H), 6.12 (br s, 1H), 3.62 (d, *J* = 13.9 Hz, 1H), 3.01 (d, *J* = 13.9 Hz, 1H). <sup>13</sup>C NMR (101 MHz, CDCl<sub>3</sub>)  $\delta$  199.2, 180.7, 140.2, 138.6, 137.7, 134.7, 133.7, 133.4, 131.0, 130.9, 130.75, 130.65, 129.3, 128.3, 126.3, 125.7, 122.3, 110.2, 76.7, 40.8. HRMS-ESI: calcd. for C<sub>22</sub>H<sub>17</sub>NO<sub>3</sub> [M+H]<sup>+</sup> 344.1287, found 344.1289.

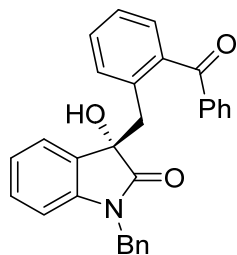

**(S)-3-(2-Benzoylbenzyl)-1-benzyl-3-hydroxyindolin-2-one (3c)**

White solid; 41 mg, 95% yield (PE:EA = 4:1); m.p. 189.5–190.5 °C; 86:14 *er* (HPLC analysis on a Daicel Chiralpak AD-H column: hexane/*i*-PrOH = 80:20, flow rate 1.00 mL/min,  $\lambda$  = 254 nm;



$\tau_{\text{major}} = 13.943$  min,  $\tau_{\text{minor}} = 16.548$  min).  $[\alpha]_{\text{D}}^{25} = +8.0$  (c = 0.3 in  $\text{CHCl}_3$ ).  $^1\text{H}$  NMR (400 MHz,  $\text{CDCl}_3$ )  $\delta$  7.71 – 7.63 (m, 2H), 7.60 – 7.54 (m, 1H), 7.45 (dd,  $J = 7.3, 1.7$  Hz, 1H), 7.41 – 7.33 (m, 4H), 7.32 – 7.23 (m, 4H), 7.16 – 7.10 (m, 2H), 7.09 – 6.99 (m, 2H), 6.88 – 6.74 (m, 1H), 6.61 (d,  $J = 7.8$  Hz, 1H), 5.43 (br s, 1H), 5.05 (d,  $J = 15.8$  Hz, 1H), 4.64 (d,  $J = 15.7$  Hz, 1H), 3.82 (d,  $J = 13.7$  Hz, 1H), 3.09 (d,  $J = 13.7$  Hz, 1H).  $^{13}\text{C}$  NMR (101 MHz,  $\text{CDCl}_3$ )  $\delta$  198.8, 178.3, 142.3, 138.7, 137.5, 133.8, 133.3, 130.9, 130.8, 130.7, 129.9, 129.3, 128.7, 128.2, 127.5, 127.2, 126.3, 125.4, 122.5, 109.2, 76.5, 43.7, 40.8. HRMS-ESI: calcd. for  $\text{C}_{29}\text{H}_{23}\text{NO}_3$   $[\text{M}+\text{H}]^+$  434.1756, found 434.1748.

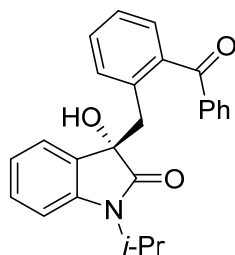

**(S)-3-(2-Benzoylbenzyl)-3-hydroxy-1-isopropylindolin-2-one (3d)**

White solid; 35 mg, 91% yield (PE:EA = 4:1); m.p. 135.7–136.5 °C; 89:11 *er* (HPLC analysis on a Daicel Chiralpak AD-H column: hexane/*i*-PrOH = 80:20, flow rate 1.00 mL/min,  $\lambda = 254$  nm;  $\tau_{\text{major}} = 10.095$  min,  $\tau_{\text{minor}} = 17.540$  min).  $[\alpha]_{\text{D}}^{25} = +17.7$  (c = 0.3 in  $\text{CHCl}_3$ ).  $^1\text{H}$  NMR (400 MHz,  $\text{CDCl}_3$ )  $\delta$  7.70 (d,  $J = 7.8$  Hz, 2H), 7.59 (t,  $J = 7.2$  Hz, 1H), 7.48–7.29 (m, 6H), 7.18 (t,  $J = 7.7$  Hz, 1H), 7.00 (d,  $J = 7.3$  Hz, 1H), 6.91 (d,  $J = 7.3$  Hz, 1H), 6.84 (t,  $J = 7.4$  Hz, 1H), 5.30 (br s, 1H), 4.50 (m, 1H), 3.70 (d,  $J = 13.7$  Hz, 1H), 2.97 (d,  $J = 13.7$  Hz, 1H), 1.42 (d,  $J = 7.0$  Hz, 3H), 1.39 (d,  $J = 7.0$  Hz, 3H).  $^{13}\text{C}$  NMR (101 MHz,  $\text{CDCl}_3$ )  $\delta$  198.8, 178.0, 141.8, 138.7, 137.6, 134.8, 133.5, 133.3, 131.0, 130.8, 130.5, 130.4, 129.2, 128.2, 126.2, 125.5, 122.0, 109.8, 76.1, 43.9, 40.9, 19.4, 19.1. HRMS-ESI: calcd. for  $\text{C}_{25}\text{H}_{23}\text{NO}_3$   $[\text{M}+\text{H}]^+$  386.1756, found 386.1749.

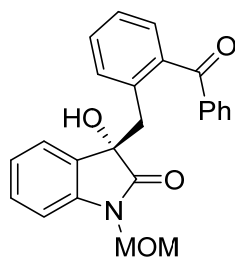

**(S)-3-(2-Benzoylbenzyl)-3-hydroxy-1-(methoxymethyl)indolin-2-one (3e)**

White solid; 29 mg, 76% yield (PE:EA = 3.5:1); m.p. 161.8–161.5 °C; 93:7 *er* (HPLC analysis on a Daicel Chiralpak AD-H column: hexane/*i*-PrOH = 80:20, flow rate 1.00 mL/min,  $\lambda = 254$  nm;  $\tau_{\text{major}} = 11.723$  min,  $\tau_{\text{minor}} = 16.780$  min).  $[\alpha]_{\text{D}}^{25} = +33.0$  (c = 0.3 in  $\text{CHCl}_3$ ).  $^1\text{H}$  NMR (400 MHz,  $\text{CDCl}_3$ )  $\delta$  7.76 – 7.71 (m, 2H), 7.65 – 7.55 (m, 1H), 7.52 – 7.40 (m, 4H), 7.38 – 7.30 (m, 1H), 7.29 – 7.19 (m, 3H), 7.05 – 6.97 (m, 2H), 6.94 (t,  $J = 7.5$  Hz, 1H), 5.90 (br s, 1H), 5.15 (d,  $J = 10.9$  Hz, 1H), 5.03 (d,  $J = 10.9$  Hz, 1H), 3.69 (d,  $J = 13.8$  Hz, 1H), 3.26 (s, 3H), 3.01 (d,  $J = 13.8$  Hz, 1H).  $^{13}\text{C}$  NMR (101 MHz,  $\text{CDCl}_3$ )  $\delta$  199.0, 178.9, 141.4, 138.7, 137.6, 134.6, 133.7, 133.4, 131.0, 130.9, 130.7, 129.8, 129.5, 128.3, 126.4, 125.5, 123.0, 109.7, 76.6, 71.6, 56.2, 41.0. HRMS-ESI: calcd. for  $\text{C}_{24}\text{H}_{21}\text{NO}_4$   $[\text{M}+\text{H}]^+$  388.1547, found 388.1549.

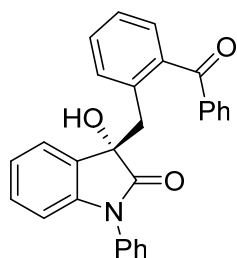

**(S)-3-(2-Benzoylbenzyl)-3-hydroxy-1-phenylindolin-2-one (3f)**

White solid; 36 mg, 87% yield (PE:EA = 4:1); m.p. 64.5–66.8 °C; 83:17 *ee* (HPLC analysis on a Daicel Chiralpak IA column: hexane/*i*-PrOH = 80:20, flow rate 1.00 mL/min,  $\lambda = 254$  nm;  $\tau_{\text{major}} = 13.205$  min,  $\tau_{\text{minor}} = 15.107$  min).  $[\alpha]_{\text{D}}^{25} = -16.3$  ( $c = 0.3$  in  $\text{CHCl}_3$ ).  $^1\text{H NMR}$  (400 MHz,  $\text{CDCl}_3$ )  $\delta$  7.73 – 7.68 (m, 2H), 7.64 – 7.54 (m, 1H), 7.53 – 7.45 (m, 3H), 7.45 – 7.38 (m, 4H), 7.37 – 7.28 (m, 4H), 7.19 – 7.12 (m, 1H), 7.08 (d,  $J = 7.3$  Hz, 1H), 6.92 (t,  $J = 7.5$  Hz, 1H), 6.76 (d,  $J = 7.9$  Hz, 1H), 5.47 (br s, 1H), 3.79 (d,  $J = 13.7$  Hz, 1H), 3.17 (d,  $J = 13.7$  Hz, 1H).  $^{13}\text{C NMR}$  (101 MHz,  $\text{CDCl}_3$ )  $\delta$  198.8, 177.5, 143.0, 138.6, 137.6, 134.7, 134.1, 133.6, 133.3, 130.97, 130.96, 130.7, 129.8, 129.5, 129.3, 128.2, 128.0, 126.4, 126.3, 125.5, 123.0, 109.4, 76.6, 41.1. HRMS-ESI: calcd. for  $\text{C}_{28}\text{H}_{21}\text{NO}_3$   $[\text{M}+\text{H}]^+$  420.1600, found 420.1598.

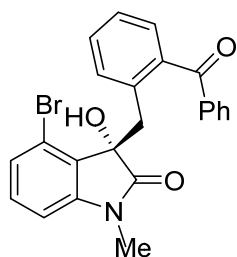

**(S)-3-(2-Benzoylbenzyl)-4-bromo-3-hydroxy-1-methylindolin-2-one (3g)**

White solid; 33 mg, 77% yield (PE:EA = 2:1); m.p. 174.2–175.4 °C; 81:19 *er* (HPLC analysis on a Daicel Chiralpak AD-H column: hexane/*i*-PrOH = 80:20, flow rate 1.00 mL/min,  $\lambda = 254$  nm;  $\tau_{\text{major}} = 23.012$  min,  $\tau_{\text{minor}} = 27.133$  min).  $[\alpha]_{\text{D}}^{25} = -22.3$  ( $c = 0.3$  in  $\text{CHCl}_3$ ).  $^1\text{H NMR}$  (400 MHz,  $\text{CDCl}_3$ )  $\delta$  7.72 (dd,  $J = 8.2, 1.1$  Hz, 2H), 7.63 – 7.53 (m, 1H), 7.47 – 7.37 (m, 3H), 7.35 – 7.22 (m, 3H), 7.09 – 6.96 (m, 2H), 6.66 (dd,  $J = 7.5, 0.9$  Hz, 1H), 4.92 (br s, 1H), 3.73 (d,  $J = 13.8$  Hz, 1H), 3.53 (d,  $J = 13.8$  Hz, 1H), 3.05 (s, 3H).  $^{13}\text{C NMR}$  (101 MHz,  $\text{CDCl}_3$ )  $\delta$  196.9, 175.3, 143.8, 137.6, 136.5, 132.8, 132.3, 132.1, 129.8, 129.7, 129.4, 127.6, 127.2, 126.1, 125.3, 118.5, 106.1, 77.4, 38.0, 25.2. HRMS-ESI: calcd. for  $\text{C}_{23}\text{H}_{18}\text{BrNO}_3$   $[\text{M}+\text{H}]^+$  436.0548, found 436.0544.

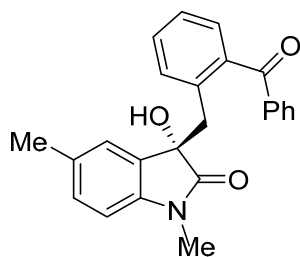

**(S)-3-(2-Benzoylbenzyl)-3-hydroxy-1,5-dimethylindolin-2-one (3h)**

White solid; 32 mg, 86% yield (PE:EA = 4:1); m.p. 196.8–198.3 °C; 95:5 *er* (HPLC analysis on a Daicel Chiralpak IA column: hexane/*i*-PrOH = 80:20, flow rate 1.00 mL/min,  $\lambda = 254$  nm;  $\tau_{\text{major}} =$

10.193 min,  $\tau_{\text{minor}} = 12.300$  min).  $[\alpha]_{\text{D}}^{25} = +31.7$  (c = 0.3 in  $\text{CHCl}_3$ ).  $^1\text{H NMR}$  (400 MHz,  $\text{CDCl}_3$ )  $\delta$  7.76 – 7.65 (m, 2H), 7.66 – 7.57 (m, 1H), 7.51 – 7.29 (m, 6H), 7.03 (d,  $J = 7.8$  Hz, 1H), 6.82 (s, 1H), 6.67 (d,  $J = 7.9$  Hz, 1H), 5.20 (br s, 1H), 3.75 (d,  $J = 13.7$  Hz, 1H), 3.14 (s, 3H), 3.05 (d,  $J = 13.7$  Hz, 1H), 2.12 (s, 3H).  $^{13}\text{C NMR}$  (101 MHz,  $\text{CDCl}_3$ )  $\delta$  198.9, 178.2, 140.8, 138.6, 137.7, 134.9, 133.6, 133.3, 132.2, 130.9, 130.8, 130.4, 130.0, 129.5, 128.2, 126.2, 126.1, 107.9, 76.6, 40.6, 26.2, 20.8. HRMS-ESI: calcd. for  $\text{C}_{24}\text{H}_{21}\text{NO}_3$   $[\text{M}+\text{H}]^+$  372.1600, found 372.1599.

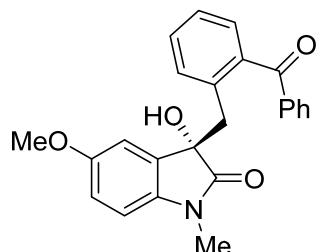

**(S)-3-(2-Benzoylbenzyl)-3-hydroxy-5-methoxy-1-methylindolin-2-one (3i)**

White solid; 33 mg, 85% yield (PE:EA = 2:1); m.p. 163.3–164.2 °C; 93:7 *er* (HPLC analysis on a Daicel Chiralpak AD-H column: hexane/*i*-PrOH = 80:20, flow rate 1.00 mL/min,  $\lambda = 254$  nm;  $\tau_{\text{major}} = 12.127$  min,  $\tau_{\text{minor}} = 15.922$  min).  $[\alpha]_{\text{D}}^{25} = +64.0$  (c = 0.2 in  $\text{CHCl}_3$ ).  $^1\text{H NMR}$  (400 MHz,  $\text{CDCl}_3$ )  $\delta$  7.69 (d,  $J = 7.8$  Hz, 2H), 7.62 – 7.55 (m, 1H), 7.50 – 7.26 (m, 6H), 6.79 – 6.70 (m, 1H), 6.67 (d,  $J = 8.4$  Hz, 1H), 6.59 – 6.47 (m, 1H), 5.63 (br s, 1H), 3.72 (d,  $J = 13.8$  Hz, 1H), 3.59 (s, 3H), 3.12 (s, 3H), 2.99 (d,  $J = 13.8$  Hz, 1H).  $^{13}\text{C NMR}$  (101 MHz,  $\text{CDCl}_3$ )  $\delta$  198.8, 178.1, 155.7, 138.7, 137.7, 136.5, 134.8, 133.6, 133.3, 131.1, 130.9, 130.8, 130.4, 128.2, 126.2, 114.5, 112.0, 108.7, 76.9, 55.6, 40.6, 26.3. HRMS-ESI: calcd. for  $\text{C}_{24}\text{H}_{21}\text{NO}_4$   $[\text{M}+\text{H}]^+$  388.1549, found 388.1543.

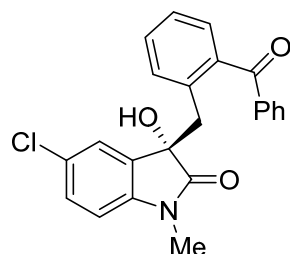

**(S)-3-(2-Benzoylbenzyl)-5-chloro-3-hydroxy-1-methylindolin-2-one (3j)**

White solid; 28 mg, 72% yield (PE:EA = 4:1); m.p. 57.8–59.7 °C; 84:16 *er* (HPLC analysis on a Daicel Chiralpak AD-H column: hexane/*i*-PrOH = 90:10, flow rate 1.00 mL/min,  $\lambda = 254$  nm;  $\tau_{\text{major}} = 9.95$  min,  $\tau_{\text{minor}} = 11.657$  min).  $[\alpha]_{\text{D}}^{25} = +36.0$  (c = 0.3 in  $\text{CHCl}_3$ ).  $^1\text{H NMR}$  (400 MHz,  $\text{CDCl}_3$ )  $\delta$  7.72 (d,  $J = 7.2$  Hz, 2H), 7.62 (t,  $J = 7.3$  Hz, 1H), 7.53 – 7.40 (m, 4H), 7.39 – 7.32 (m, 1H), 7.20 (d,  $J = 7.7$  Hz, 1H), 6.85 (s, 2H), 6.79 (s, 1H), 5.97 (br s, 1H), 3.66 (d,  $J = 13.8$  Hz, 1H), 3.14 (s, 3H), 2.93 (d,  $J = 13.8$  Hz, 1H).  $^{13}\text{C NMR}$  (101 MHz,  $\text{CDCl}_3$ )  $\delta$  199.0, 178.4, 144.5, 138.5, 137.5, 135.2, 134.6, 133.55, 133.51, 131.0, 130.7, 128.9, 128.5, 128.3, 126.4, 126.3, 122.2, 108.9, 76.1, 40.6, 26.3. HRMS-ESI: calcd. for  $\text{C}_{23}\text{H}_{18}\text{ClNO}_3$   $[\text{M}+\text{H}]^+$  392.1053, found 392.1048.

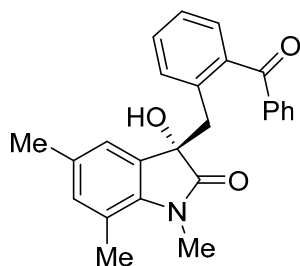

**(S)-3-(2-Benzoylbenzyl)-3-hydroxy-1,5,7-trimethylindolin-2-one (3k)**

White solid; 30 mg, 77% yield (PE:EA = 4:1); m.p. 190.0–191.2 °C; 96:4 *er* (HPLC analysis on a Daicel Chiralpak AD-H column: hexane/*i*-PrOH = 80:20, flow rate 1.00 mL/min,  $\lambda = 254$  nm;  $\tau_{\text{major}} = 9.715$  min,  $\tau_{\text{minor}} = 11.300$  min).  $[\alpha]_{\text{D}}^{25} = +20.3$  ( $c = 0.3$  in  $\text{CHCl}_3$ ).  $^1\text{H NMR}$  (400 MHz,  $\text{CDCl}_3$ )  $\delta$  7.70 – 7.64 (m, 2H), 7.62 – 7.56 (m, 1H), 7.43 (q,  $J = 7.5, 6.5$  Hz, 3H), 7.37 – 7.27 (m, 2H), 7.27 – 7.22 (m, 1H), 6.72 (s, 1H), 6.64 (s, 1H), 5.17 (br s, 1H), 3.67 (d,  $J = 13.7$  Hz, 1H), 3.37 (s, 3H), 3.03 (d,  $J = 13.7$  Hz, 1H), 2.46 (s, 3H), 2.04 (s, 3H).  $^{13}\text{C NMR}$  (101 MHz,  $\text{CDCl}_3$ )  $\delta$  198.8, 178.8, 138.6, 138.2, 137.7, 134.9, 133.7, 133.5, 133.2, 132.0, 130.9, 130.8, 130.7, 130.3, 128.1, 126.1, 123.8, 119.3, 75.9, 40.9, 29.5, 20.5, 18.8. HRMS-ESI: calcd. for  $\text{C}_{25}\text{H}_{23}\text{NO}_3$   $[\text{M}+\text{H}]^+$  386.1755, found 386.1756.

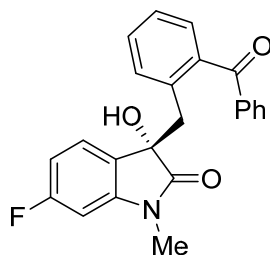

**(S)-3-(2-Benzoylbenzyl)-6-fluoro-3-hydroxy-1-methylindolin-2-one (3l)**

White solid; 26 mg, 69% yield (PE:EA = 3:1); m.p. 55.7–56.4 °C; 88:12 *er* (HPLC analysis on a Daicel Chiralpak AD-H column: hexane/*i*-PrOH = 90:10, flow rate 1.00 mL/min,  $\lambda = 254$  nm;  $\tau_{\text{major}} = 10.085$  min,  $\tau_{\text{minor}} = 12.517$  min).  $[\alpha]_{\text{D}}^{25} = +46.7$  ( $c = 0.3$  in  $\text{CHCl}_3$ ).  $^1\text{H NMR}$  (400 MHz,  $\text{CDCl}_3$ )  $\delta$  7.74 (dd,  $J = 8.2, 1.0$  Hz, 2H), 7.66 – 7.58 (m, 1H), 7.51 – 7.42 (m, 4H), 7.36 (td,  $J = 7.6, 1.1$  Hz, 1H), 7.24 – 7.19 (m, 1H), 6.89 (dd,  $J = 8.1, 5.5$  Hz, 1H), 6.70 – 6.47 (m, 2H), 5.97 (br s, 1H), 3.64 (d,  $J = 13.8$  Hz, 1H), 3.15 (s, 3H), 2.92 (d,  $J = 13.8$  Hz, 1H).  $^{13}\text{C NMR}$  (101 MHz,  $\text{CDCl}_3$ )  $\delta$  199.0, 178.6, 163.8 (d,  $J = 246.5$  Hz), 144.9 (d,  $J = 11.7$  Hz), 138.6, 137.6, 134.7, 133.5 (d,  $J = 6.3$  Hz), 131.1, 131.0, 130.6, 128.9, 128.4, 126.6 (d,  $J = 9.9$  Hz), 126.4, 125.6 (d,  $J = 2.6$  Hz), 108.3 (d,  $J = 22.1$  Hz), 97.1 (d,  $J = 27.5$  Hz), 75.9, 40.7, 26.3.  $^{19}\text{F NMR}$  (376 MHz,  $\text{CDCl}_3$ )  $\delta$  -110.3. HRMS-ESI: calcd. for  $\text{C}_{23}\text{H}_{18}\text{FNO}_3$   $[\text{M}+\text{H}]^+$  376.1349, found 376.1350.

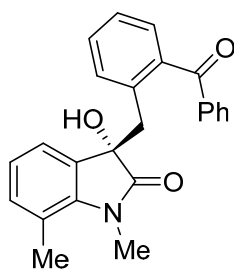

**(S)-3-(2-Benzoylbenzyl)-3-hydroxy-1,7-dimethylindolin-2-one (3m)**

White solid; 29 mg, 78% yield (PE:EA = 3:1); m.p. 137.5–138.1 °C; 93:7 *er* (HPLC analysis on a Daicel Chiralpak AD-H column: hexane/*i*-PrOH = 80:20, flow rate 1.00 mL/min,  $\lambda = 254$  nm;  $\tau_{\text{major}} = 12.103$  min,  $\tau_{\text{minor}} = 15.695$  min).  $[\alpha]_{\text{D}}^{25} = +19.3$  (c = 0.3 in CHCl<sub>3</sub>). <sup>1</sup>H NMR (400 MHz, CDCl<sub>3</sub>)  $\delta$  7.80 – 7.70 (m, 2H), 7.65 – 7.55 (m, 1H), 7.50 – 7.37 (m, 4H), 7.36 – 7.29 (m, 1H), 7.21 (d,  $J = 7.7$  Hz, 1H), 6.96 (d,  $J = 6.9$  Hz, 1H), 6.86 – 6.68 (m, 2H), 5.58 (br s, 1H), 3.58 (d,  $J = 13.8$  Hz, 1H), 3.42 (s, 3H), 2.97 (d,  $J = 13.8$  Hz, 1H), 2.53 (s, 3H). <sup>13</sup>C NMR (101 MHz, CDCl<sub>3</sub>)  $\delta$  198.9, 179.0, 140.7, 138.7, 137.7, 134.9, 133.7, 133.3, 133.1, 131.0, 130.9, 130.7, 130.4, 128.2, 126.2, 123.1, 122.3, 119.7, 75.6, 41.1, 29.6, 19.0. HRMS-ESI: calcd. for C<sub>24</sub>H<sub>21</sub>NO<sub>3</sub> [M+H]<sup>+</sup> 372.1600, found 372.1598.

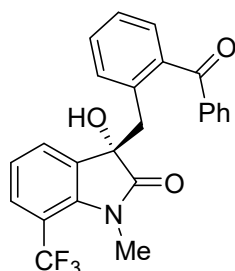

**(S)-3-(2-Benzoylbenzyl)-3-hydroxy-1-methyl-7-(trifluoromethyl)indolin-2-one (3n)**

White solid; 32 mg, 70% yield (PE:EA = 3:1); m.p. 135.3–136.8 °C; 75:25 *er* (HPLC analysis on a Daicel Chiralpak AD-H column: hexane/*i*-PrOH = 80:20, flow rate 1.00 mL/min,  $\lambda = 254$  nm;  $\tau_{\text{major}} = 6.460$  min,  $\tau_{\text{minor}} = 8.167$  min).  $[\alpha]_{\text{D}}^{25} = +12.0$  (c = 0.3 in CHCl<sub>3</sub>). <sup>1</sup>H NMR (400 MHz, CDCl<sub>3</sub>)  $\delta$  7.80 – 7.70 (m, 2H), 7.67 – 7.58 (m, 1H), 7.55 – 7.42 (m, 5H), 7.40 – 7.33 (m, 1H), 7.15 (t,  $J = 6.4$  Hz, 2H), 6.98 (t,  $J = 7.7$  Hz, 1H), 6.22 (br s, 1H), 3.60 (d,  $J = 13.9$  Hz, 1H), 3.39 – 3.36 (m, 3H), 2.97 (d,  $J = 13.9$  Hz, 1H). <sup>13</sup>C NMR (101 MHz, CDCl<sub>3</sub>)  $\delta$  199.2, 179.2, 141.1, 138.4, 137.5, 134.3, 133.71, 133.68, 133.0, 131.2, 131.1, 130.8, 128.7, 128.4, 127.2 (q,  $J = 5.9$  Hz), 123.5 (q,  $J = 271.4$  Hz), 121.7, 112.6 (q,  $J = 32.9$  Hz), 74.4, 41.2, 28.9 (q,  $J = 6.4$  Hz). <sup>19</sup>F NMR (376 MHz, CDCl<sub>3</sub>)  $\delta$  -53.0. HRMS-ESI: calcd. for C<sub>24</sub>H<sub>18</sub>F<sub>3</sub>NO<sub>3</sub> [M+H]<sup>+</sup> 426.1317, found 426.1311.

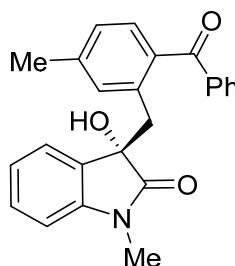

**(S)-3-(2-Benzoyl-5-methylbenzyl)-3-hydroxy-1-methylindolin-2-one (3o)**

White solid; 20 mg, 52% yield (PE:EA = 3:1); m.p. 163.0–164.5 °C; 96:4 *er* (HPLC analysis on a Daicel Chiralpak AD-H column: hexane/*i*-PrOH = 80:20, flow rate 1.00 mL/min,  $\lambda = 254$  nm;  $\tau_{\text{major}} = 10.397$  min,  $\tau_{\text{minor}} = 14.698$  min).  $[\alpha]_{\text{D}}^{25} = +73.0$  (c = 0.2 in CHCl<sub>3</sub>). <sup>1</sup>H NMR (400 MHz, CDCl<sub>3</sub>)  $\delta$  7.77 – 7.72 (m, 2H), 7.64 – 7.56 (m, 1H), 7.48 – 7.41 (m, 2H), 7.34 (d,  $J = 7.9$  Hz, 1H), 7.31 – 7.27 (m, 1H), 7.18 – 7.11 (m, 1H), 7.01 – 6.98 (m, 1H), 6.97 – 6.90 (m, 2H), 6.83 – 6.75 (m, 1H), 6.18 (br s, 1H), 3.62 (d,  $J = 13.8$  Hz, 1H), 3.19 (s, 3H), 2.89 (d,  $J = 13.8$  Hz, 1H), 2.39 (s, 3H). <sup>13</sup>C NMR (101 MHz, CDCl<sub>3</sub>)  $\delta$  199.1, 178.6, 143.2, 141.2, 138.0, 135.8, 135.1, 134.6, 133.2,

131.6, 131.0, 130.4, 129.3, 128.2, 126.9, 125.4, 122.2, 108.2, 76.3, 40.7, 26.3, 21.5. HRMS-ESI: calcd. for C<sub>24</sub>H<sub>21</sub>NO<sub>3</sub> [M+Na]<sup>+</sup> 394.1419, found 394.1417.

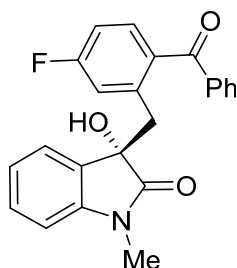

**(S)-3-(2-Benzoyl-5-fluorobenzyl)-3-hydroxy-1-methylindolin-2-one (3p)**

White solid; 29 mg, 78% yield (PE:EA = 3:1); m.p. 67.3–68.7 °C; 88:12 *er* (HPLC analysis on a Daicel Chiralpak AD-H column: hexane/*i*-PrOH = 80:20, flow rate 1.00 mL/min,  $\lambda$  = 254 nm;  $\tau_{\text{major}}$  = 10.593 min,  $\tau_{\text{minor}}$  = 13.227 min).  $[\alpha]_{\text{D}}^{25}$  = +24.3 (c = 0.3 in CHCl<sub>3</sub>). <sup>1</sup>H NMR (400 MHz, CDCl<sub>3</sub>)  $\delta$  7.72 – 7.66 (m, 2H), 7.62 – 7.55 (m, 1H), 7.48 – 7.39 (m, 3H), 7.29 – 7.25 (m, 1H), 7.08 – 6.88 (m, 4H), 6.79 (d,  $J$  = 7.8 Hz, 1H), 5.61 (br s, 1H), 3.62 (d,  $J$  = 13.8 Hz, 1H), 3.15 (s, 3H), 2.95 (d,  $J$  = 13.8 Hz, 1H). <sup>13</sup>C NMR (101 MHz, CDCl<sub>3</sub>)  $\delta$  197.9, 178.1, 163.4 (d,  $J$  = 253.5 Hz), 143.2, 138.7 (d,  $J$  = 8.5 Hz), 137.7, 134.9 (d,  $J$  = 3.0 Hz), 133.5, 133.3 (d,  $J$  = 9.0 Hz), 130.9, 130.0, 129.6, 128.3, 125.0, 122.6, 120.5 (d,  $J$  = 21.9 Hz), 113.4 (d,  $J$  = 21.5 Hz), 108.4, 76.1, 40.6, 26.3. <sup>19</sup>F NMR (376 MHz, CDCl<sub>3</sub>)  $\delta$  -101.31 – -113.03 (m). HRMS-ESI: calcd. for C<sub>23</sub>H<sub>18</sub>FNO<sub>3</sub> [M+H]<sup>+</sup> 376.1349, found 376.1348.

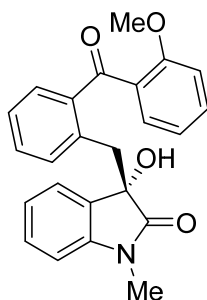

**(S)-3-Hydroxy-3-(2-(2-methoxybenzoyl)benzyl)-1-methylindolin-2-one (3q)**

White solid; 32 mg, 82% yield (PE:EA = 2:1); m.p. 65.7–66.3 °C; 94:6 *er* (HPLC analysis on a Daicel Chiralpak AD-H column: hexane/*i*-PrOH = 80:20, flow rate 1.00 mL/min,  $\lambda$  = 254 nm;  $\tau_{\text{major}}$  = 18.635 min,  $\tau_{\text{minor}}$  = 26.337 min).  $[\alpha]_{\text{D}}^{25}$  = +58.0 (c = 0.1 in CHCl<sub>3</sub>). <sup>1</sup>H NMR (400 MHz, CDCl<sub>3</sub>)  $\delta$  7.57 – 7.36 (m, 4H), 7.34 – 7.24 (m, 2H), 7.13 (d,  $J$  = 7.7 Hz, 1H), 7.07 – 6.91 (m, 4H), 6.84 (d,  $J$  = 7.8 Hz, 1H), 5.94 (br s, 1H), 3.64 (s, 3H), 3.61 (d,  $J$  = 14.0 Hz, 1H), 3.21 (s, 3H), 3.12 (d,  $J$  = 13.9 Hz, 1H). <sup>13</sup>C NMR (101 MHz, CDCl<sub>3</sub>)  $\delta$  199.5, 178.3, 158.3, 143.2, 140.7, 134.3, 133.8, 133.5, 131.3, 130.9, 130.7, 130.6, 129.3, 129.1, 126.6, 125.2, 122.3, 120.6, 111.9, 108.1, 76.4, 55.7, 40.9, 26.2. HRMS-ESI: calcd. for C<sub>24</sub>H<sub>21</sub>NO<sub>4</sub> [M+H]<sup>+</sup> 388.1549, found 388.1544.

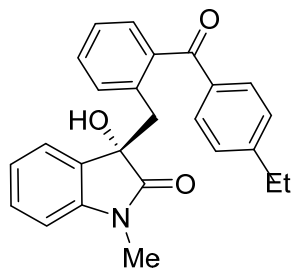

**(S)-3-(2-(4-Ethylbenzoyl)benzyl)-3-hydroxy-1-methylindolin-2-one (3r)**

White solid; 31 mg, 80% yield (PE:EA = 3:1); m.p. 103.1–104.6 °C; 90:10 *er* (HPLC analysis on a Daicel Chiralpak AD-H column: hexane/*i*-PrOH = 80:20, flow rate 1.00 mL/min,  $\lambda = 254$  nm;  $\tau_{\text{major}} = 12.845$  min,  $\tau_{\text{minor}} = 19.637$  min).  $[\alpha]_{\text{D}}^{25} = +37.7$  ( $c = 0.3$  in  $\text{CHCl}_3$ ).  $^1\text{H NMR}$  (400 MHz,  $\text{DMSO-}d_6$ )  $\delta$  7.42 (d,  $J = 8.0$  Hz, 2H), 7.39 – 7.18 (m, 5H), 7.16 – 7.05 (m, 2H), 6.80 (d,  $J = 7.8$  Hz, 1H), 6.74 – 6.65 (m, 2H), 6.08 (br s, 1H), 3.53 (d,  $J = 13.4$  Hz, 1H), 3.10 (d,  $J = 13.4$  Hz, 1H), 2.93 (s, 3H), 2.68 (q,  $J = 7.2$  Hz, 2H), 1.22 (t,  $J = 7.2$  Hz, 3H).  $^{13}\text{C NMR}$  (101 MHz,  $\text{DMSO-}d_6$ )  $\delta$  196.6, 177.2, 149.4, 142.9, 139.5, 135.1, 134.5, 132.3, 130.4, 130.3, 129.6, 129.1, 128.9, 127.8, 126.1, 124.3, 122.1, 108.3, 76.2, 39.1, 28.4, 25.9, 15.4. HRMS-ESI: calcd. for  $\text{C}_{25}\text{H}_{23}\text{NO}_3$   $[\text{M}+\text{H}]^+$  386.1756, found 386.1755.

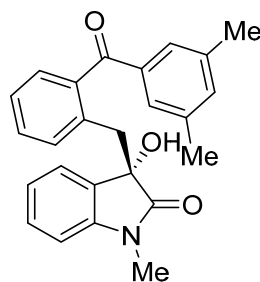

**(S)-3-(2-(3,5-Dimethylbenzoyl)benzyl)-3-hydroxy-1-methylindolin-2-one (3s)**

White solid; 34 mg, 83% yield (PE:EA = 3:1); m.p. 188.0–189.0 °C; 93:7 *er* (HPLC analysis on a Daicel Chiralpak OD column: hexane/*i*-PrOH = 97:3, flow rate 1.00 mL/min,  $\lambda = 254$  nm;  $\tau_{\text{major}} = 63.833$  min,  $\tau_{\text{minor}} = 34.058$  min),  $[\alpha]_{\text{D}}^{25} = +54.0$  ( $c = 0.3$  in  $\text{CHCl}_3$ ).  $^1\text{H NMR}$  (400 MHz,  $\text{CDCl}_3$ )  $\delta$  7.46 (td,  $J = 7.5, 1.5$  Hz, 1H), 7.39 (dd,  $J = 7.7, 1.4$  Hz, 1H), 7.35 – 7.28 (m, 3H), 7.28 – 7.17 (m, 3H), 6.96 (dd,  $J = 7.3, 1.0$  Hz, 1H), 6.90 (td,  $J = 7.5, 0.8$  Hz, 1H), 6.78 (d,  $J = 7.8$  Hz, 1H), 5.99 (br s, 1H), 3.57 (d,  $J = 13.9$  Hz, 1H), 3.16 (s, 3H), 2.94 (d,  $J = 13.9$  Hz, 1H), 2.33 (s, 6H).  $^{13}\text{C NMR}$  (101 MHz,  $\text{CDCl}_3$ )  $\delta$  199.6, 178.4, 143.2, 138.9, 137.9, 137.8, 135.2, 134.8, 133.6, 130.9, 130.5, 130.4, 129.3, 128.8, 126.2, 125.3, 122.4, 108.1, 76.2, 40.8, 26.3, 21.2. HRMS-ESI: calcd. for  $\text{C}_{25}\text{H}_{23}\text{NO}_3$   $[\text{M}+\text{H}]^+$  408.1574, found 408.1576.

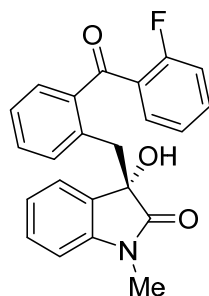

**(S)-3-(2-(2-Fluorobenzoyl)benzyl)-3-hydroxy-1-methylindolin-2-one (3t)**

White solid; 34 mg, 91% yield (PE:EA = 3.5:1); m.p. 120.1–122.5 °C; 90:10 *er* (HPLC analysis on a Daicel Chiralpak AD-H column: hexane/*i*-PrOH = 80:20, flow rate 1.00 mL/min,  $\lambda = 254$  nm;  $\tau_{\text{major}} = 11.803$  min,  $\tau_{\text{minor}} = 17.203$  min).  $[\alpha]_{\text{D}}^{25} = +36.7$  ( $c = 0.3$  in  $\text{CHCl}_3$ ).  $^1\text{H NMR}$  (400 MHz,  $\text{DMSO-}d_6$ )  $\delta$  7.69 – 7.60 (m, 1H), 7.40 – 7.32 (m, 2H), 7.32 – 7.24 (m, 3H), 7.21 (d,  $J = 7.9$  Hz, 2H), 7.18 – 7.12 (m, 1H), 6.86 (d,  $J = 7.7$  Hz, 1H), 6.80 (t,  $J = 7.4$  Hz, 1H), 6.73 (d,  $J = 7.3$  Hz, 1H), 6.11 (s, 1H), 3.68 (d,  $J = 13.2$  Hz, 1H), 3.17 (d,  $J = 13.2$  Hz, 1H), 2.98 (s, 3H).  $^{13}\text{C NMR}$  (101 MHz,  $\text{DMSO-}d_6$ )  $\delta$  194.0, 177.5, 160.9 (d,  $J = 255.0$  Hz), 143.4, 140.0, 135.1, 134.9 (d,  $J = 8.9$  Hz), 133.2, 132.3 – 132.1 (m), 130.8, 130.7, 129.8 (d,  $J = 1.4$  Hz), 129.5, 127.0 (d,  $J = 11.2$  Hz), 126.9, 124.7, 124.6 (d,  $J = 3.4$  Hz), 122.3, 117.0 (d,  $J = 21.9$  Hz), 108.7, 76.6, 39.0, 26.2.  $^{19}\text{F NMR}$  (376 MHz,  $\text{DMSO}$ )  $\delta$  -111.8. HRMS-ESI: calcd. for  $\text{C}_{23}\text{H}_{18}\text{FNO}_3$   $[\text{M}+\text{H}]^+$  376.1349, found 376.1351.

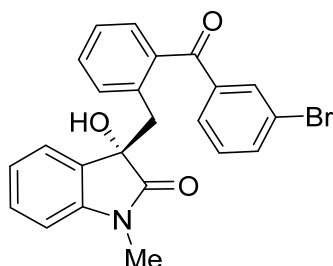

**(S)-3-(2-(3-Bromobenzoyl)benzyl)-3-hydroxy-1-methylindolin-2-one (3u)**

White solid; 38 mg, 87% yield (PE:EA = 4:1); m.p. 143.3–144.8 °C; 92:8 *er* (HPLC analysis on a Daicel Chiralpak AD-H column: hexane/*i*-PrOH = 85:15, flow rate 1.00 mL/min,  $\lambda = 254$  nm;  $\tau_{\text{major}} = 17.393$  min,  $\tau_{\text{minor}} = 29.277$  min).  $[\alpha]_{\text{D}}^{25} = +85.7$  ( $c = 0.3$  in  $\text{CHCl}_3$ ).  $^1\text{H NMR}$  (400 MHz,  $\text{DMSO-}d_6$ )  $\delta$  7.84 (d,  $J = 7.6$  Hz, 1H), 7.53 (d,  $J = 7.6$  Hz, 1H), 7.49 – 7.43 (m, 2H), 7.39 (t,  $J = 7.5$  Hz, 1H), 7.29 (t,  $J = 7.5$  Hz, 1H), 7.24 – 7.10 (m, 3H), 6.82 (d,  $J = 7.8$  Hz, 1H), 6.78 – 6.64 (m, 1H), 6.13 (s, 1H), 3.63 (d,  $J = 13.2$  Hz, 1H), 3.15 (d,  $J = 13.3$  Hz, 1H), 2.94 (s, 3H).  $^{13}\text{C NMR}$  (101 MHz,  $\text{DMSO-}d_6$ )  $\delta$  196.5, 178.1, 144.0, 140.5, 139.4, 136.6, 135.8, 133.8, 133.6, 131.6, 131.2, 130.21, 130.17, 130.0, 127.2, 125.2, 123.1, 122.6, 109.3, 77.4, 39.9, 26.9. HRMS-ESI: calcd. for  $\text{C}_{23}\text{H}_{18}\text{BrNO}_3$   $[\text{M}+\text{H}]^+$  436.0548, found 436.0543.

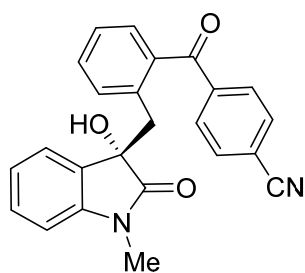

**(S)-4-(2-((3-Hydroxy-1-methyl-2-oxindolin-3-yl)methyl)benzoyl)benzonitrile (3v)**

White solid; 37 mg, 93% yield (PE:EA = 3:1); m.p. 166.4–167.2 °C; 91:9 *er* (HPLC analysis on a Daicel Chiralpak AS column: hexane/*i*-PrOH = 80:20, flow rate 1.00 mL/min,  $\lambda = 254$  nm;  $\tau_{\text{major}} = 34.058$  min,  $\tau_{\text{minor}} = 60.155$  min).  $[\alpha]_{\text{D}}^{25} = +43.7$  ( $c = 0.3$  in  $\text{CHCl}_3$ ).  $^1\text{H NMR}$  (400 MHz,  $\text{DMSO-}d_6$ )  $\delta$  7.96 (d,  $J = 8.2$  Hz, 2H), 7.63 (d,  $J = 8.2$  Hz, 2H), 7.40 (t,  $J = 7.5$  Hz, 1H), 7.34 – 7.27 (m, 1H), 7.21 – 7.11 (m, 3H), 6.83 (d,  $J = 7.8$  Hz, 1H), 6.74 – 6.66 (m, 2H), 6.08 (s, 1H), 3.62 (d,  $J = 13.2$  Hz, 1H), 3.11 (d,  $J = 13.2$  Hz, 1H), 2.93 (s, 3H).  $^{13}\text{C NMR}$  (101 MHz,  $\text{DMSO-}d_6$ )  $\delta$  195.6, 176.9, 142.8, 140.7, 138.1, 134.7, 132.8, 132.2, 131.9, 130.5, 130.2, 130.1, 129.1, 129.0,



126.1, 124.1, 121.9, 114.6, 108.2, 76.0, 38.7, 25.7. HRMS-ESI: calcd. for C<sub>24</sub>H<sub>18</sub>N<sub>2</sub>O<sub>3</sub> [M+Na]<sup>+</sup> 405.1215, found 405.1215.

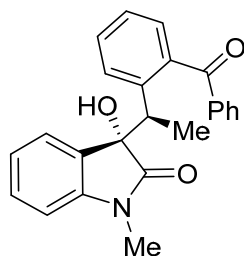

**(S)-3-((R)-1-(2-Benzoylphenyl)ethyl)-3-hydroxy-1-methylindolin-2-one (3w)**

White solid; 21 mg, 54% yield (PE:EA = 3:1); m.p. 142.6–143.4 °C; 8:1 *dr*, 82:18 *er* (**major**) (HPLC analysis on a Daicel Chiralpak IC column: hexane/*i*-PrOH = 70:30, flow rate 1.00 mL/min,  $\lambda = 254$  nm;  $\tau_{\text{major}} = 23.328$  min,  $\tau_{\text{minor}} = 18.425$  min).  $[\alpha]_{\text{D}}^{25} = +40.3$  (c = 0.3 in CHCl<sub>3</sub>). **major**: <sup>1</sup>H NMR (400 MHz, CDCl<sub>3</sub>)  $\delta$  7.88 – 7.74 (m, 1H), 7.69 – 7.10 (m, 8H), 7.04 (t, *J* = 7.6 Hz, 1H), 7.00 (d, *J* = 3.9 Hz, 1H), 6.83 (d, *J* = 7.8 Hz, 1H), 6.48 (s, 1H), 4.84 (br s, 1H), 3.68 (q, *J* = 7.1 Hz, 1H), 3.19 (s, 3H), 1.00 (d, *J* = 7.0 Hz, 3H). <sup>13</sup>C NMR (101 MHz, CDCl<sub>3</sub>)  $\delta$  199.8, 179.0, 144.6, 140.5, 138.9, 137.72, 133.71, 131.2, 130.5, 129.6, 129.5, 128.3, 127.9, 126.9, 126.1, 123.6, 122.1, 108.0, 79.2, 41.0, 26.1, 15.7. HRMS-ESI: calcd. for C<sub>24</sub>H<sub>21</sub>NO<sub>3</sub> [M+Na]<sup>+</sup> 394.1419, found 394.1417.

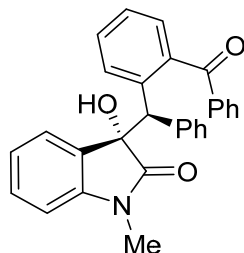

**(S)-3-((R)-1-(2-Benzoylphenyl)(phenyl)methyl)-3-hydroxy-1-methylindolin-2-one (3x)**

White solid; 25 mg, 55% yield (PE:EA = 3:1); m.p. 99.0–100.5 °C; 14:1 *dr*, 95:5 *er* (**major**) (HPLC analysis on a Daicel Chiralpak IC column: hexane/*i*-PrOH = 70:30, flow rate 1.00 mL/min,  $\lambda = 254$  nm;  $\tau_{\text{major}} = 9.255$  min,  $\tau_{\text{minor}} = 7.457$  min).  $[\alpha]_{\text{D}}^{25} = +100.0$  (c = 0.2 in CHCl<sub>3</sub>). **major**: <sup>1</sup>H NMR (400 MHz, CDCl<sub>3</sub>)  $\delta$  8.08 – 7.87 (m, 1H), 7.72 – 6.69 (m, 16H), 6.09 (d, *J* = 7.4 Hz, 1H), 5.73 – 5.31 (br s, 1H), 4.47 (s, 1H), 3.13 (s, 3H). <sup>13</sup>C NMR (101 MHz, CDCl<sub>3</sub>)  $\delta$  199.7, 178.7, 146.3, 143.9, 142.7, 139.3, 138.4, 134.5, 133.6, 133.4, 131.0, 129.5, 129.1, 128.4, 128.2, 127.9, 127.7, 127.1, 126.5, 125.9, 122.7, 108.1, 78.4, 49.3, 26.4. HRMS-ESI: calcd. for C<sub>29</sub>H<sub>23</sub>NO<sub>3</sub> [M+Na]<sup>+</sup> 456.1576, found 456.1573.

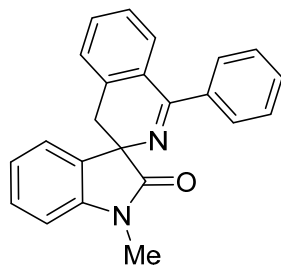

**1-Methyl-1'-phenyl-4'H-spiro[indoline-3,3'-isoquinolin]-2-one (4)**

White solid; 17 mg, 56% yield (PE:EA = 5:1); m.p. 59.4–61.3 °C; 52:48 *er* (HPLC analysis on a Daicel Chiralpak AD-H column: hexane/*i*-PrOH = 80:20, flow rate 1.00 mL/min,  $\lambda = 254$  nm;  $\tau_{\text{major}} = 5.557$  min,  $\tau_{\text{minor}} = 6.447$  min).  $[\alpha]_{\text{D}}^{25} = +16.0$  (c = 0.1 in CHCl<sub>3</sub>). <sup>1</sup>H NMR (400 MHz, CDCl<sub>3</sub>)  $\delta$  7.58 – 7.51 (m, 2H), 7.46 – 7.30 (m, 6H), 7.29 – 7.19 (m, 2H), 6.84 (d,  $J = 7.8$  Hz, 1H), 6.75 (td,  $J = 7.6, 0.8$  Hz, 1H), 6.41 (d,  $J = 7.4$  Hz, 1H), 3.63 (d,  $J = 15.7$  Hz, 1H), 3.27 (s, 3H), 2.90 (d,  $J = 15.7$  Hz, 1H). <sup>13</sup>C NMR (101 MHz, CDCl<sub>3</sub>)  $\delta$  177.9, 168.8, 143.1, 138.3, 135.2, 131.5, 130.2, 129.6, 129.3, 129.2, 129.0, 128.8, 128.3, 128.1, 127.4, 123.4, 122.6, 108.4, 66.0, 33.4, 26.6. HRMS-ESI: calcd. for C<sub>23</sub>H<sub>18</sub>N<sub>2</sub>O [M+H]<sup>+</sup> 339.1497, found 339.1494.

#### 4. ORTEP drawings of 3a, 3w and 4

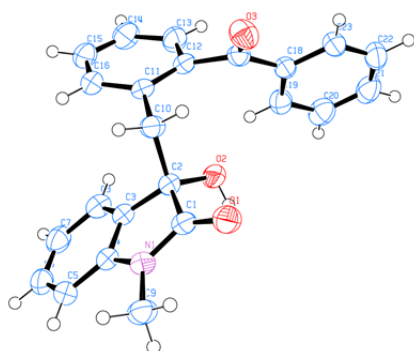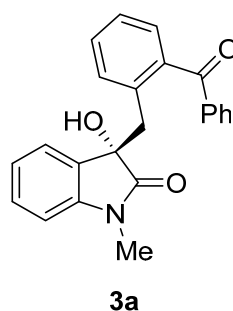

**Table 1. Crystal data and structure refinement for 3a (CCDC 1996461)**

|                                             |                                                               |
|---------------------------------------------|---------------------------------------------------------------|
| Identification code                         | <b>3a</b>                                                     |
| Empirical formula                           | C <sub>23</sub> H <sub>19</sub> NO <sub>3</sub>               |
| Formula weight                              | 357.39                                                        |
| Temperature/K                               | 295.15                                                        |
| Crystal system                              | orthorhombic                                                  |
| Space group                                 | P2 <sub>1</sub> 2 <sub>1</sub> 2 <sub>1</sub>                 |
| a/Å                                         | 6.04785(4)                                                    |
| b/Å                                         | 13.36306(6)                                                   |
| c/Å                                         | 21.94319(11)                                                  |
| α/°                                         | 90                                                            |
| β/°                                         | 90                                                            |
| γ/°                                         | 90                                                            |
| Volume/Å <sup>3</sup>                       | 1773.400(17)                                                  |
| Z                                           | 4                                                             |
| ρ <sub>calc</sub> /cm <sup>3</sup>          | 1.339                                                         |
| μ/mm <sup>-1</sup>                          | 0.714                                                         |
| F(000)                                      | 752.0                                                         |
| Crystal size/mm <sup>3</sup>                | 0.36 × 0.18 × 0.14                                            |
| Radiation                                   | CuKα (λ = 1.54184)                                            |
| 2θ range for data collection/°              | 7.746 to 158.372                                              |
| Index ranges                                | -7 ≤ h ≤ 5, -16 ≤ k ≤ 16, -27 ≤ l ≤ 27                        |
| Reflections collected                       | 21423                                                         |
| Independent reflections                     | 3749 [R <sub>int</sub> = 0.0242, R <sub>sigma</sub> = 0.0174] |
| Data/restraints/parameters                  | 3749/0/247                                                    |
| Goodness-of-fit on F <sup>2</sup>           | 1.065                                                         |
| Final R indexes [I ≥ 2σ (I)]                | R <sub>1</sub> = 0.0265, wR <sub>2</sub> = 0.0716             |
| Final R indexes [all data]                  | R <sub>1</sub> = 0.0271, wR <sub>2</sub> = 0.0720             |
| Largest diff. peak/hole / e Å <sup>-3</sup> | 0.15/-0.12                                                    |
| Flack parameter                             | -0.01(4)                                                      |

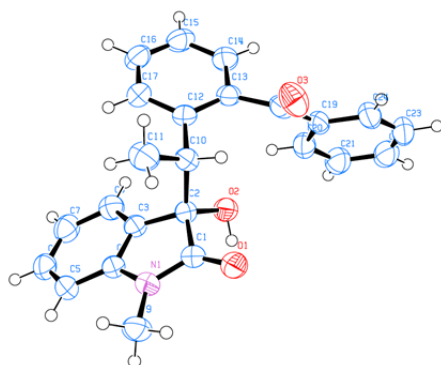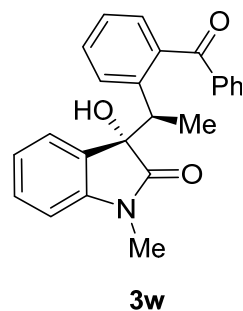

**Table 2. Crystal data and structure refinement for 3w (CCDC 1996462)**

|                                             |                                                              |
|---------------------------------------------|--------------------------------------------------------------|
| Identification code                         | <b>3w</b>                                                    |
| Empirical formula                           | C <sub>24</sub> H <sub>21</sub> NO <sub>3</sub>              |
| Formula weight                              | 371.42                                                       |
| Temperature/K                               | 294.15 K                                                     |
| Crystal system                              | orthorhombic                                                 |
| Space group                                 | P2 <sub>1</sub> 2 <sub>1</sub> 2 <sub>1</sub>                |
| a/Å                                         | 6.53150(10)                                                  |
| b/Å                                         | 13.40120(10)                                                 |
| c/Å                                         | 21.6517(2)                                                   |
| α/°                                         | 90                                                           |
| β/°                                         | 90                                                           |
| γ/°                                         | 90                                                           |
| Volume/Å <sup>3</sup>                       | 1895.17(4)                                                   |
| Z                                           | 4                                                            |
| ρ <sub>calc</sub> /cm <sup>3</sup>          | 1.302                                                        |
| μ/mm <sup>-1</sup>                          | 0.687                                                        |
| F(000)                                      | 784.0                                                        |
| Crystal size/mm <sup>3</sup>                | 0.36 x 0.16 x 0.14                                           |
| Radiation                                   | CuKα (λ = 1.54184)                                           |
| 2θ range for data collection/°              | 7.758 to 159.352 deg.                                        |
| Index ranges                                | -7 ≤ h ≤ 5, -16 ≤ k ≤ 17, -27 ≤ l ≤ 27                       |
| Reflections collected                       | 14063                                                        |
| Independent reflections                     | 3823[R <sub>int</sub> = 0.0356, R <sub>sigma</sub> = 0.0297] |
| Data/restraints/parameters                  | 3823/0/260                                                   |
| Goodness-of-fit on F <sup>2</sup>           | 1.066                                                        |
| Final R indexes [I ≥ 2σ (I)]                | R <sub>1</sub> = 0.0322, wR <sub>2</sub> = 0.0863            |
| Final R indexes [all data]                  | R <sub>1</sub> = 0.0335, wR <sub>2</sub> = 0.0875            |
| Largest diff. peak/hole / e Å <sup>-3</sup> | 0.14/-0.13                                                   |
| Flack parameter                             | -0.07(11)                                                    |

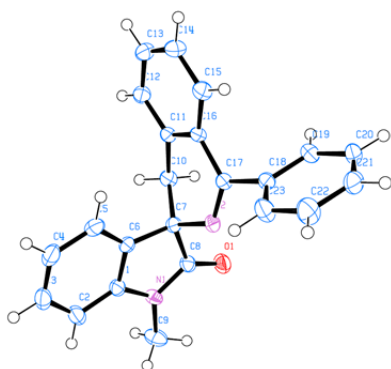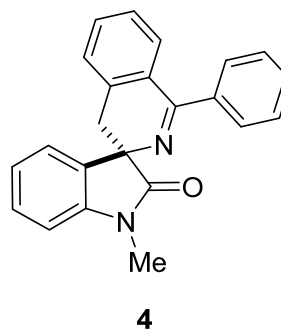

**Table 3. Crystal data and structure refinement for 4 (CCDC 1996463)**

|                                                  |                                                                                                                                  |
|--------------------------------------------------|----------------------------------------------------------------------------------------------------------------------------------|
| Identification code                              | <b>4</b>                                                                                                                         |
| Empirical formula                                | C <sub>23</sub> H <sub>18</sub> N <sub>2</sub> O                                                                                 |
| Formula weight                                   | 338.39                                                                                                                           |
| Temperature/K                                    | 113.15 K                                                                                                                         |
| Wavelength                                       | 0.71073 Å                                                                                                                        |
| Crystal system                                   | Triclinic                                                                                                                        |
| Space group                                      | P-1                                                                                                                              |
| Unit cell dimensions                             | a = 8.4653(17) Å    alpha = 82.97(3) deg.<br>b = 10.802(2) Å    beta = 67.84(3) deg.<br>c = 11.181(2) Å    gamma = 69.97(3) deg. |
| Volume/Å <sup>3</sup>                            | 889.6(4)                                                                                                                         |
| Z                                                | 2                                                                                                                                |
| $\rho_{\text{calc}}/\text{cm}^3$                 | 1.263                                                                                                                            |
| Absorption coefficient /mm <sup>-1</sup>         | 0.078                                                                                                                            |
| F(000)                                           | 356                                                                                                                              |
| Crystal size/mm <sup>3</sup>                     | 0.200 x 0.180 x 0.120                                                                                                            |
| Radiation                                        | MoK $\alpha$ ( $\lambda$ = 0.71073)                                                                                              |
| 2 $\theta$ range for data collection/ $^{\circ}$ | 3.934 to 55.54 deg.                                                                                                              |
| Index ranges                                     | -10 $\leq$ h $\leq$ 11, -14 $\leq$ k $\leq$ 14, -14 $\leq$ l $\leq$ 14                                                           |
| Reflections collected                            | 10578                                                                                                                            |
| Independent reflections                          | 4134 [R <sub>int</sub> = 0.0494, R <sub>sigma</sub> = 0.0988]                                                                    |
| Absorption correction                            | Semi-empirical from equivalents                                                                                                  |
| Data/restraints/parameters                       | 4134/0/236                                                                                                                       |
| Goodness-of-fit on F <sup>2</sup>                | 1.064                                                                                                                            |
| Final R indexes [I $\geq$ 2 $\sigma$ (I)]        | R <sub>1</sub> = 0.0390, wR <sub>2</sub> = 0.0760                                                                                |
| Final R indexes [all data]                       | R <sub>1</sub> = 0.0813, wR <sub>2</sub> = 0.0862                                                                                |
| Largest diff. peak/hole / e Å <sup>-3</sup>      | 0.28/-0.22                                                                                                                       |

## 5. NMR spectra

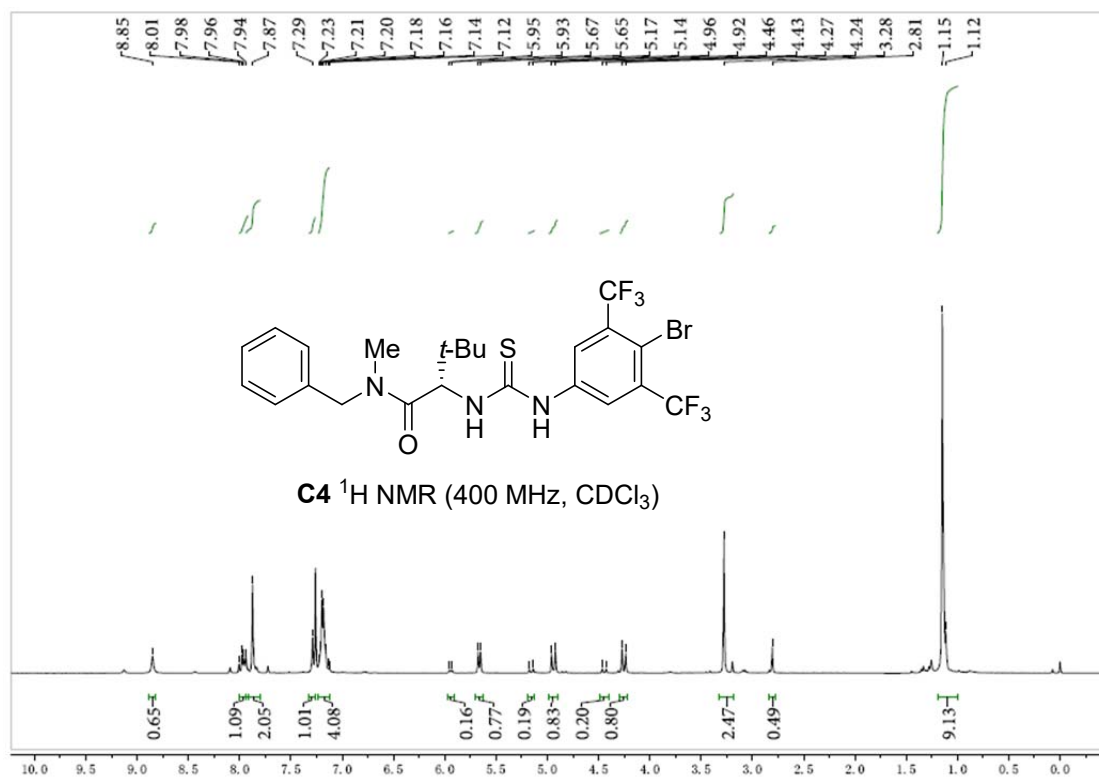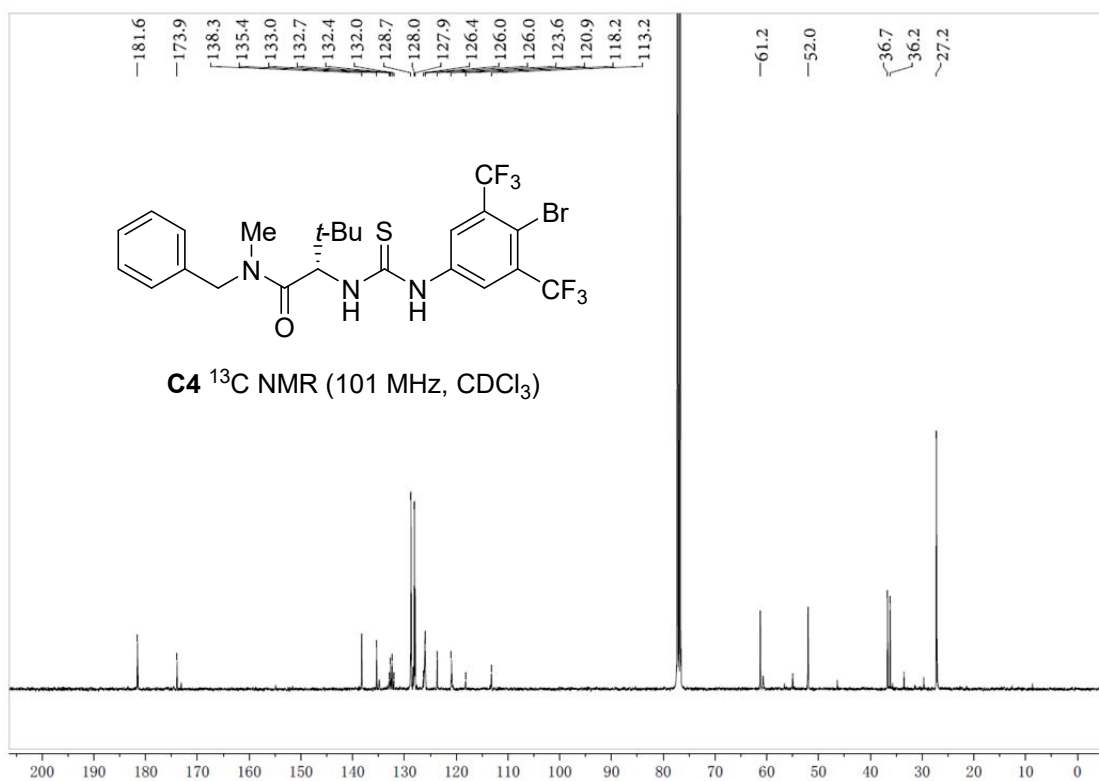

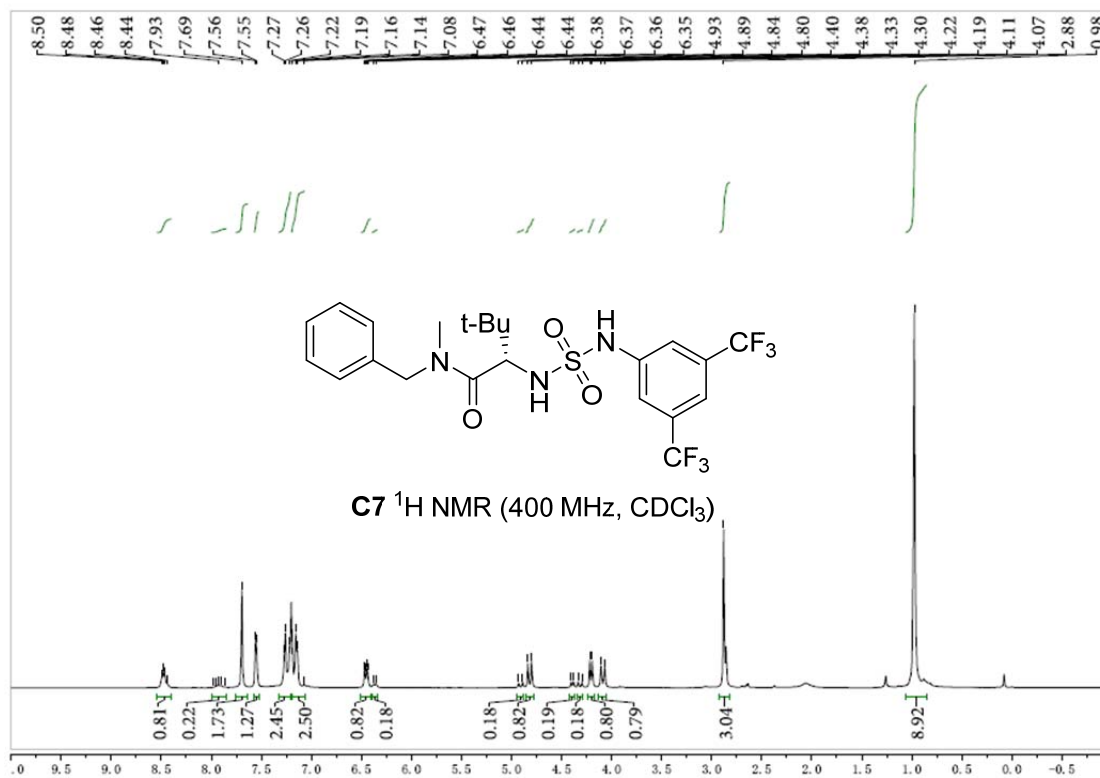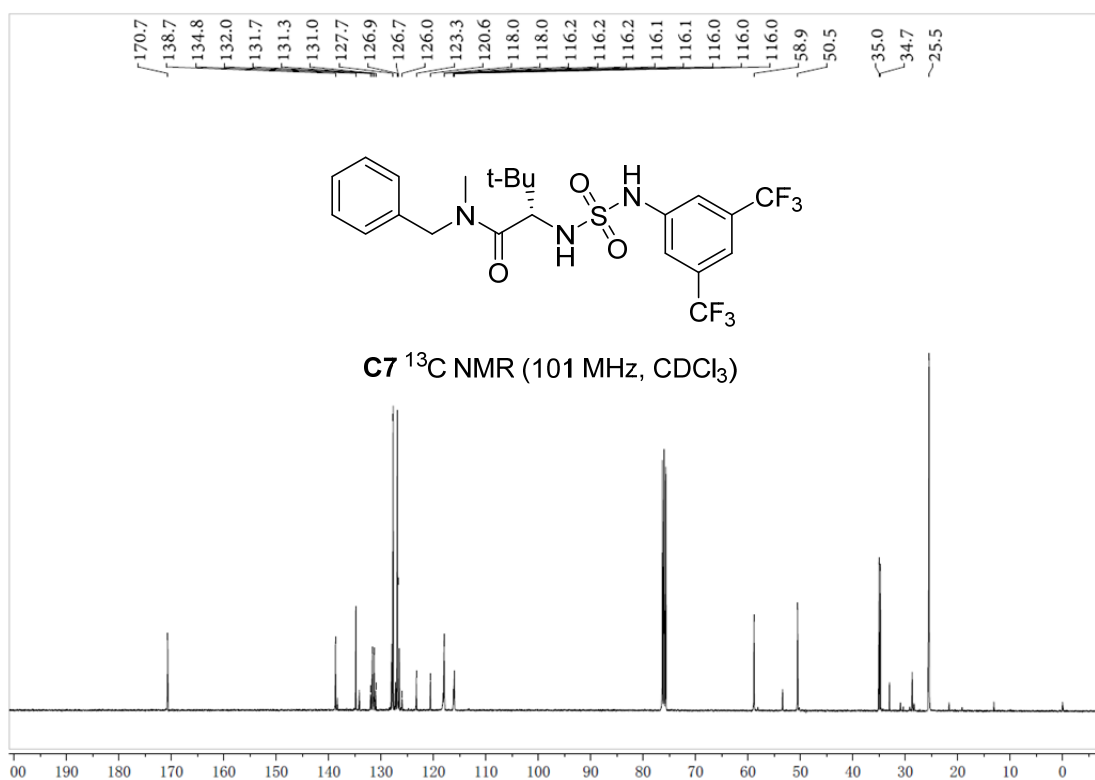

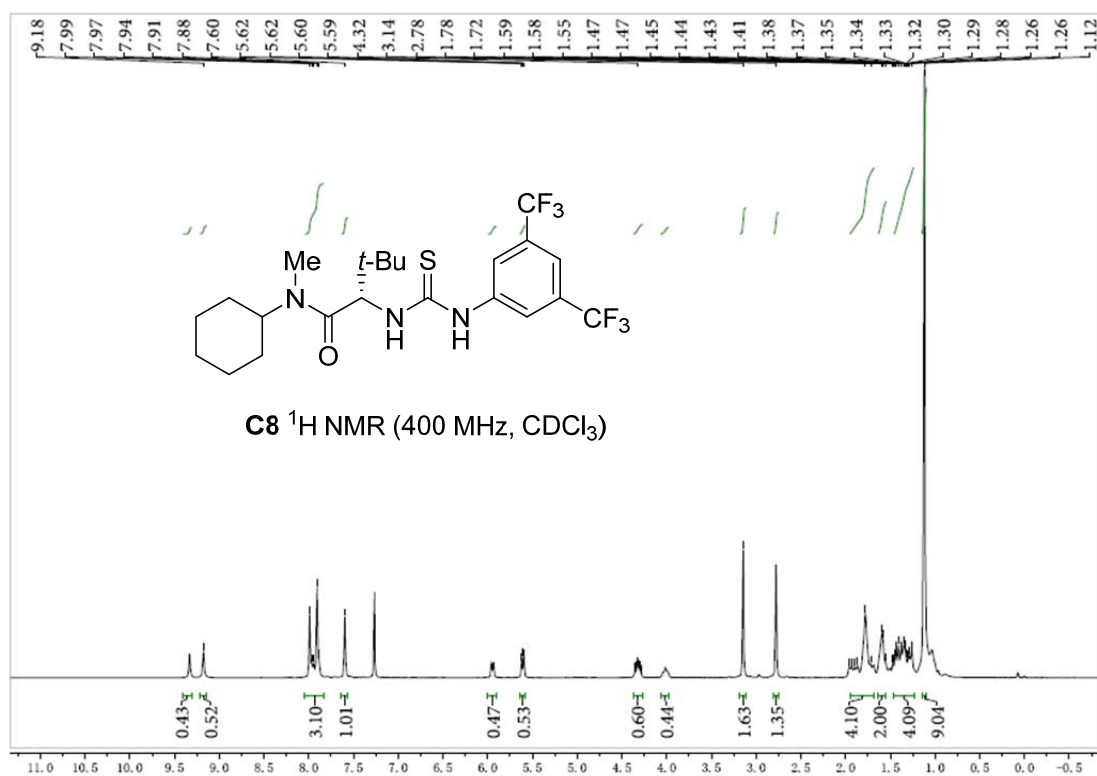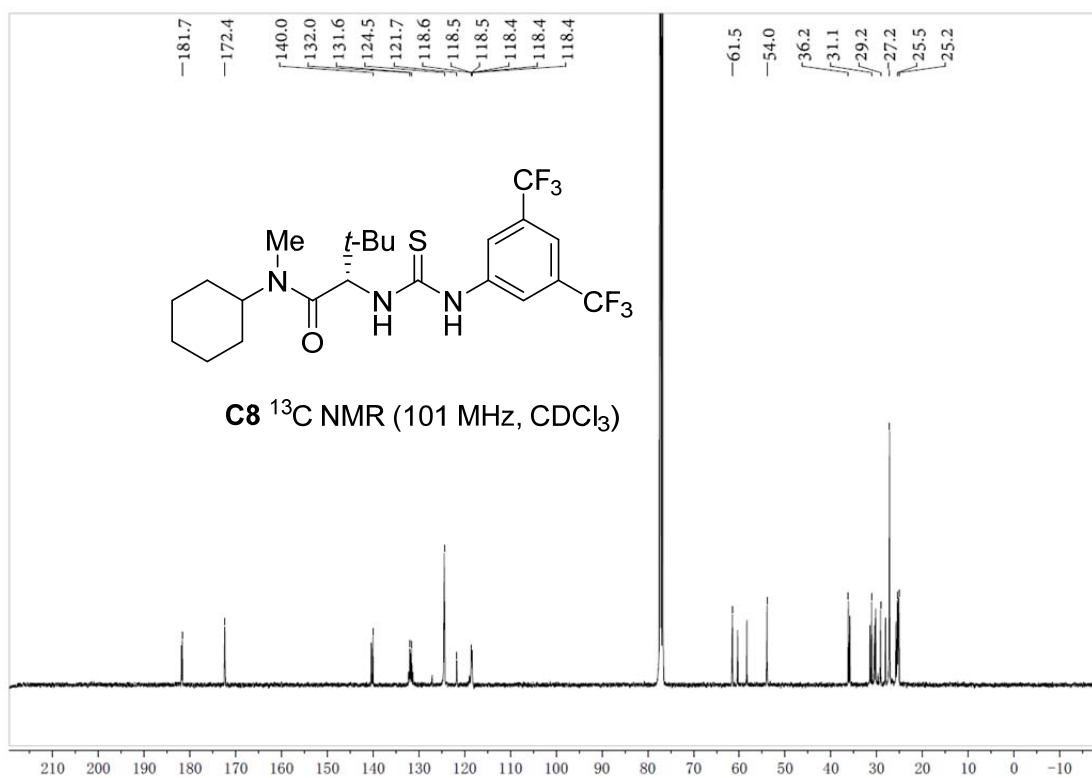



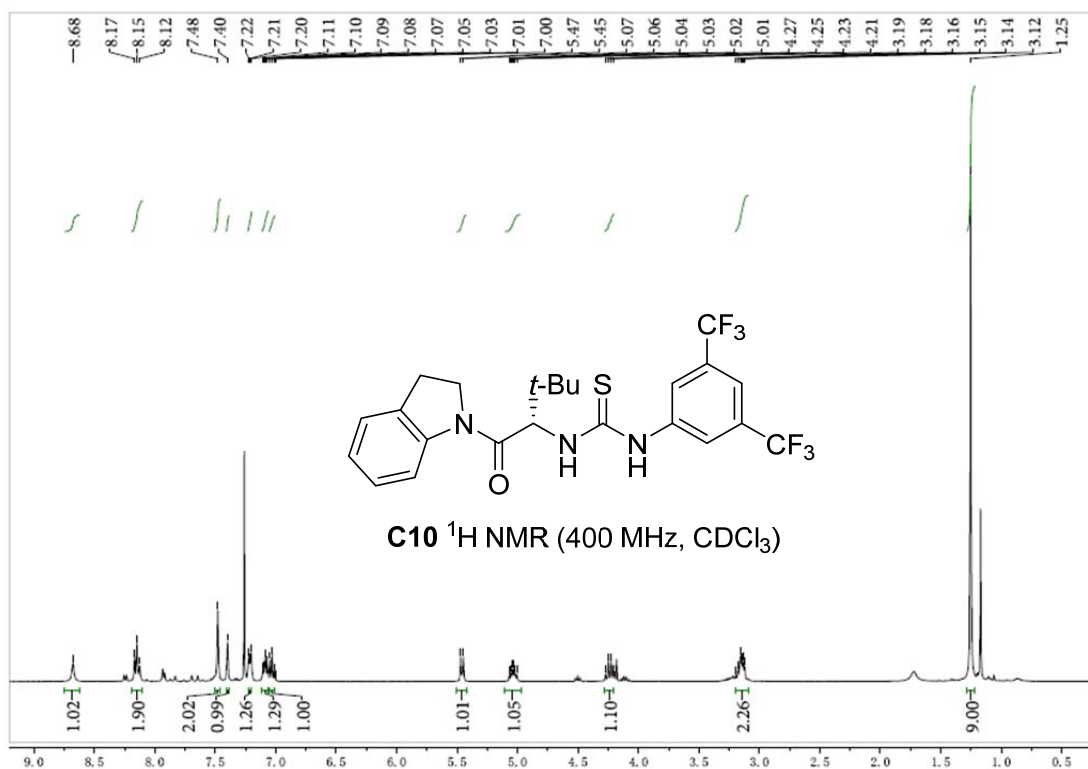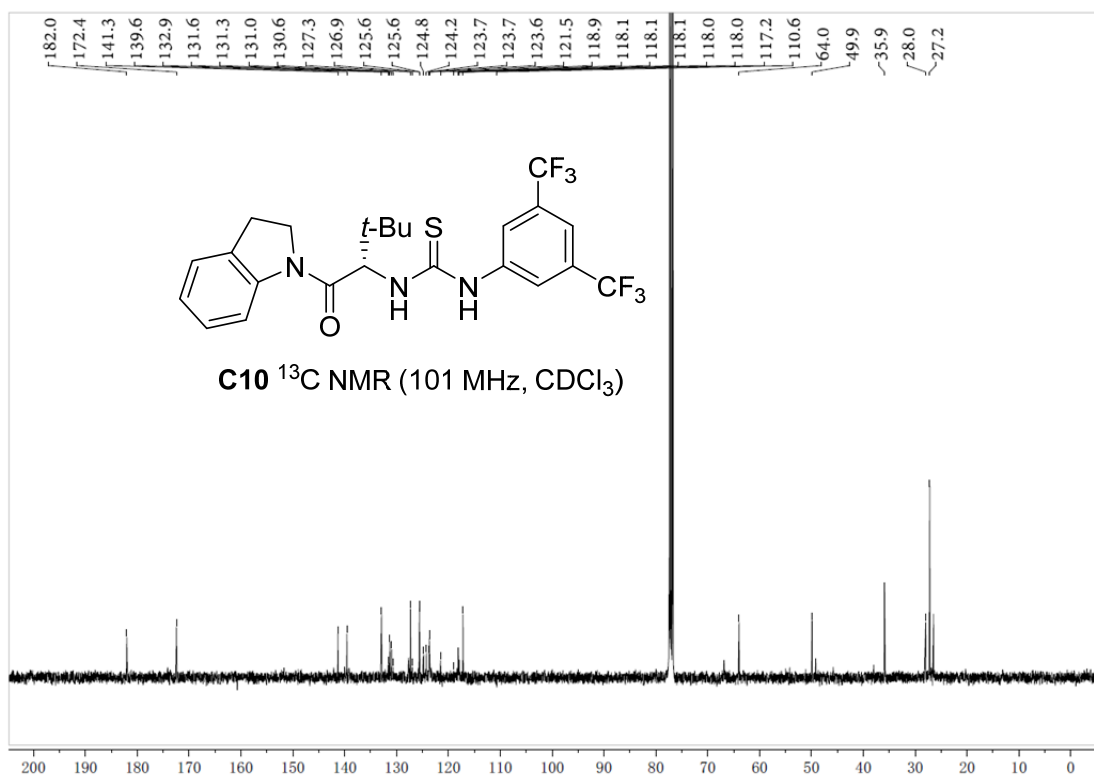

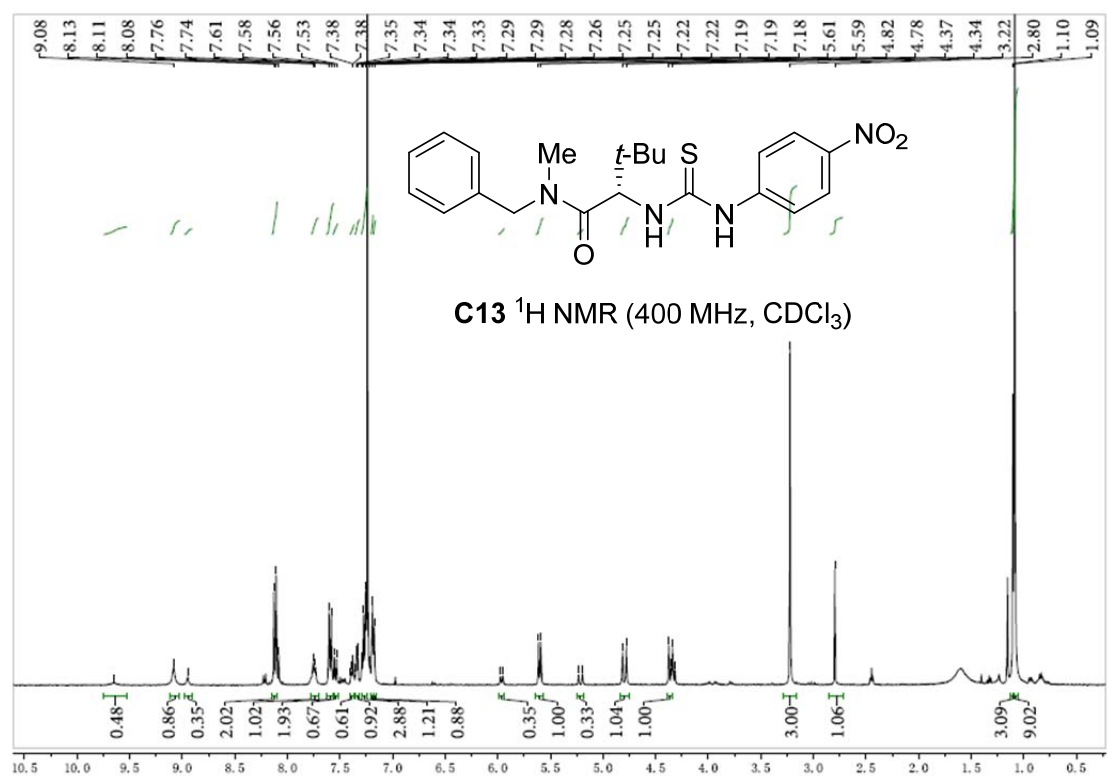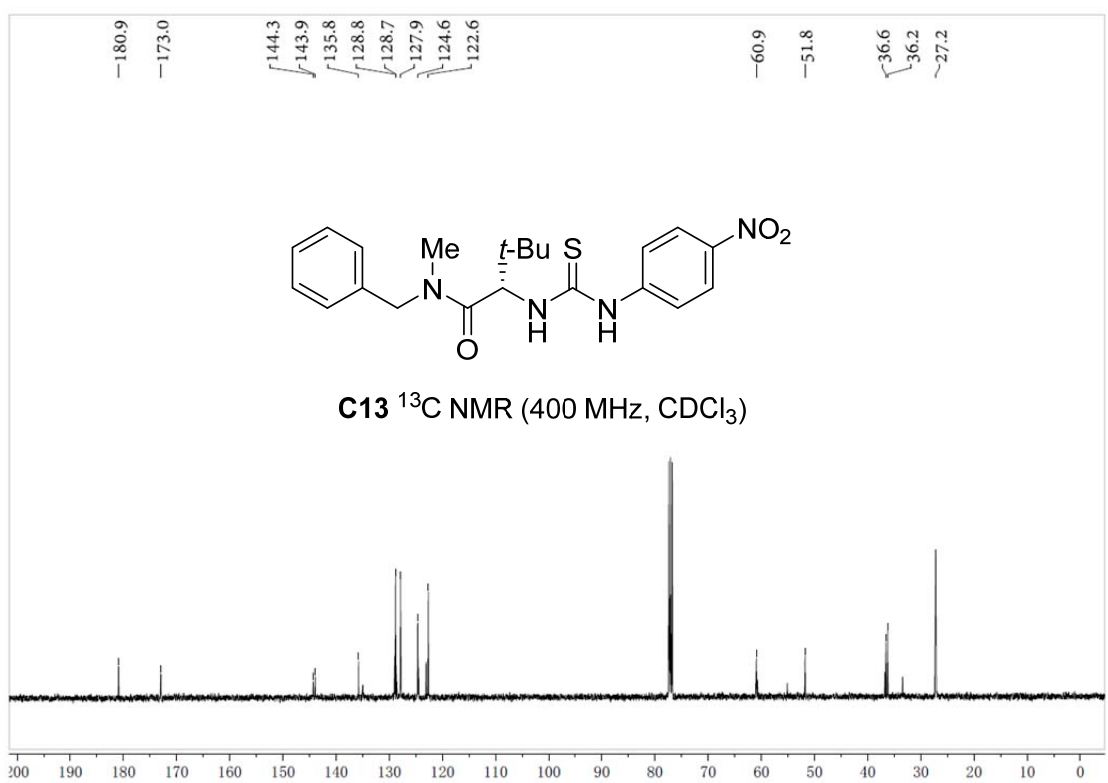

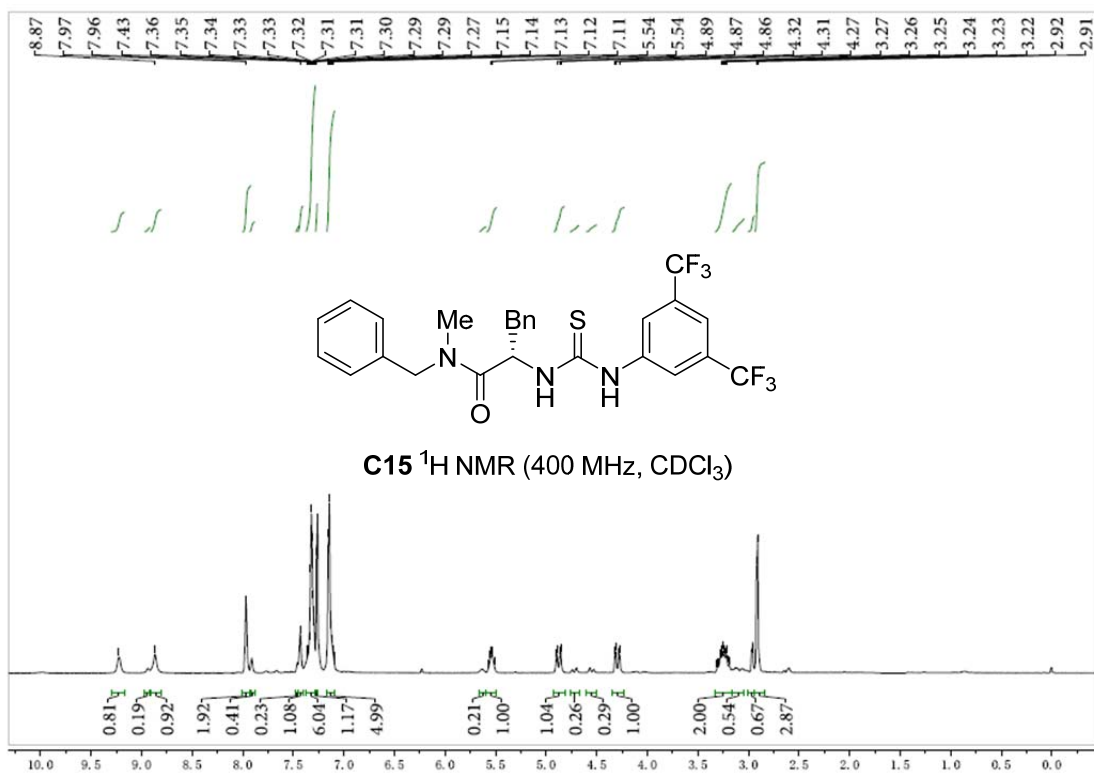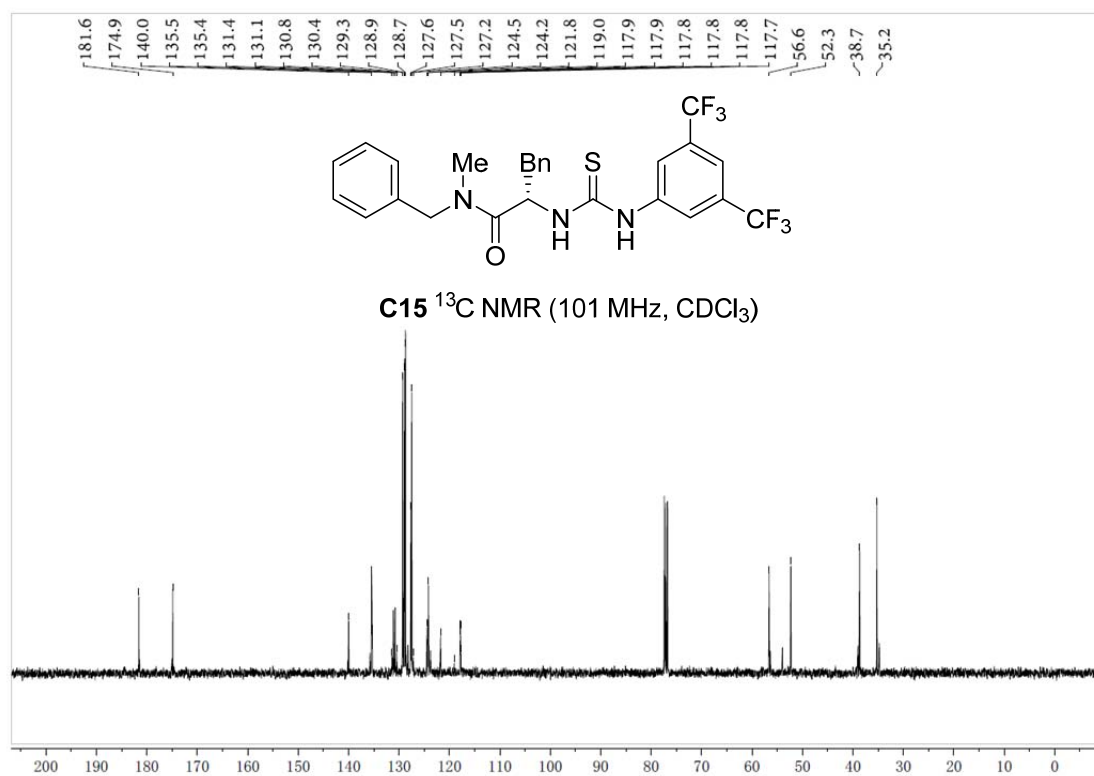

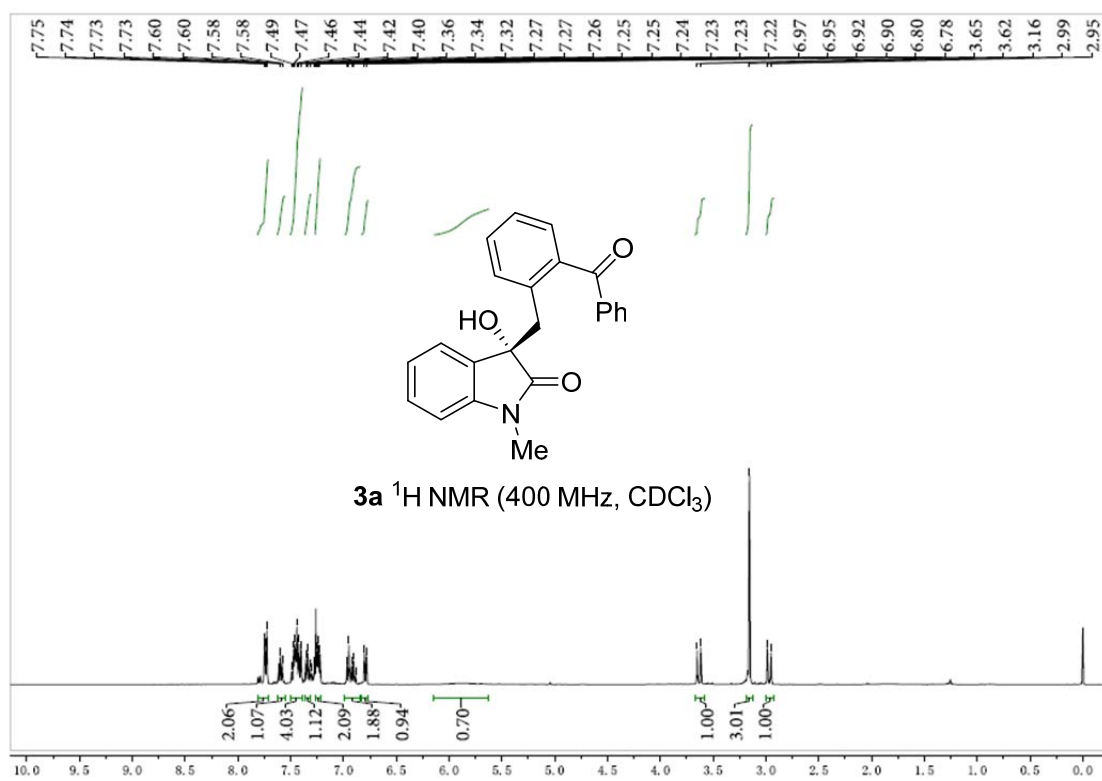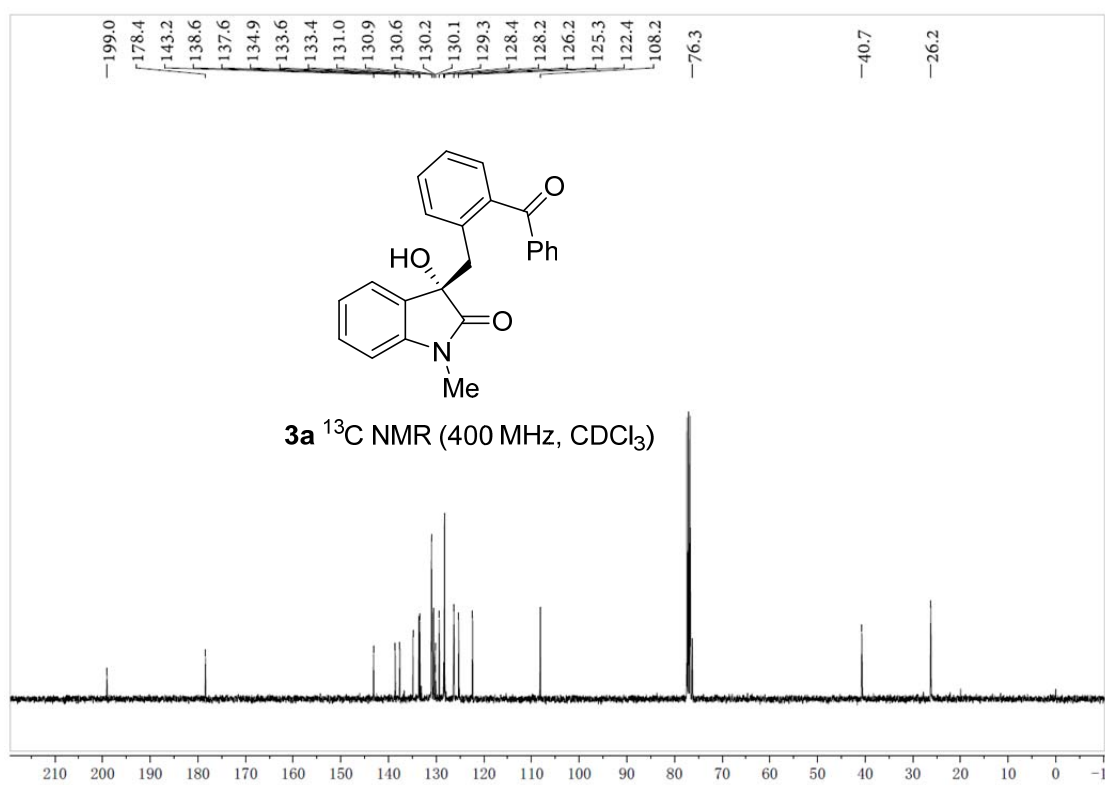

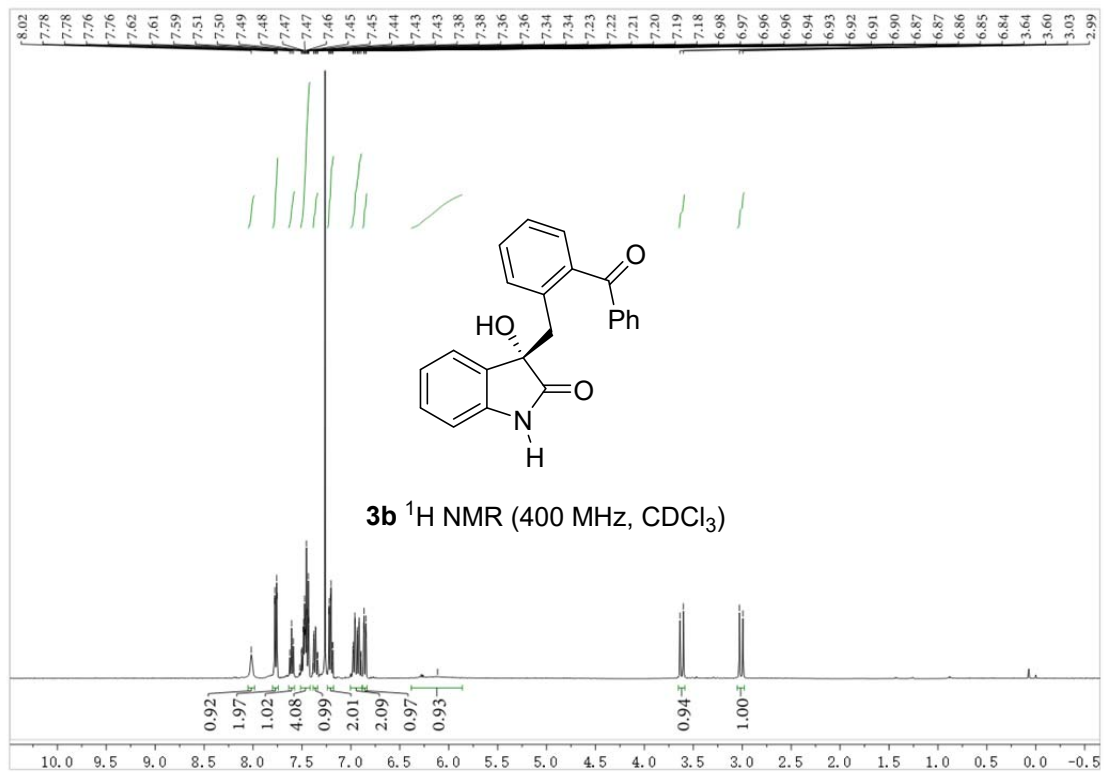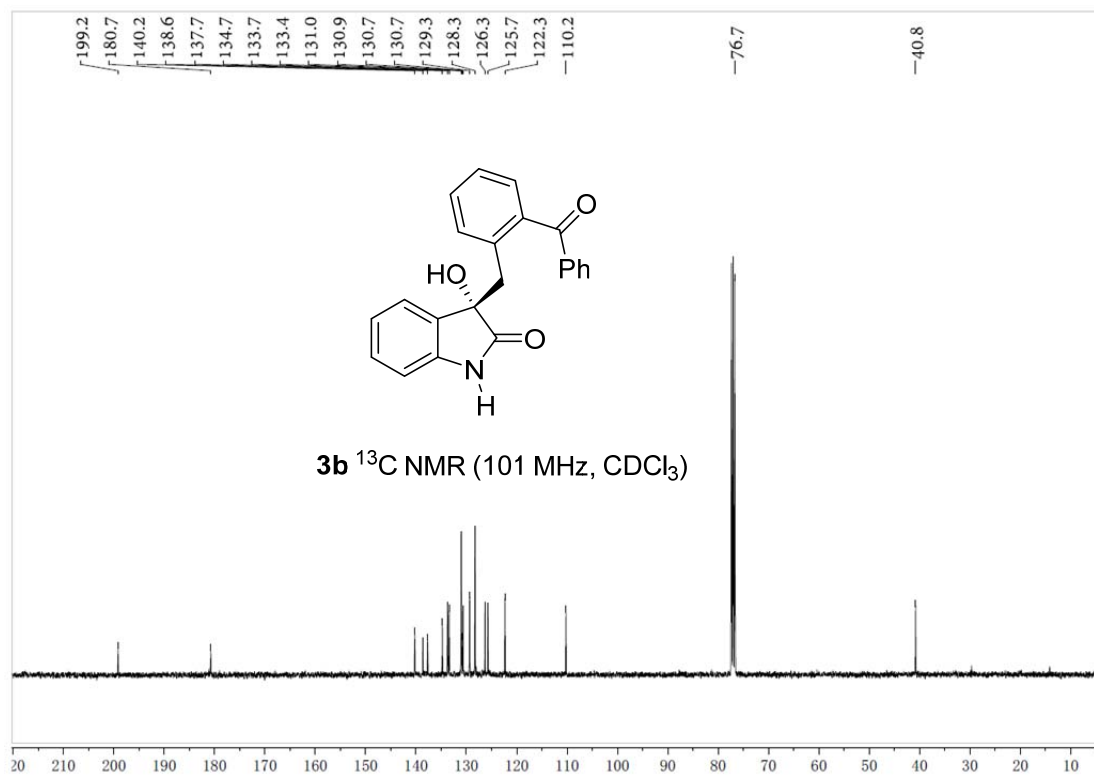

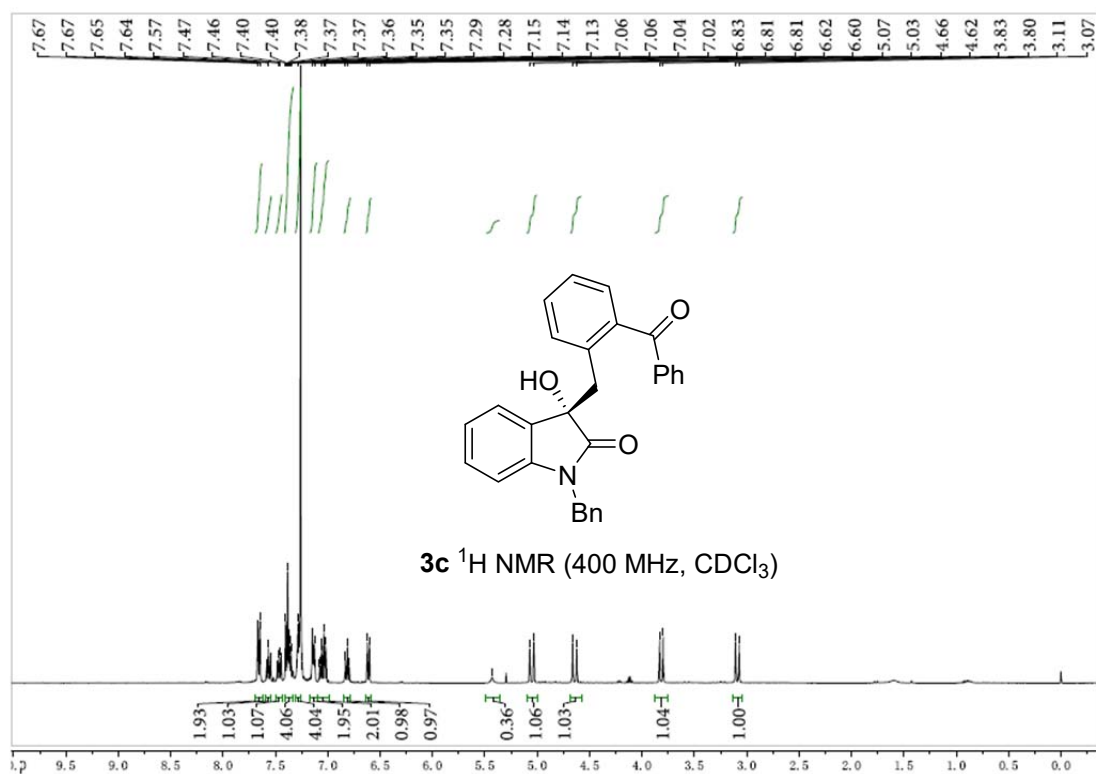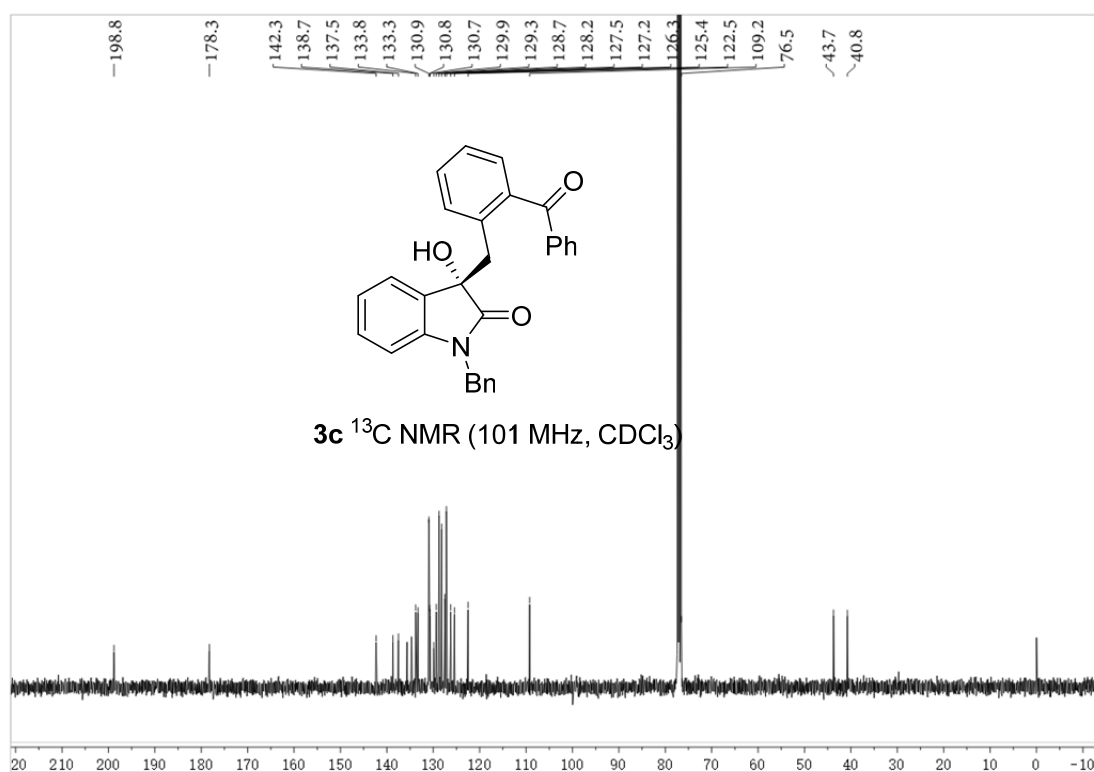

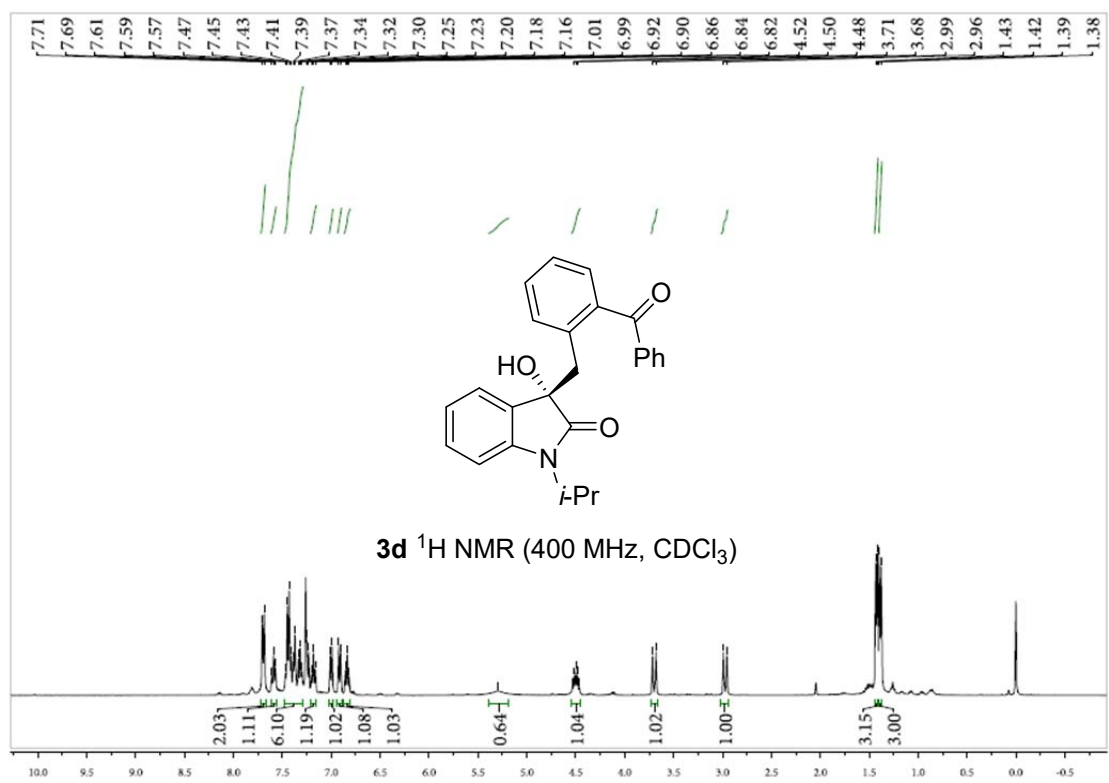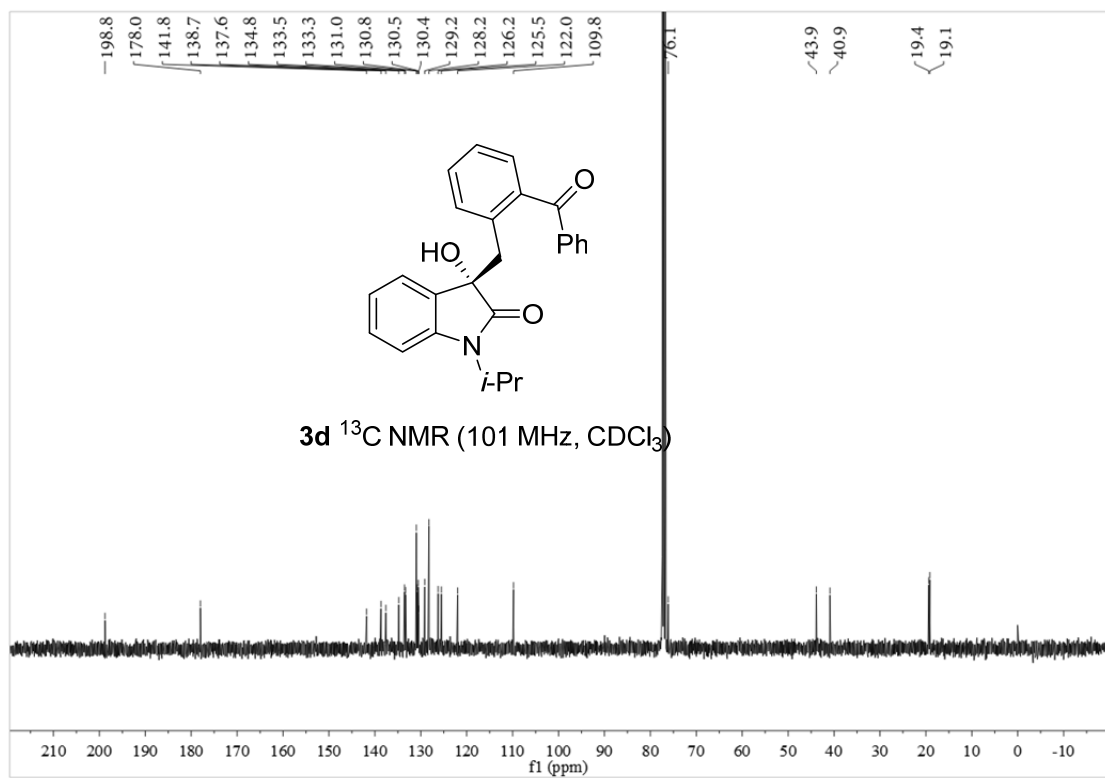

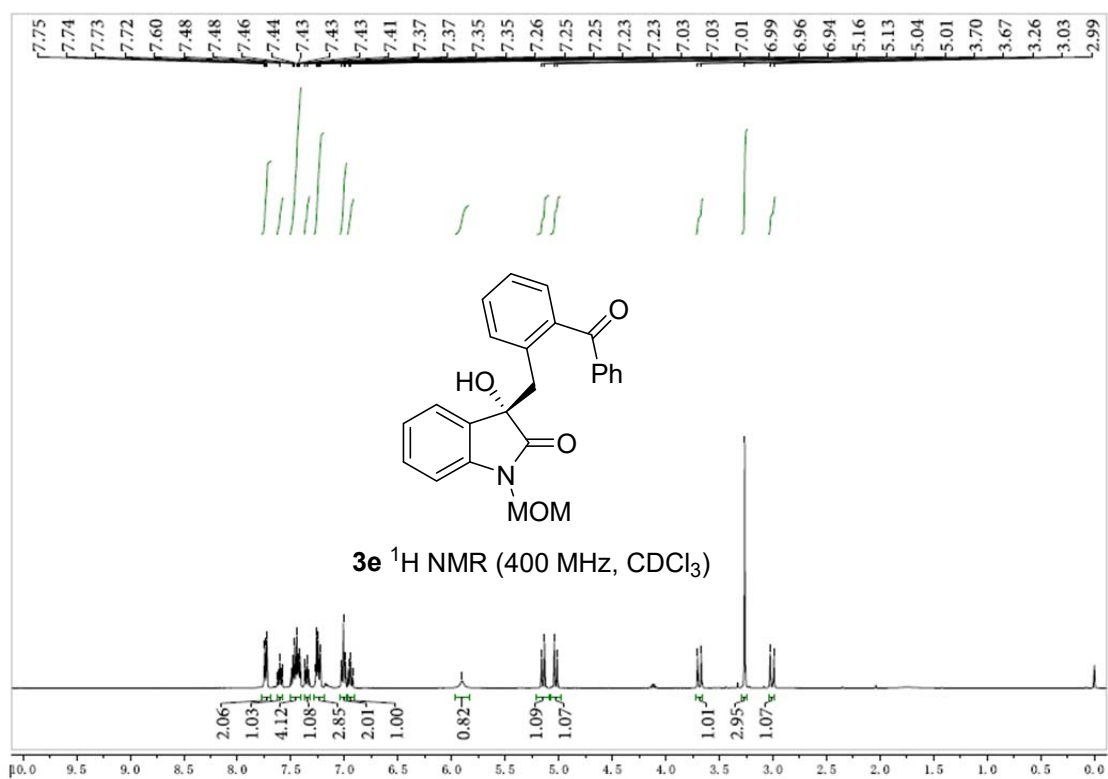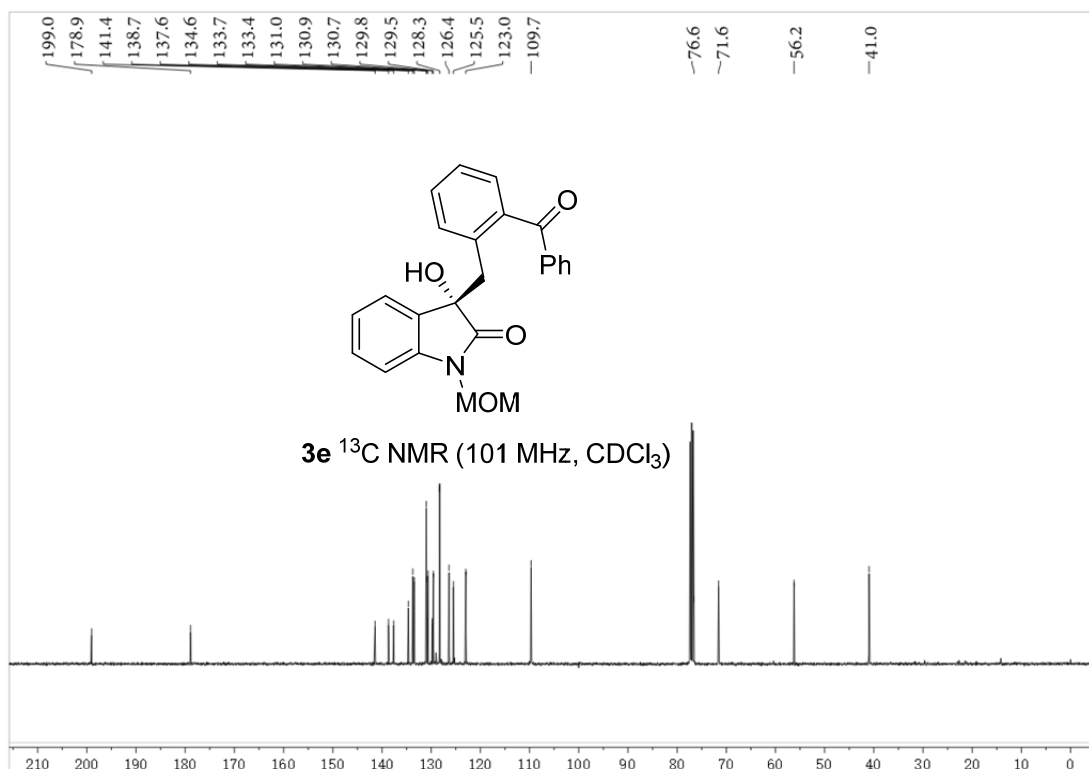



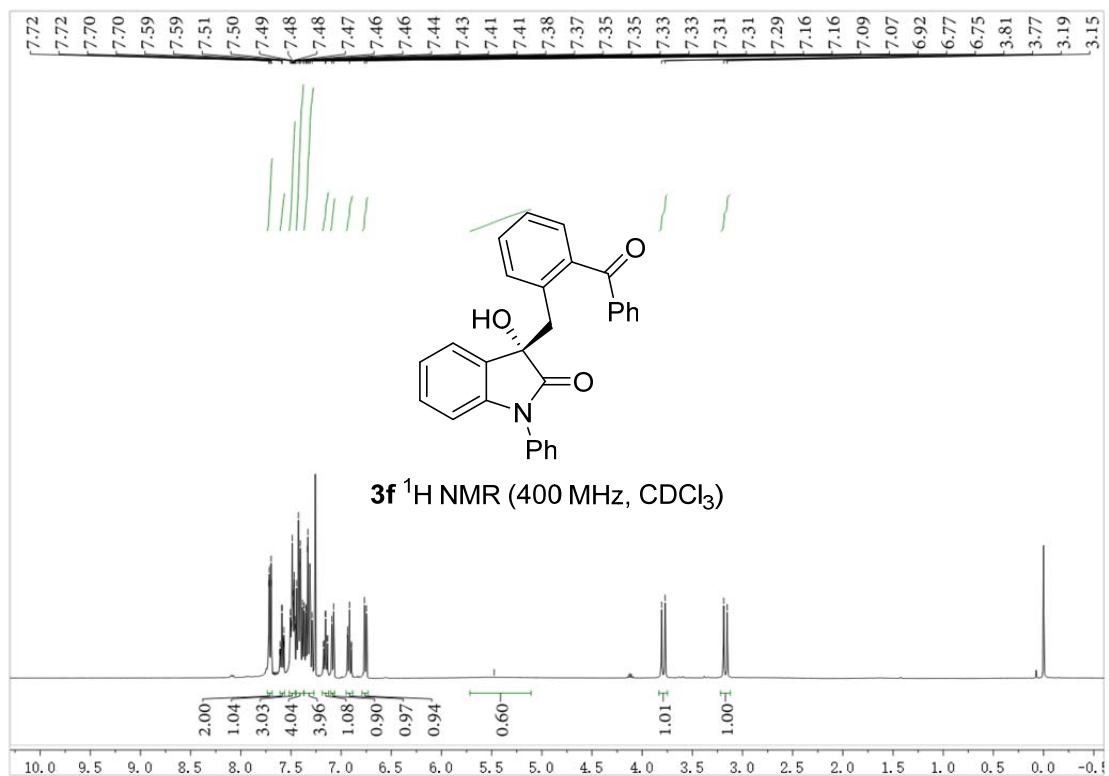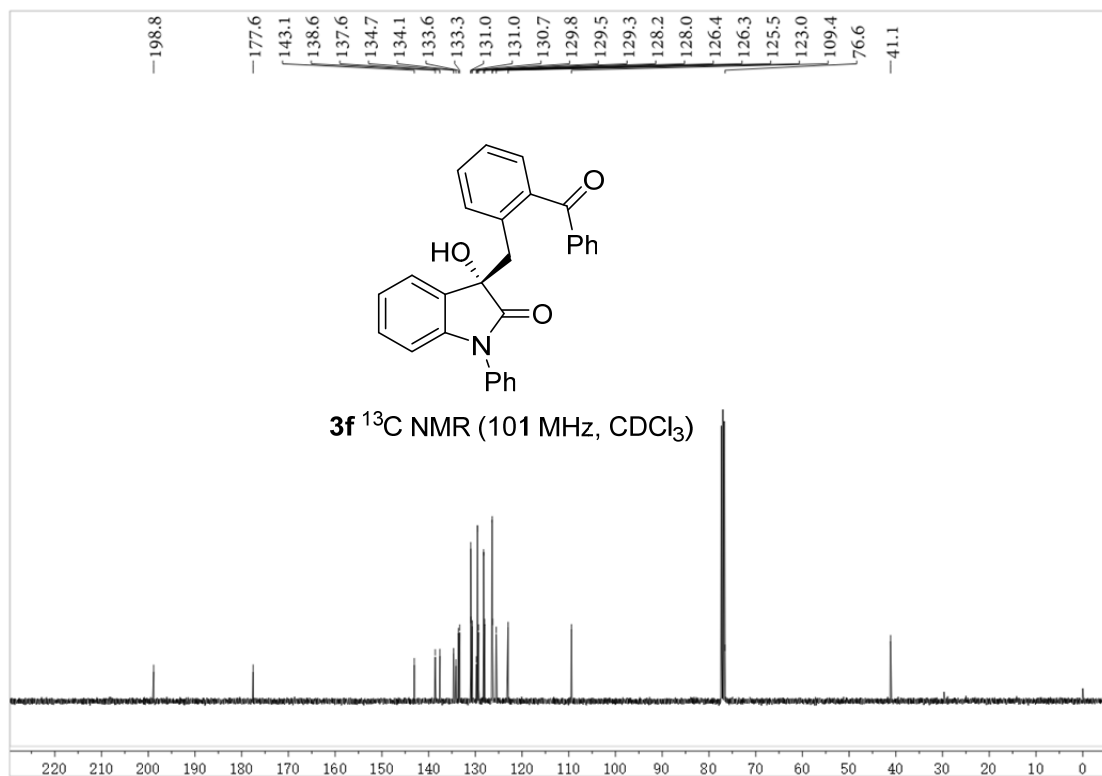

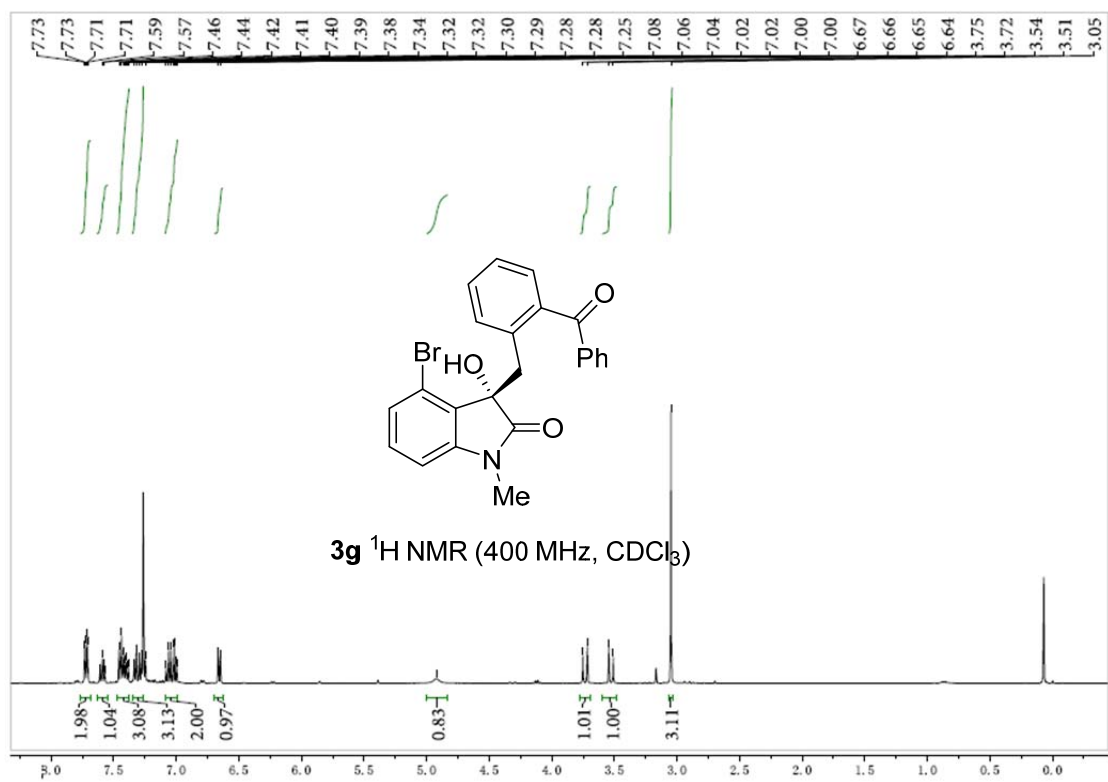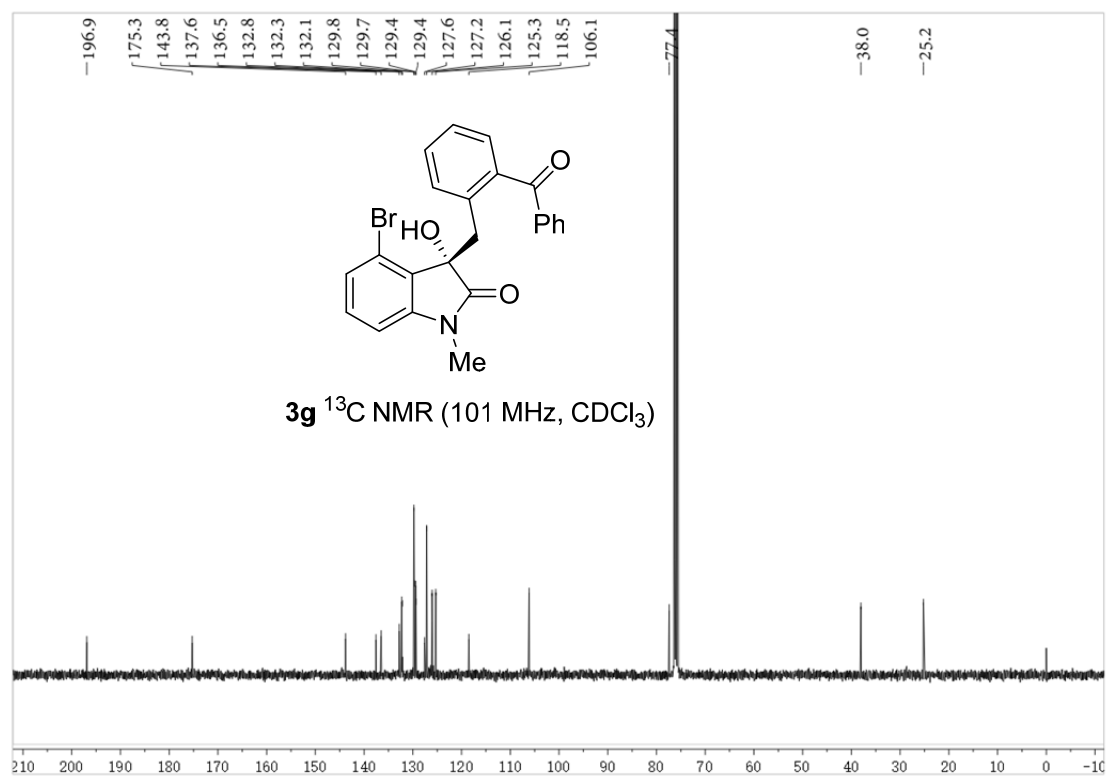

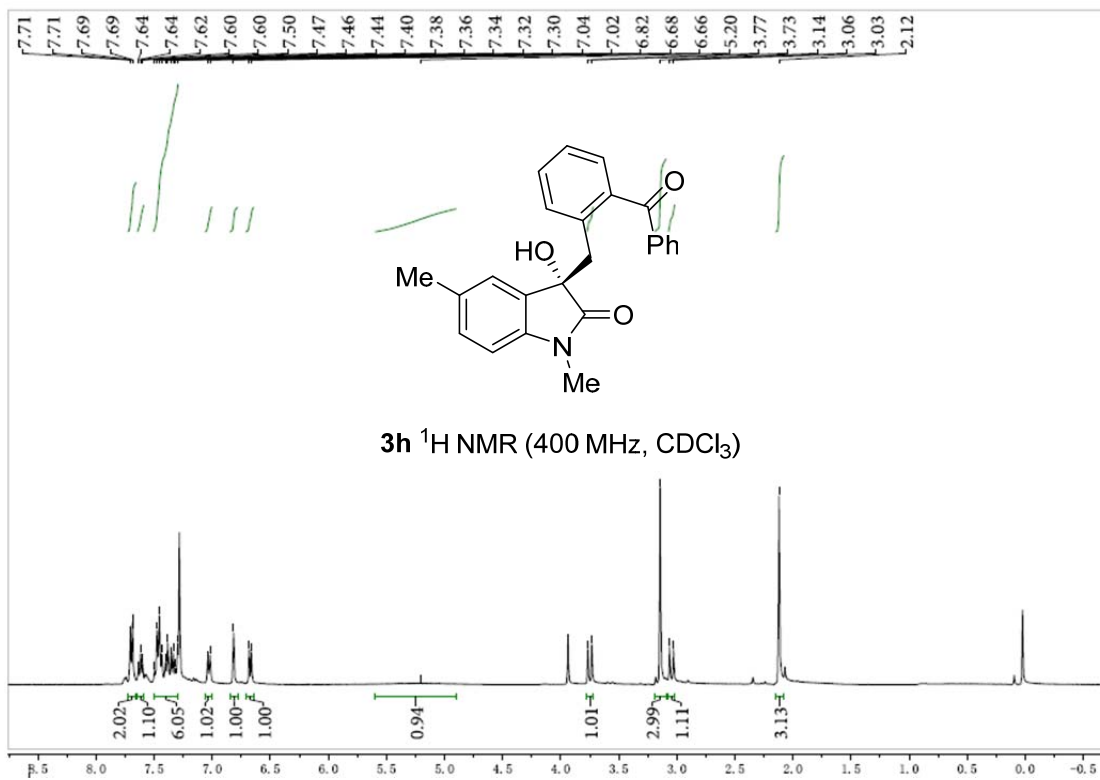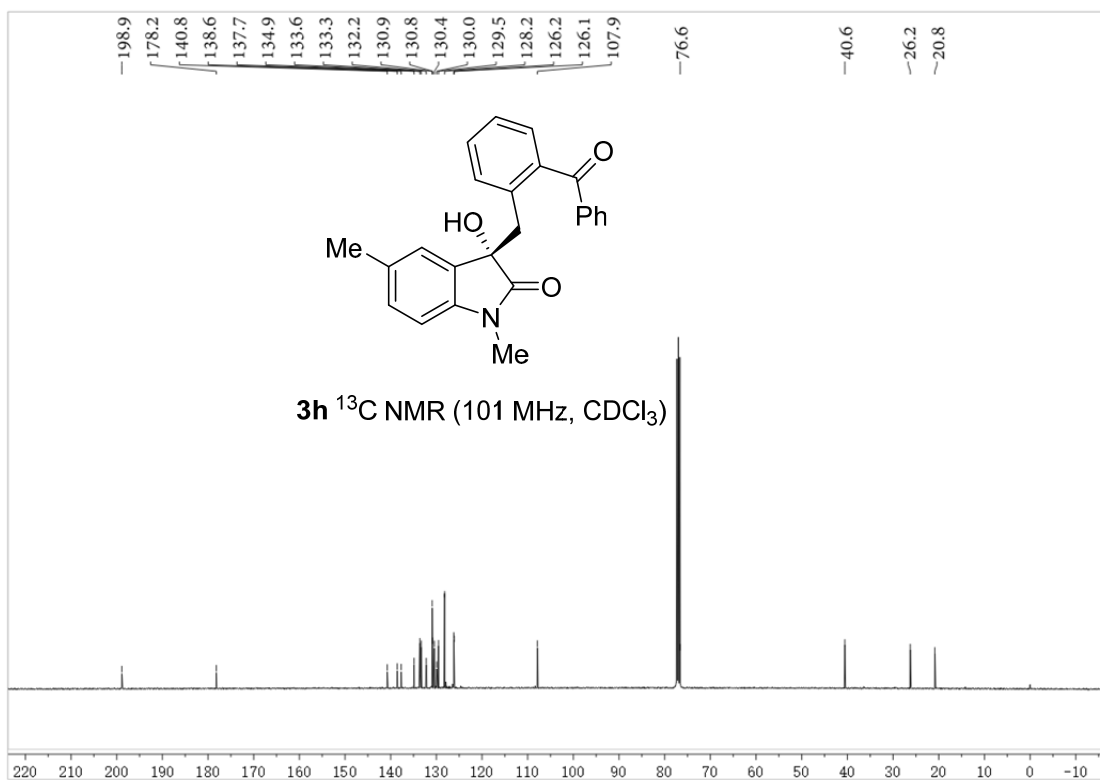

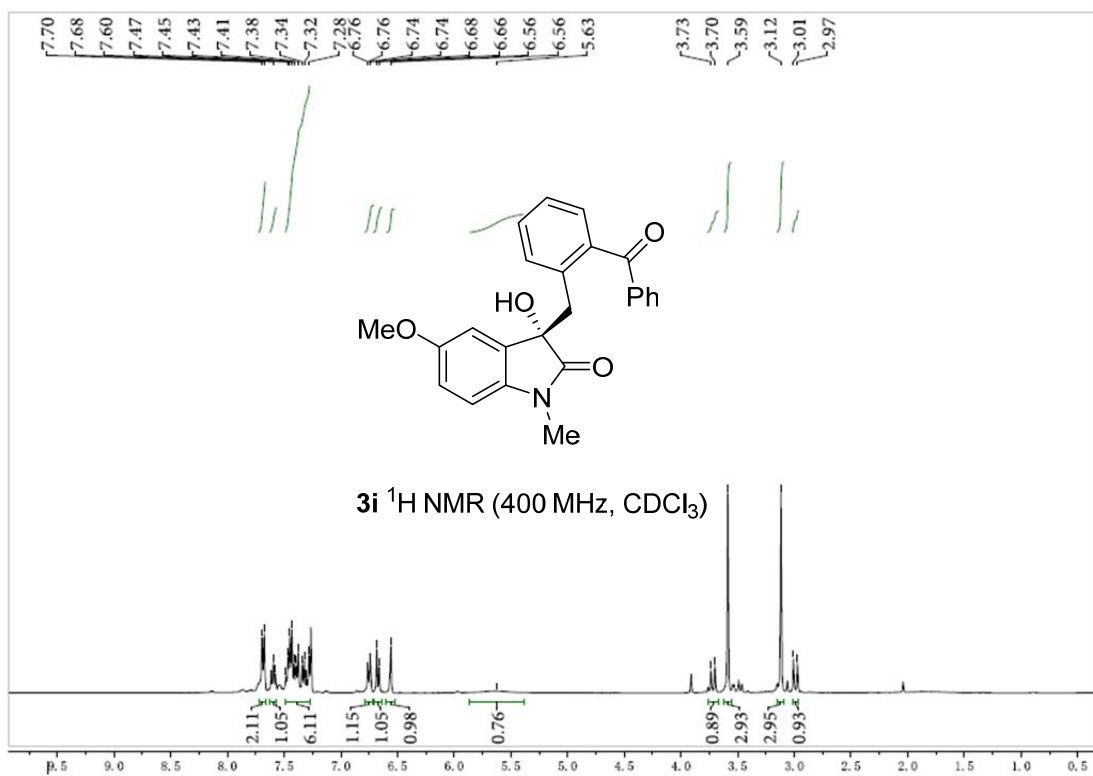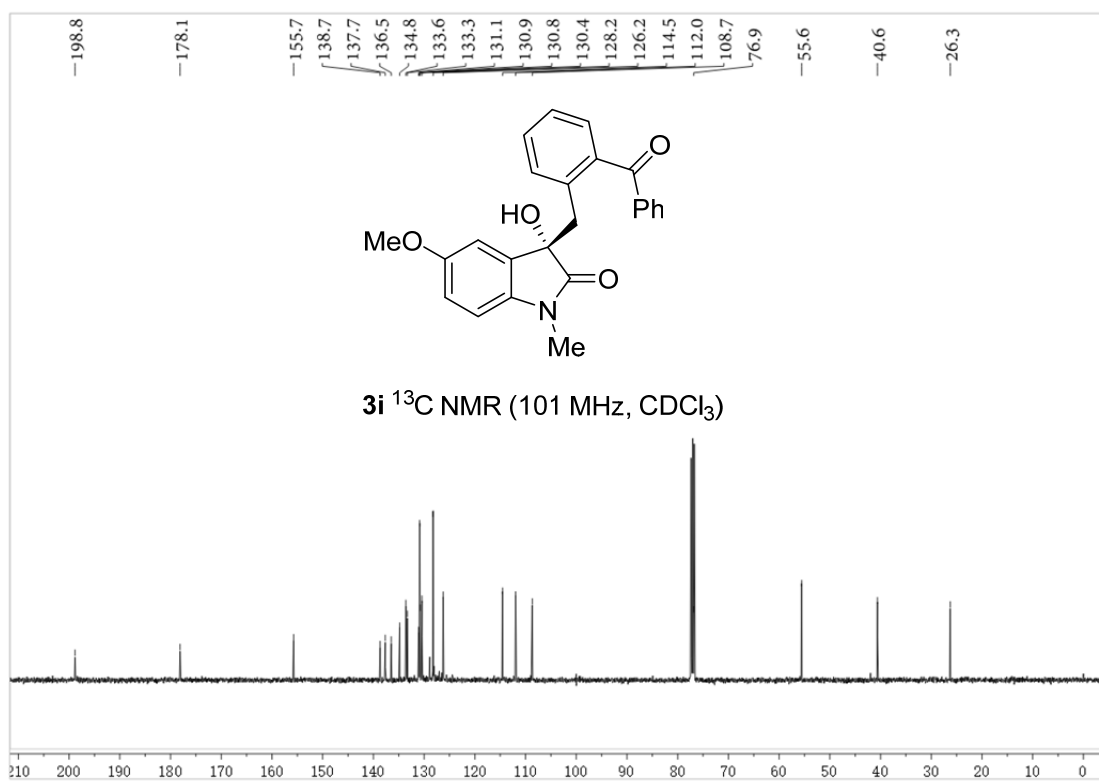

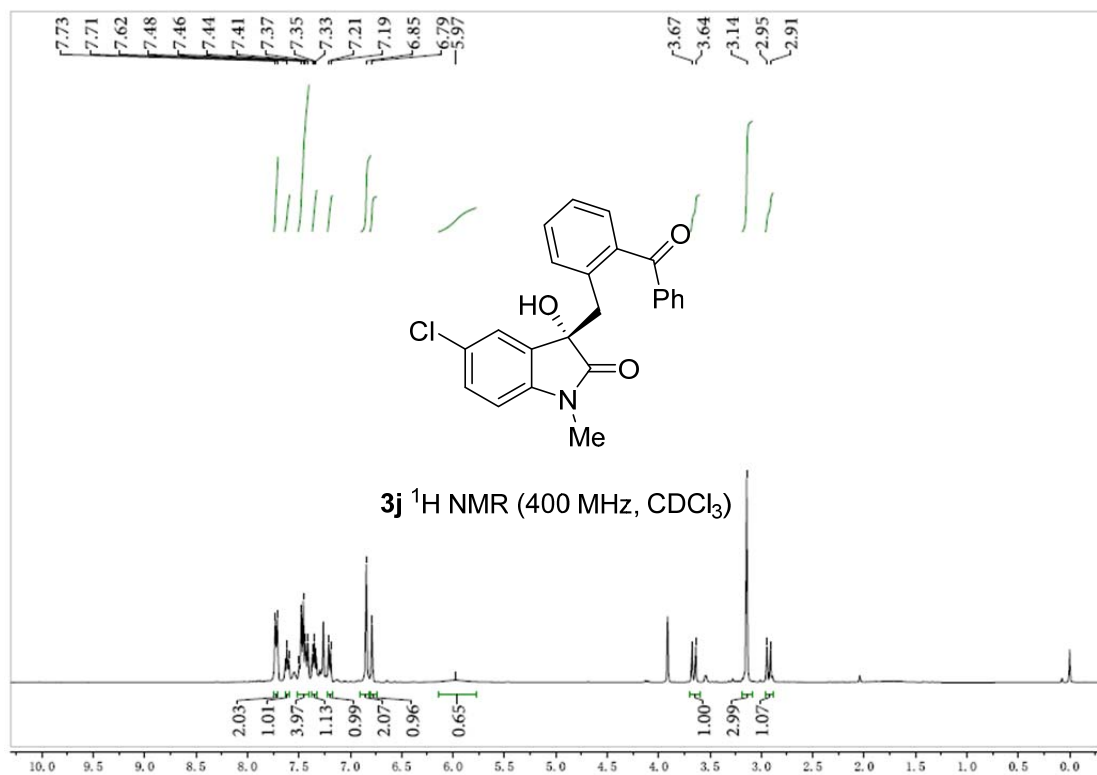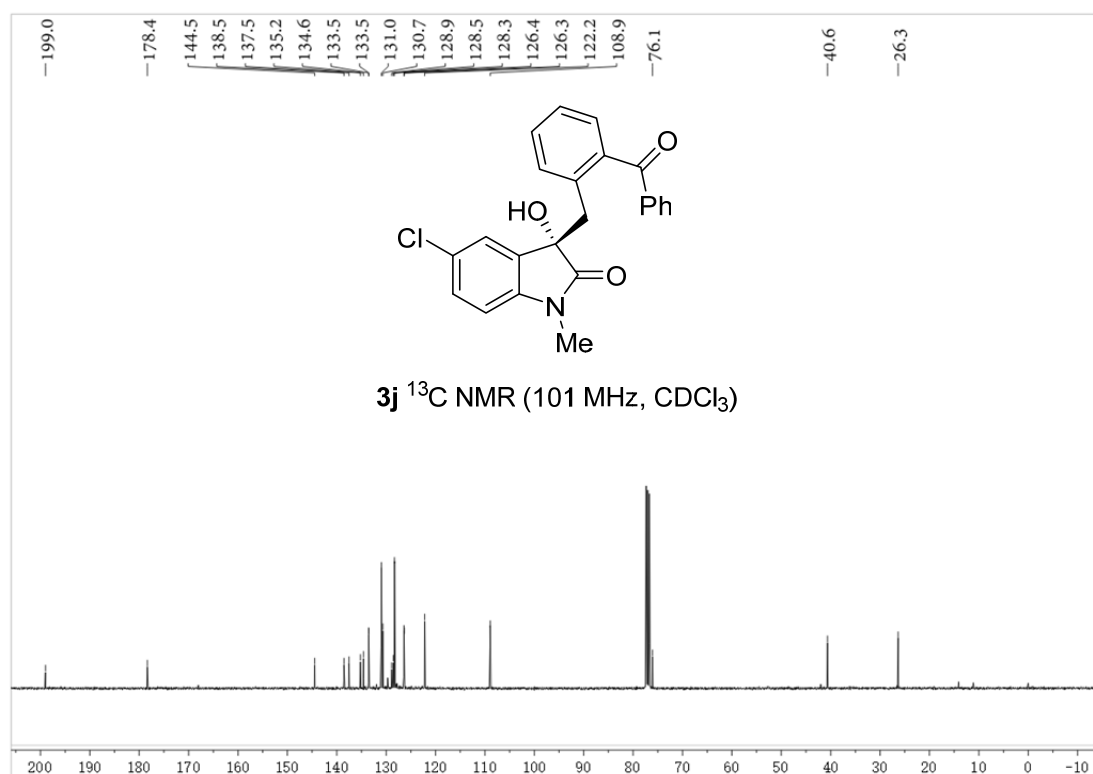

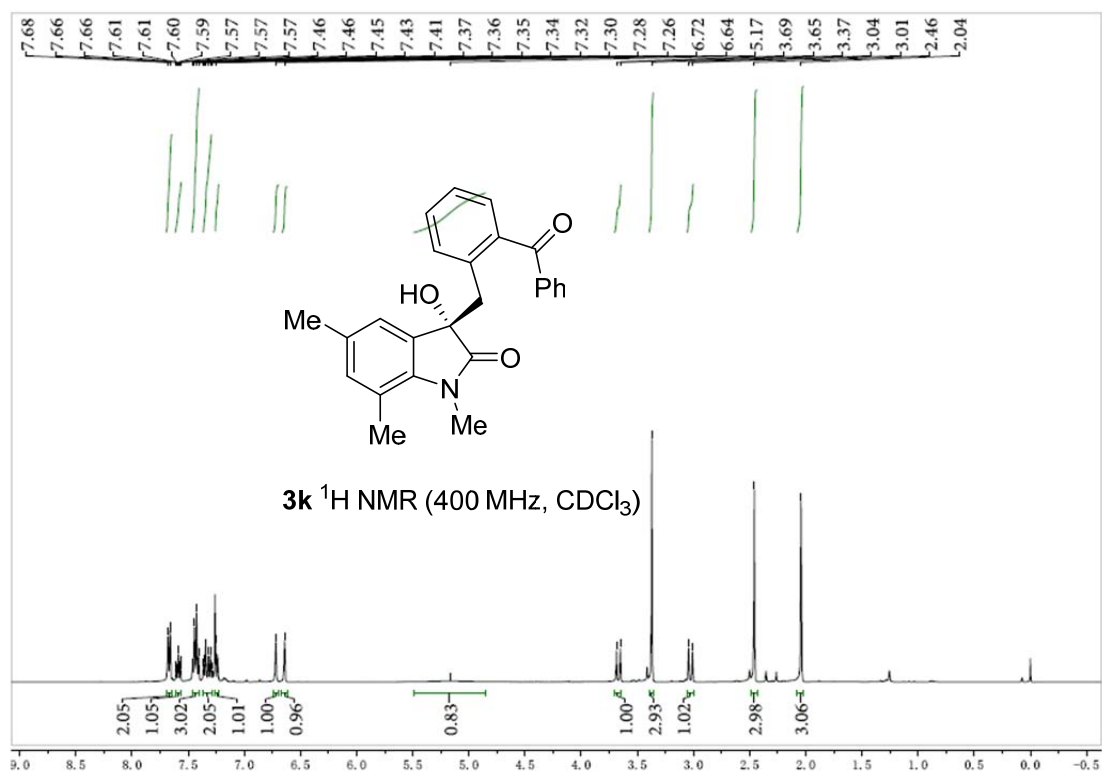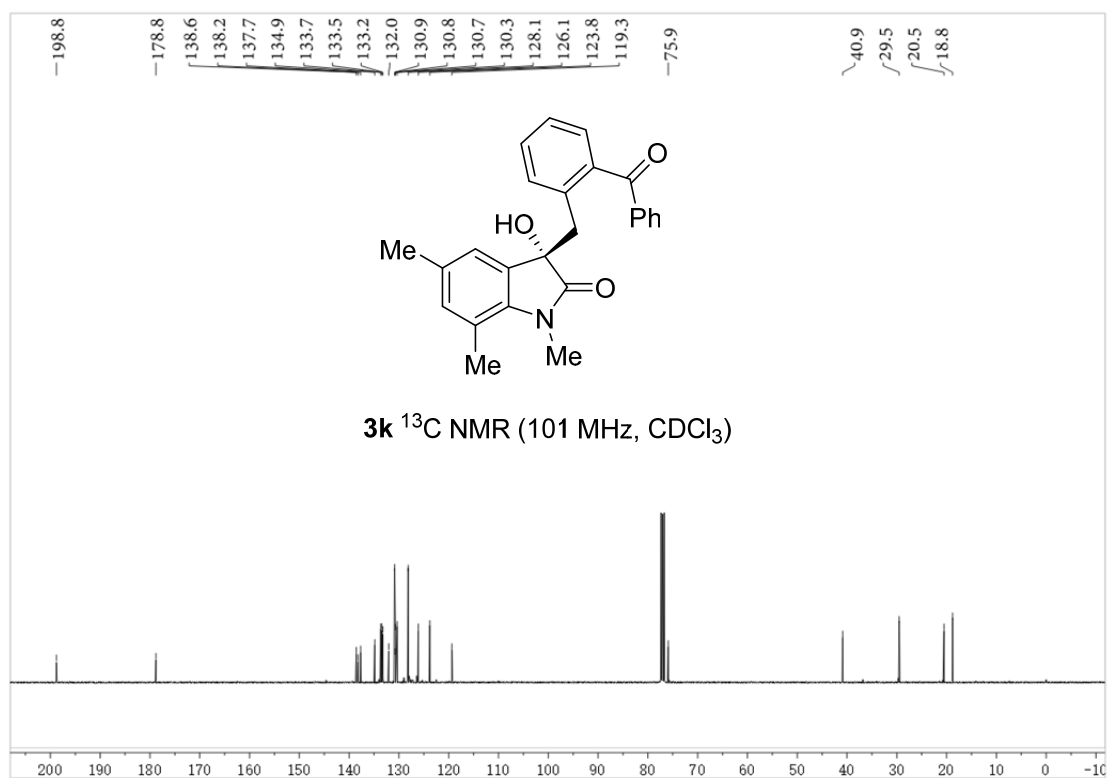

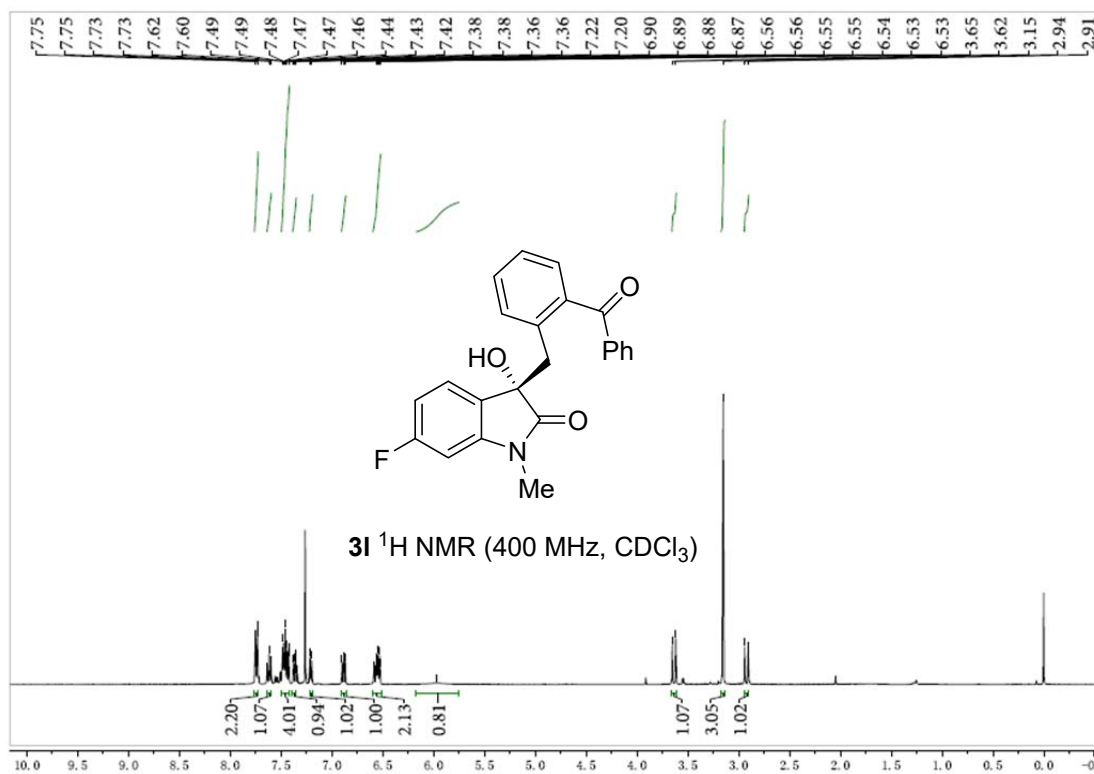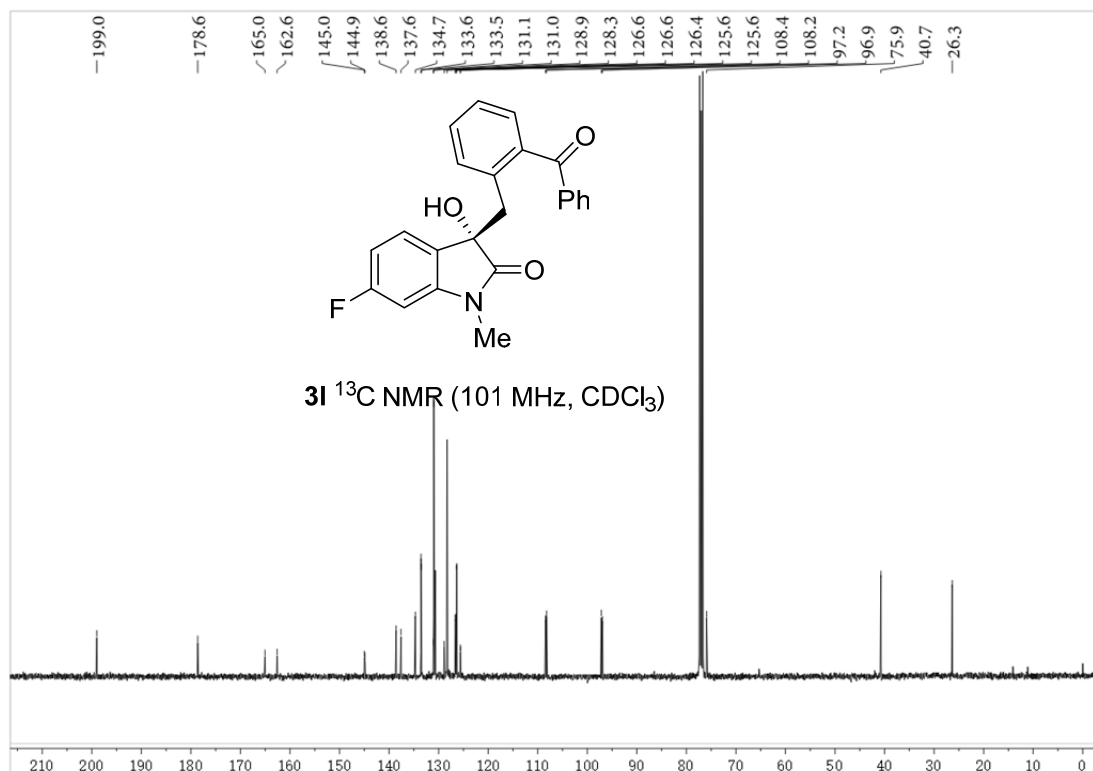

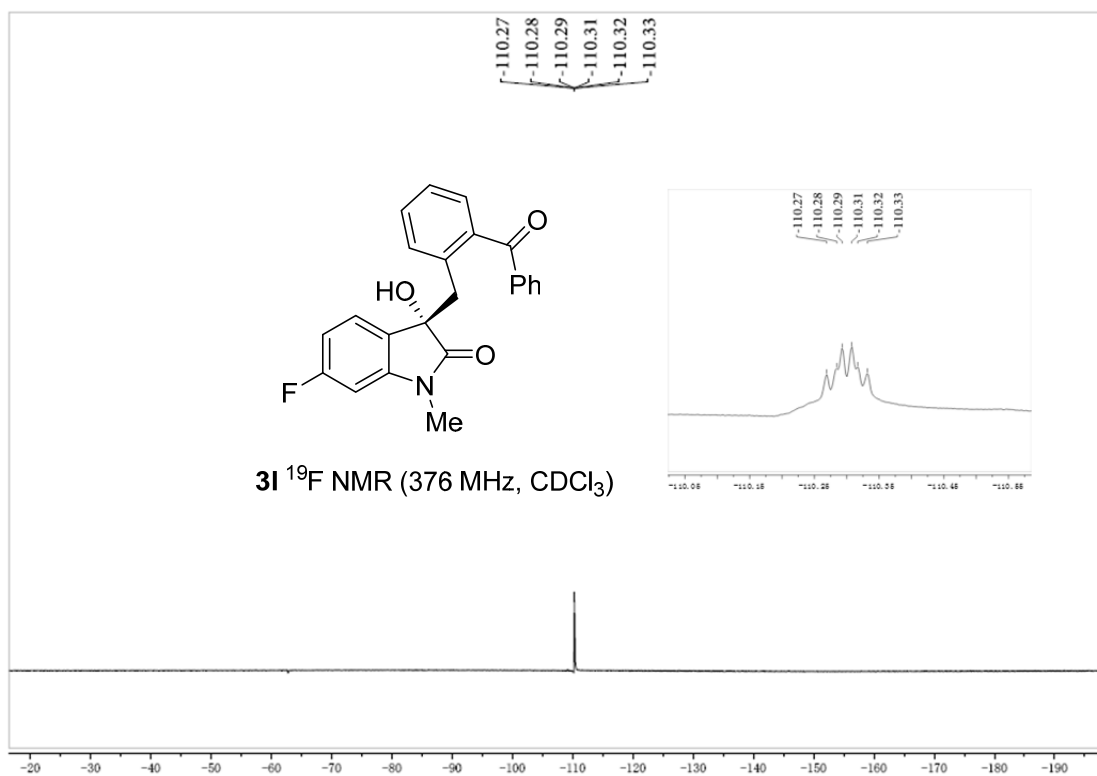



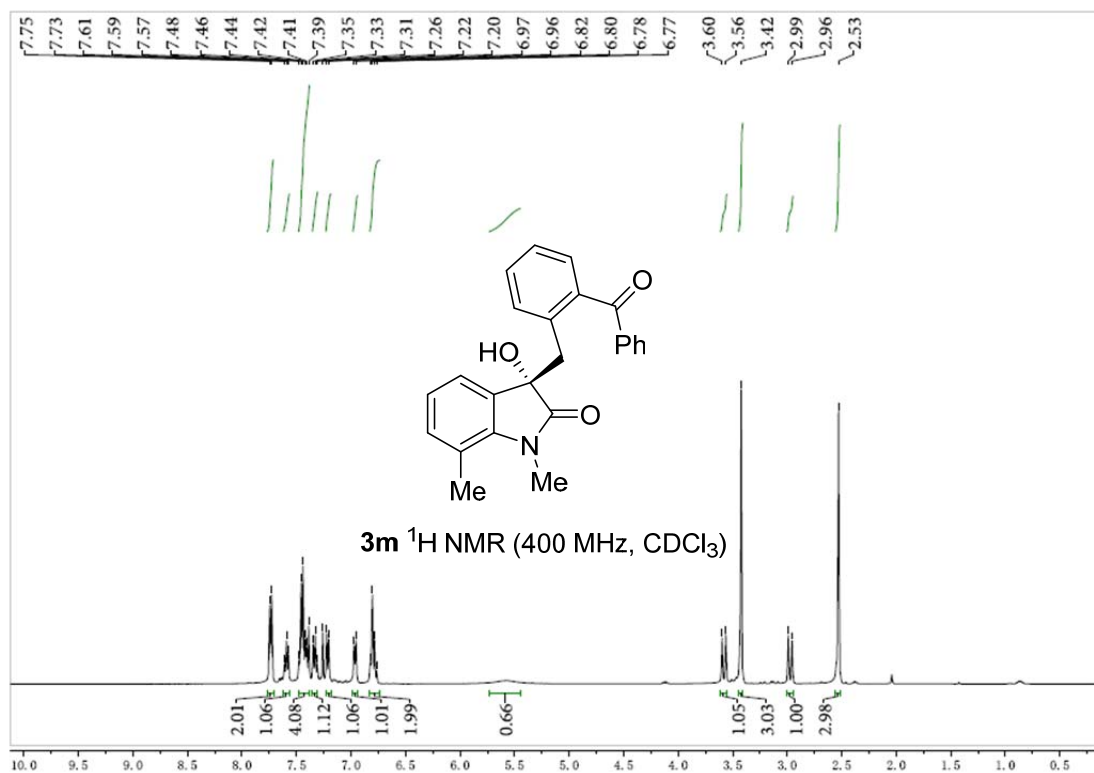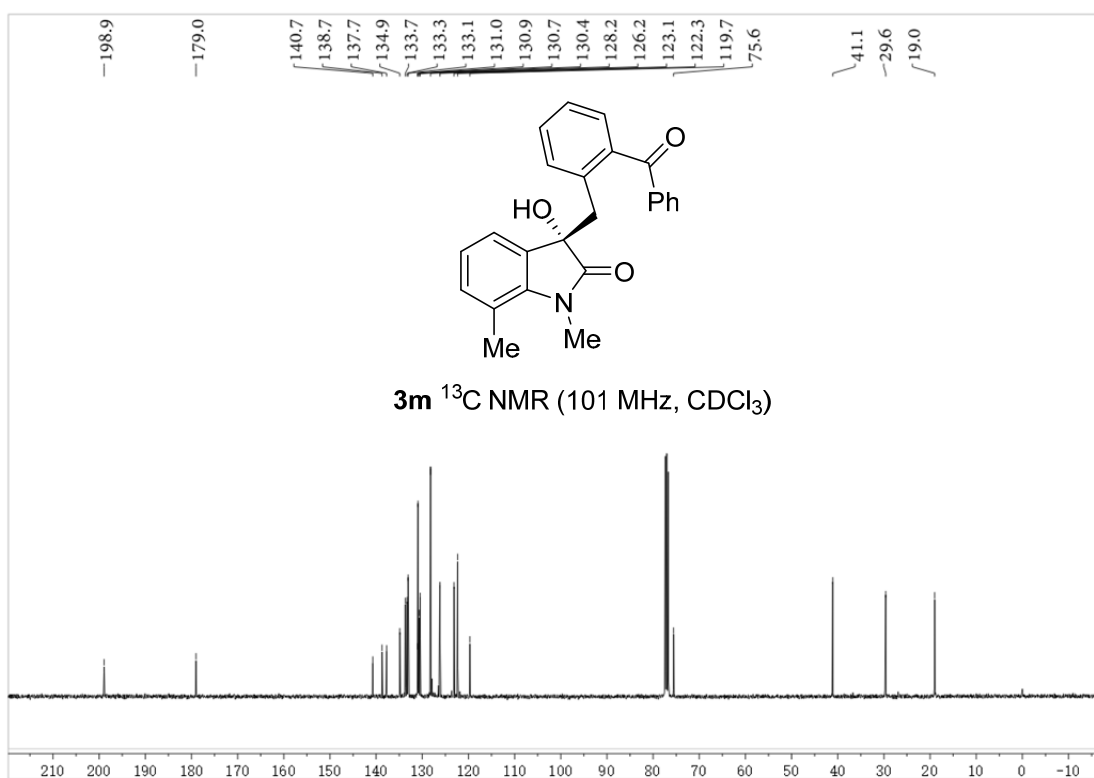

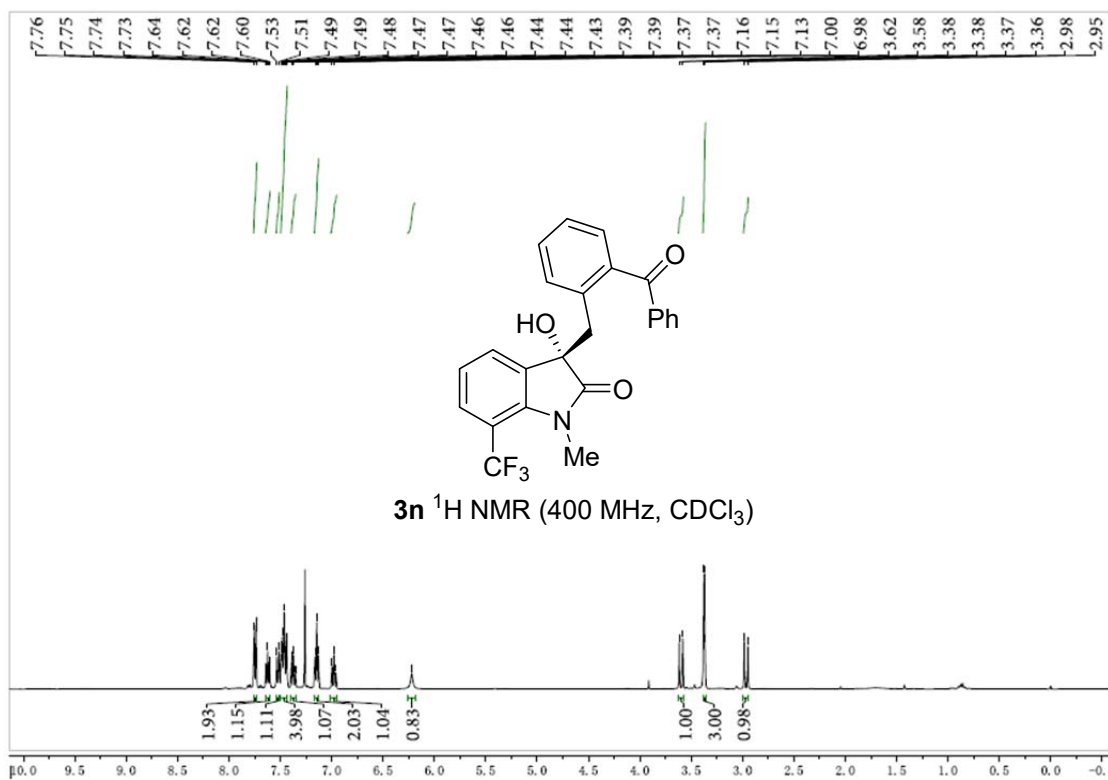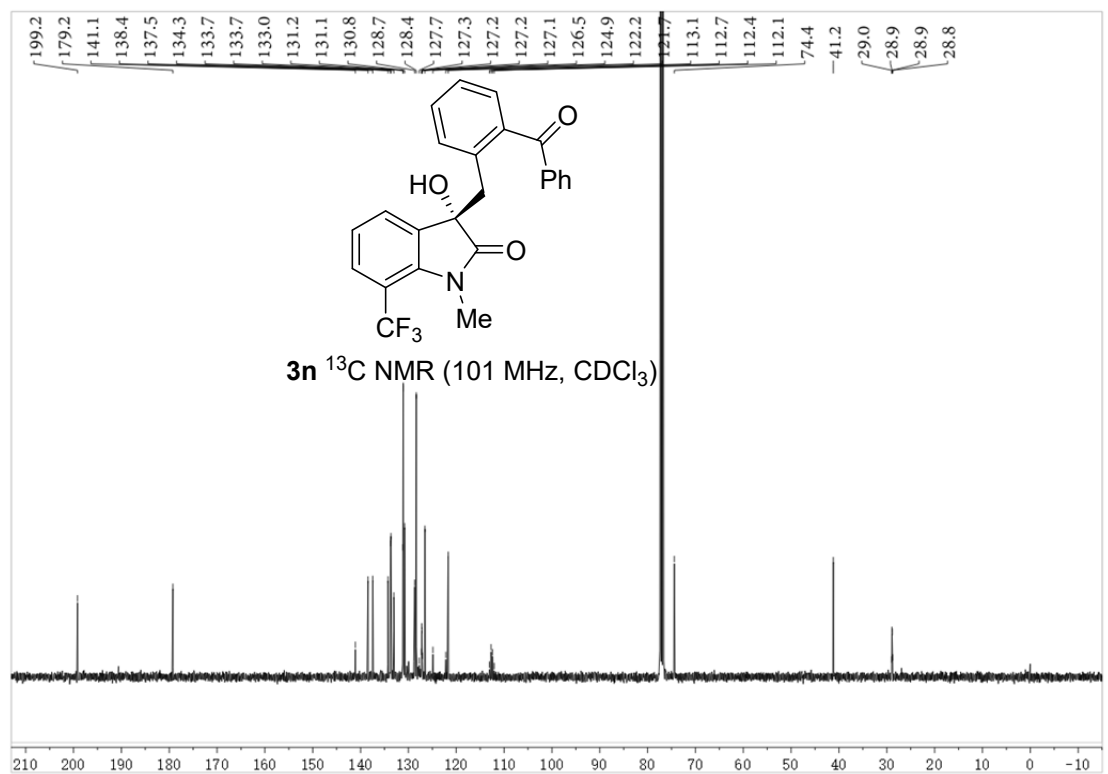

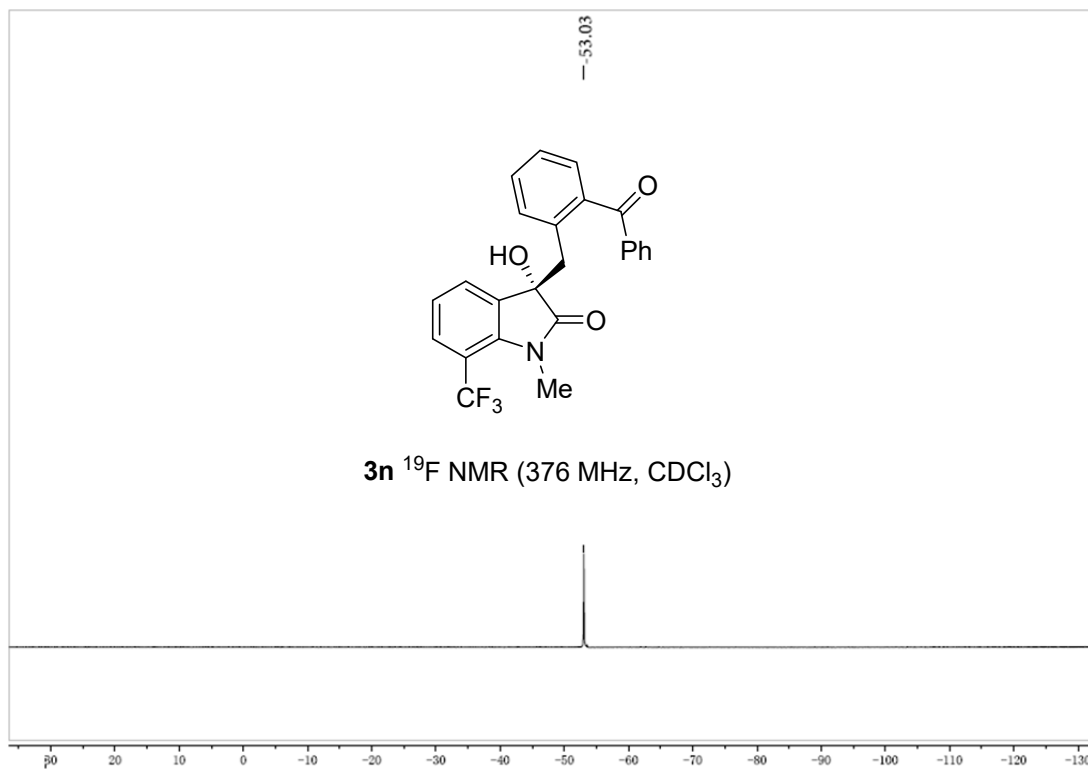

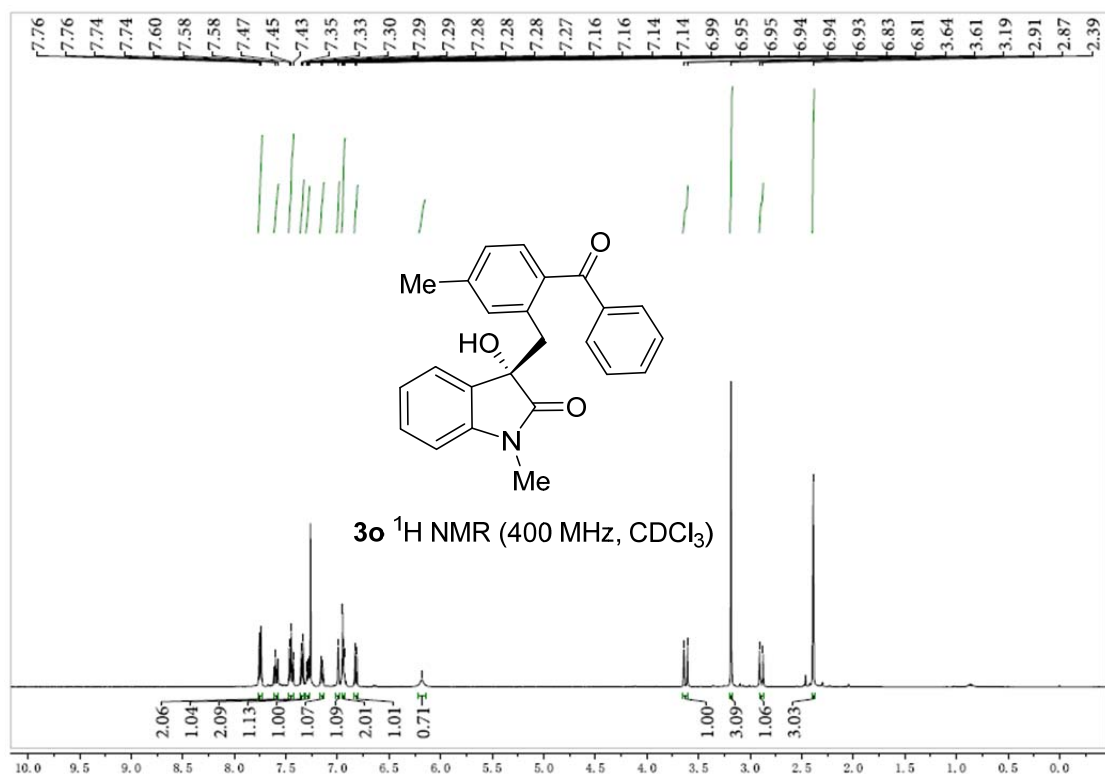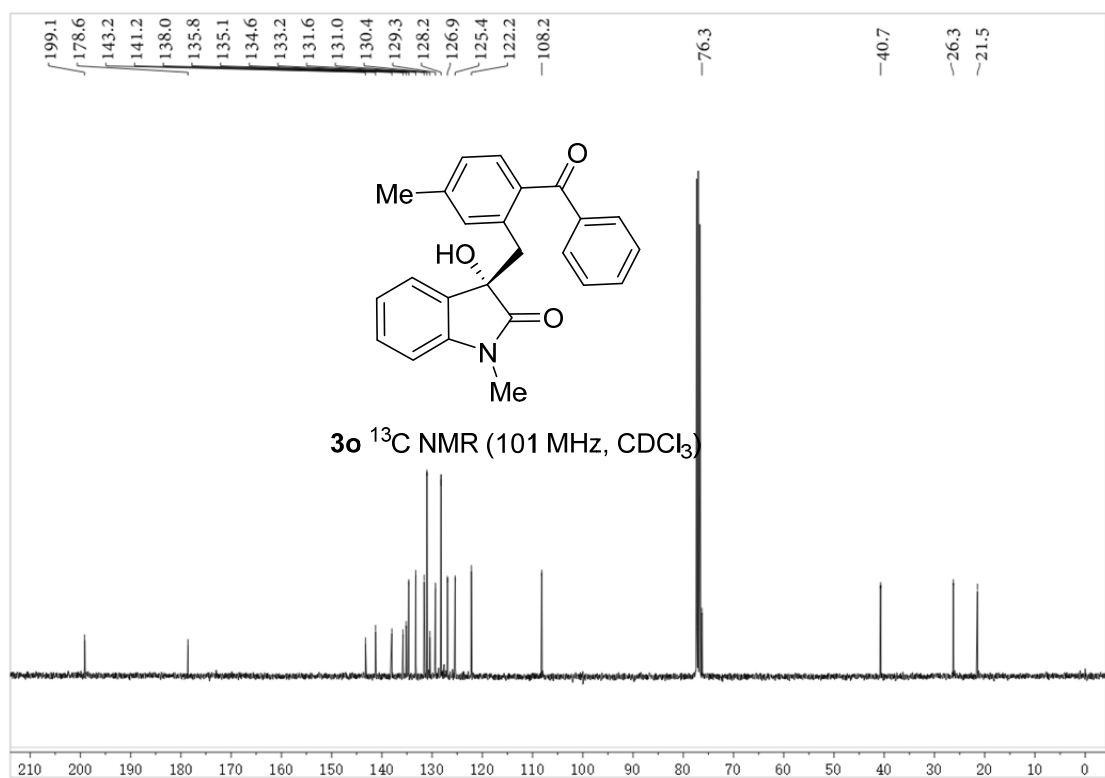

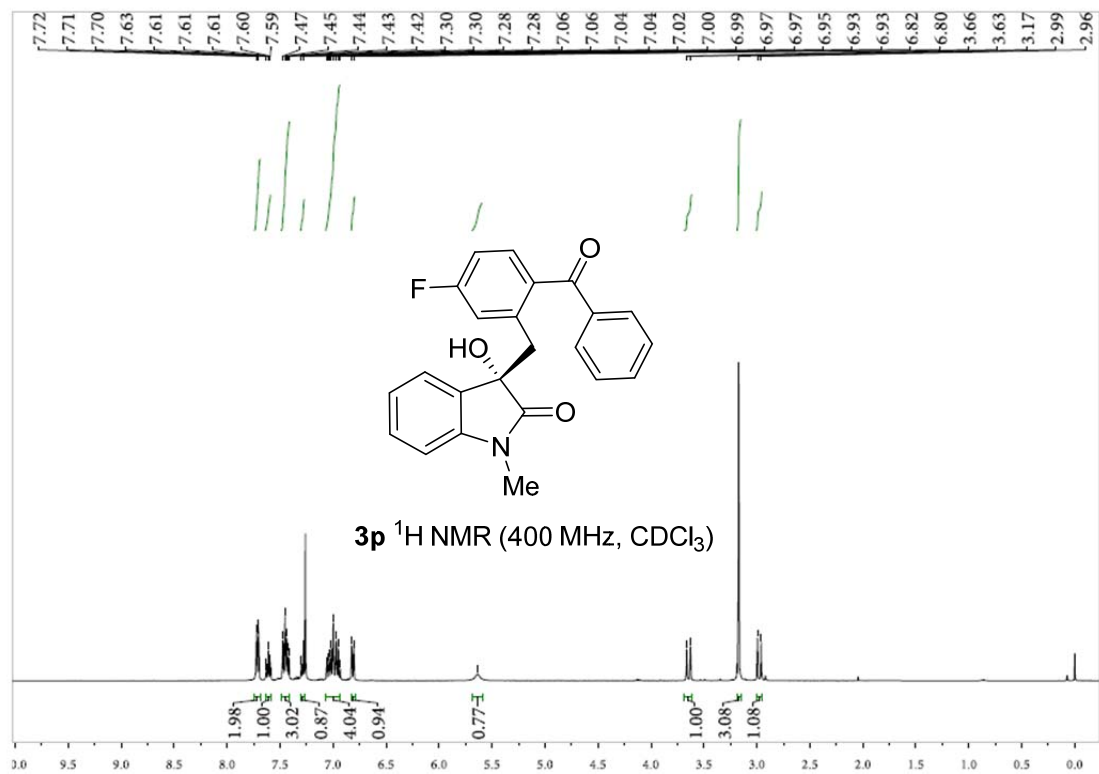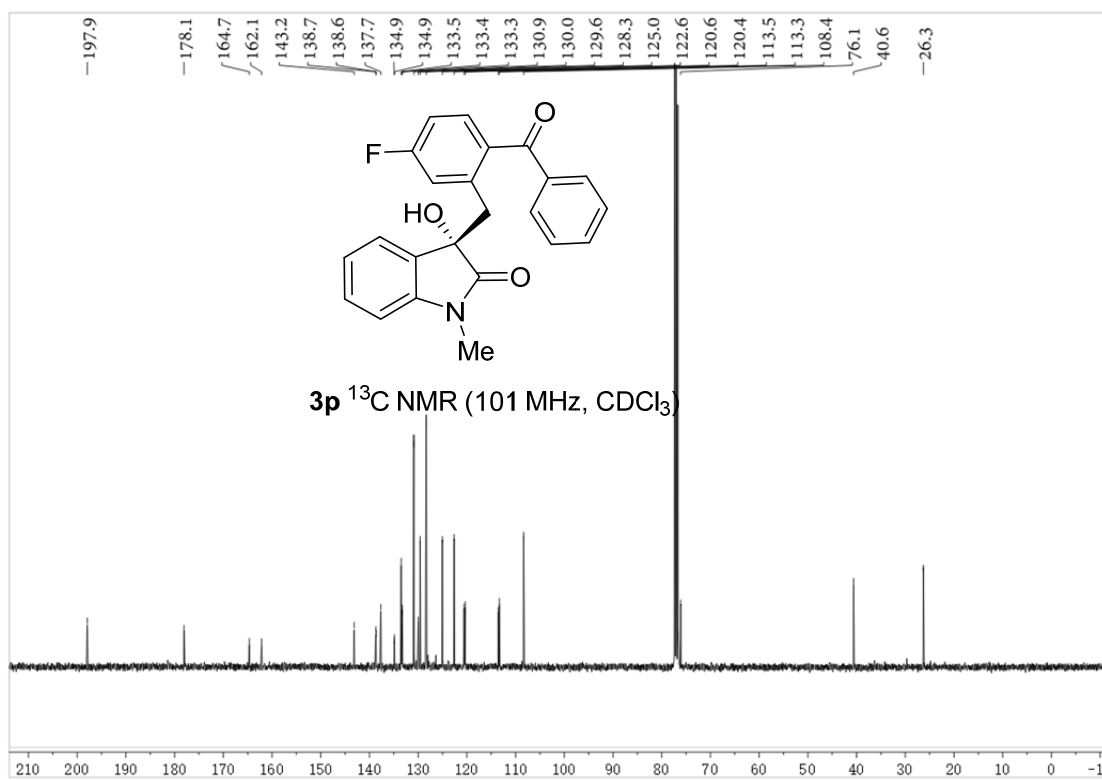

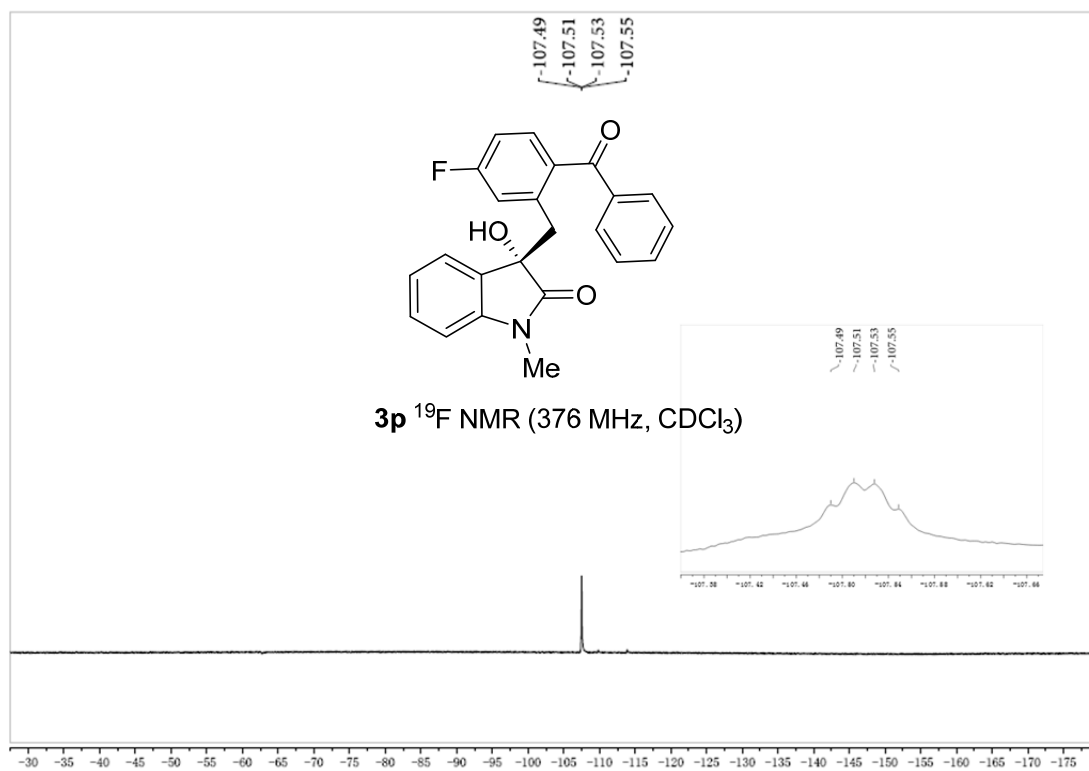

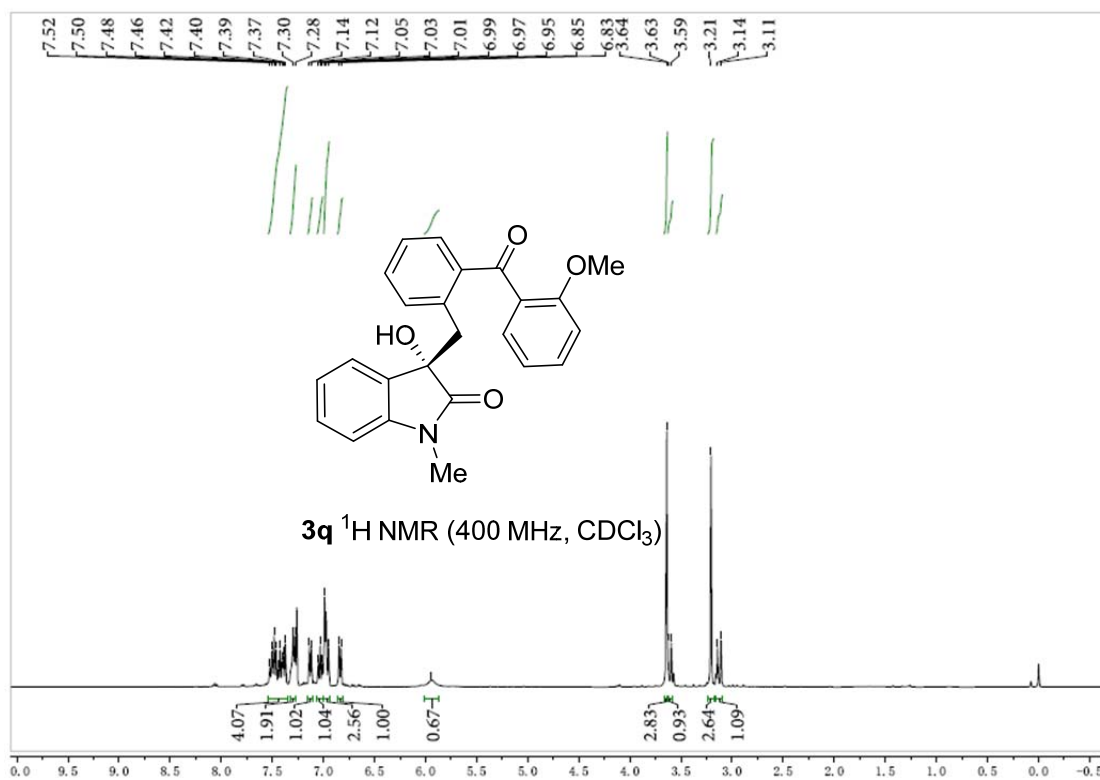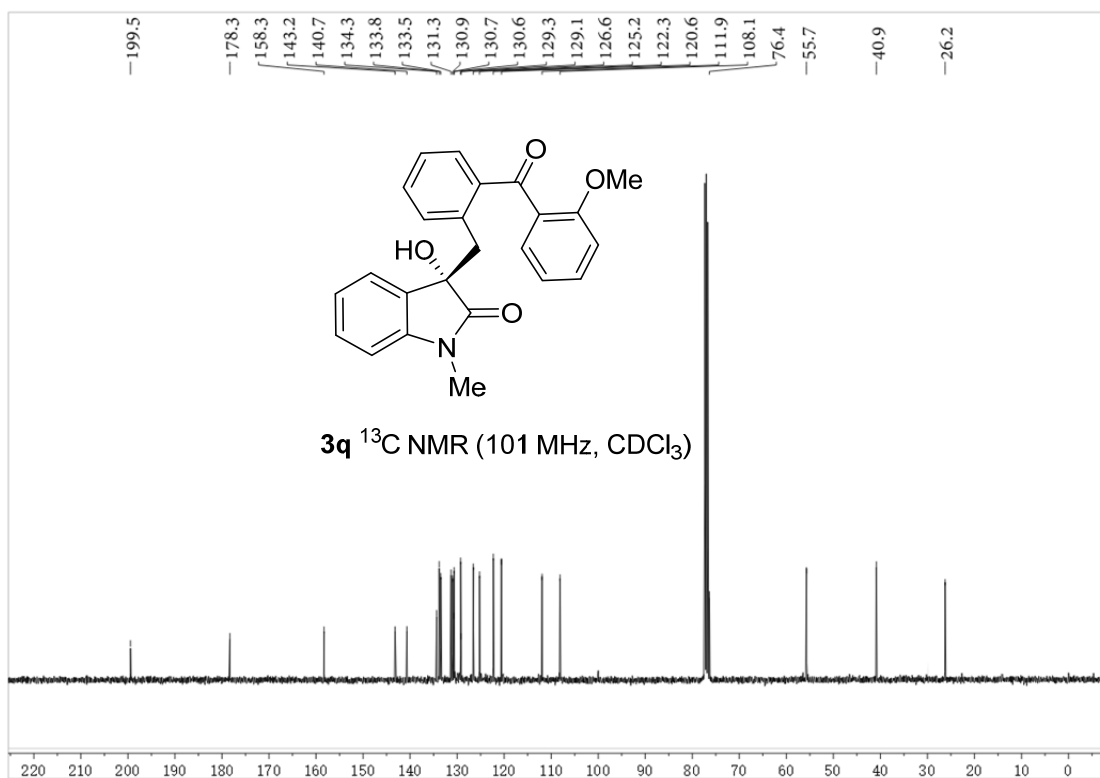

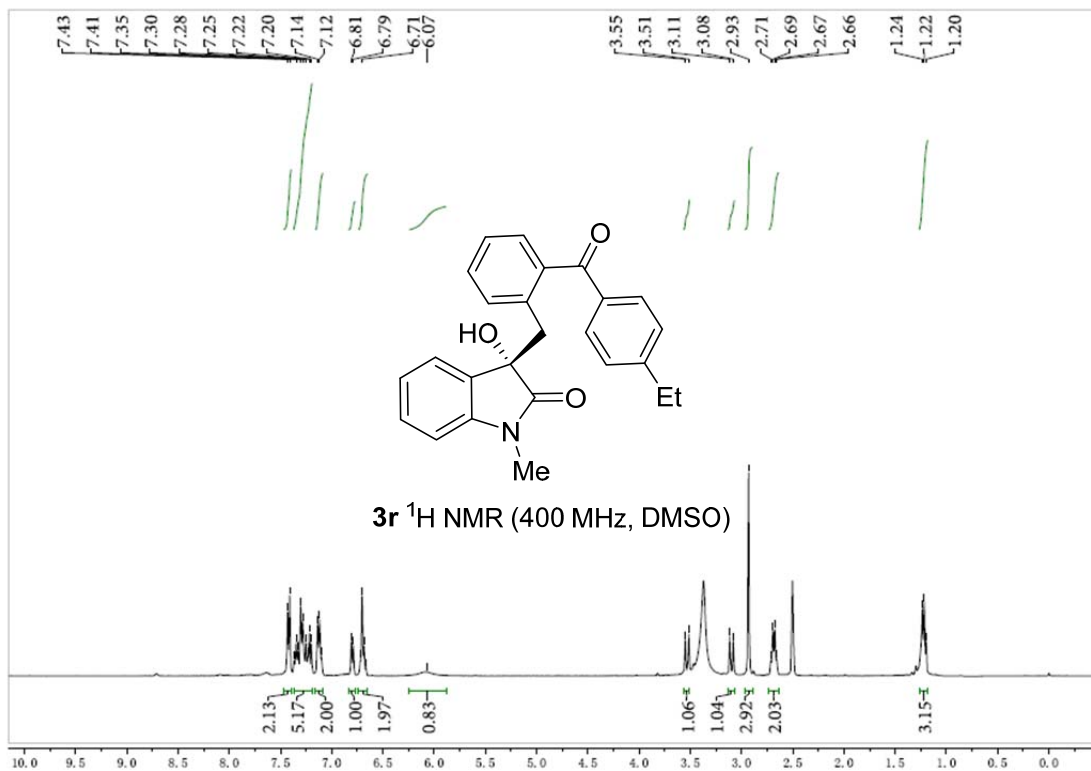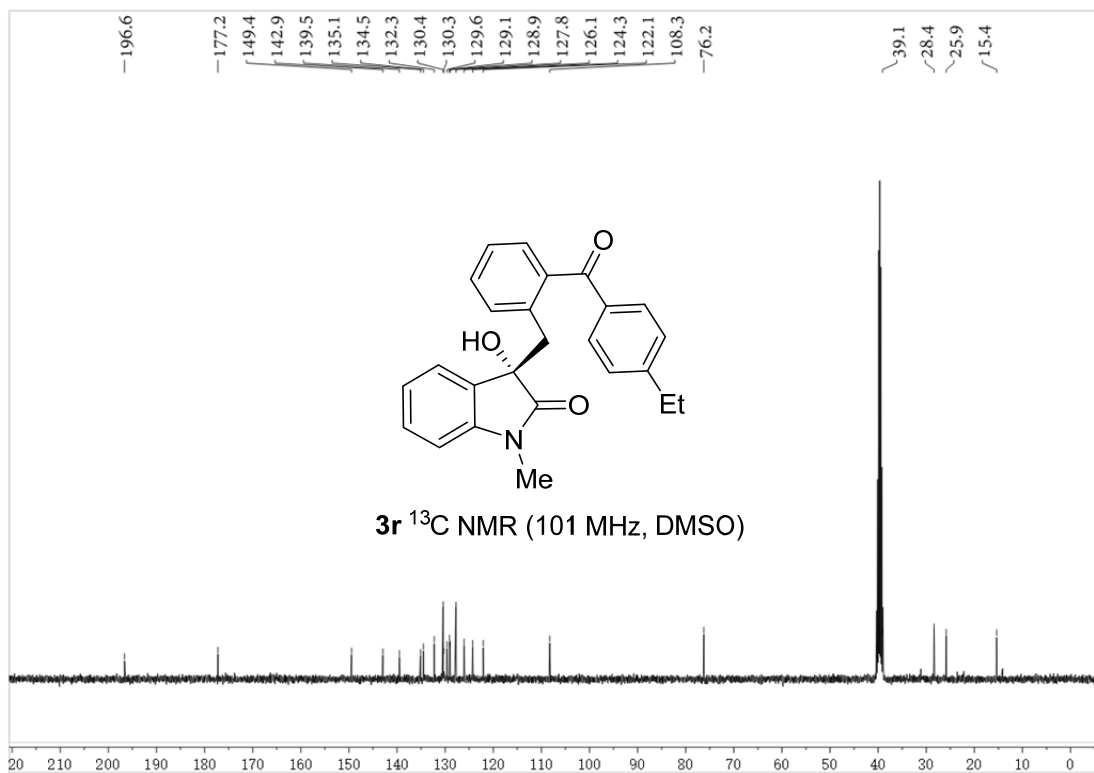



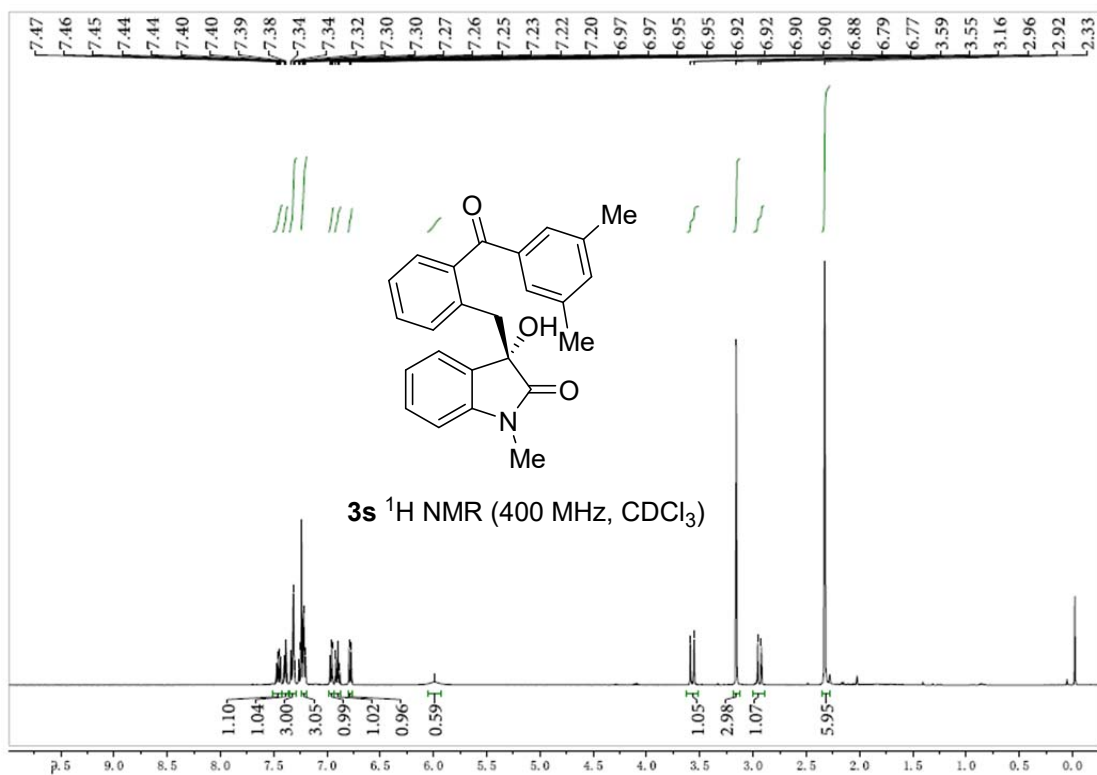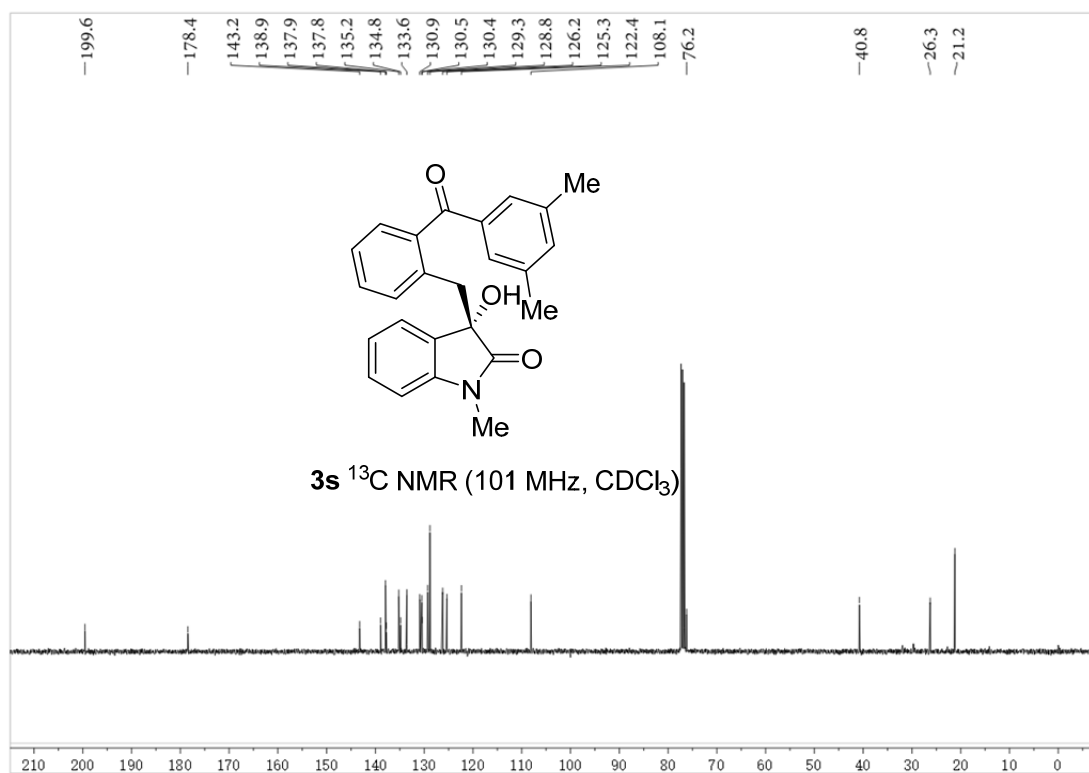

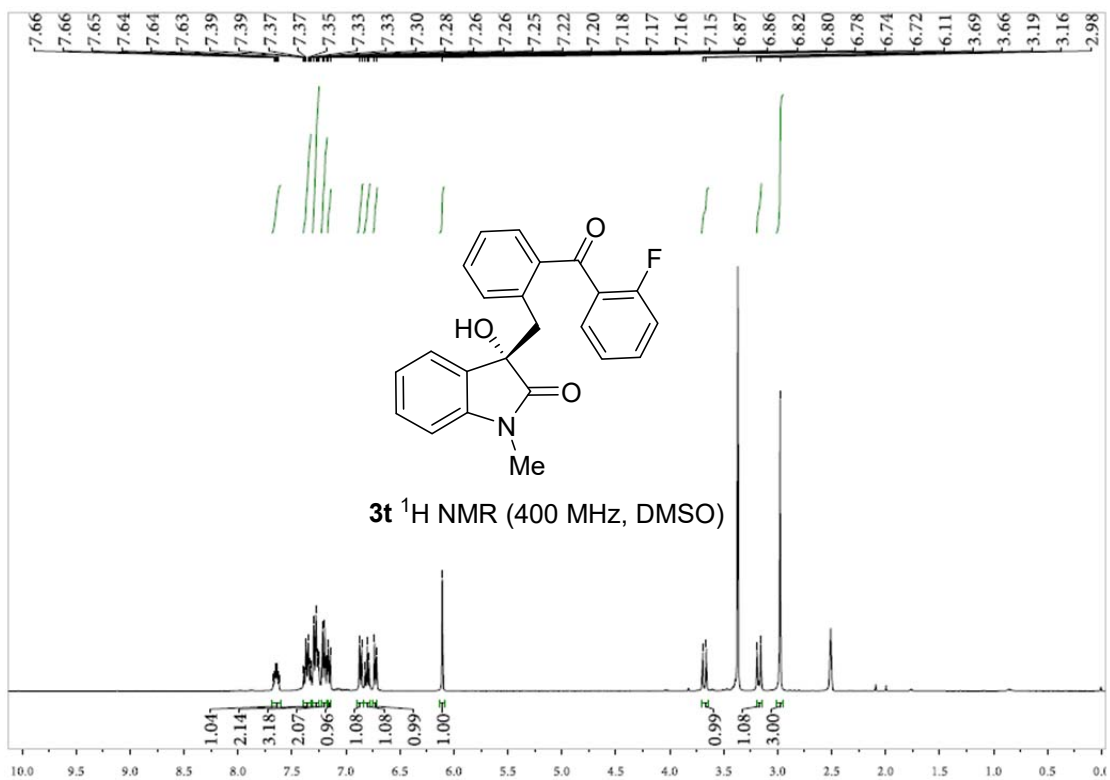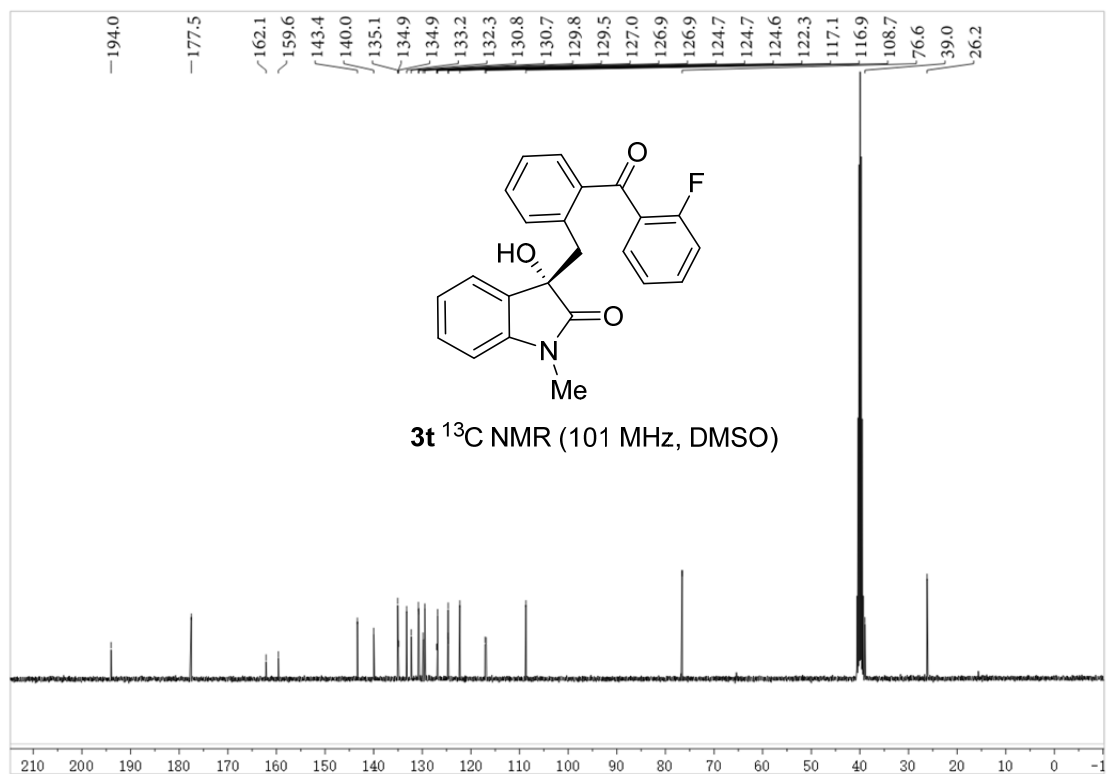

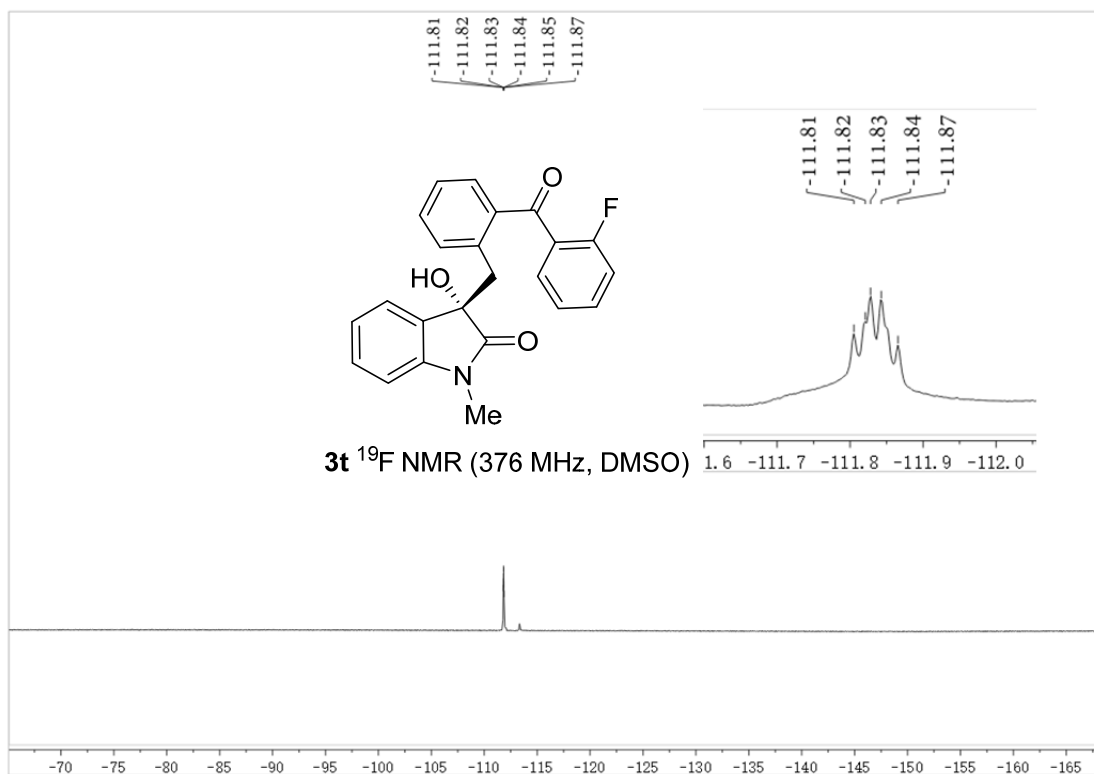

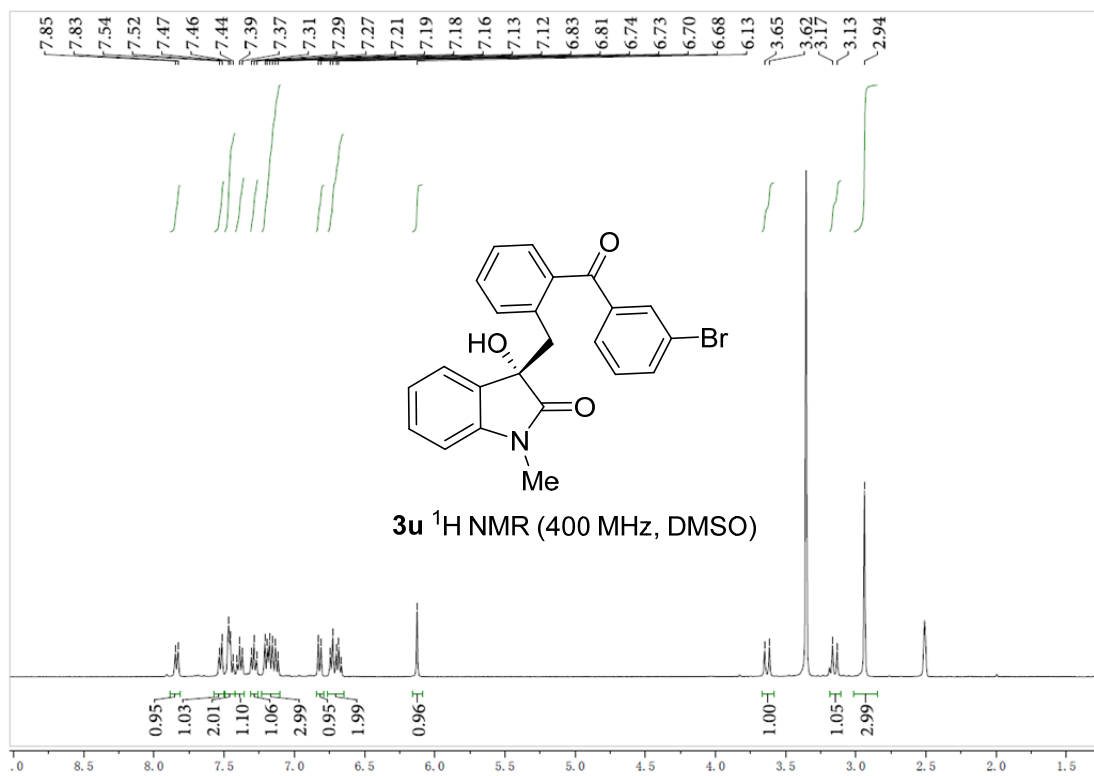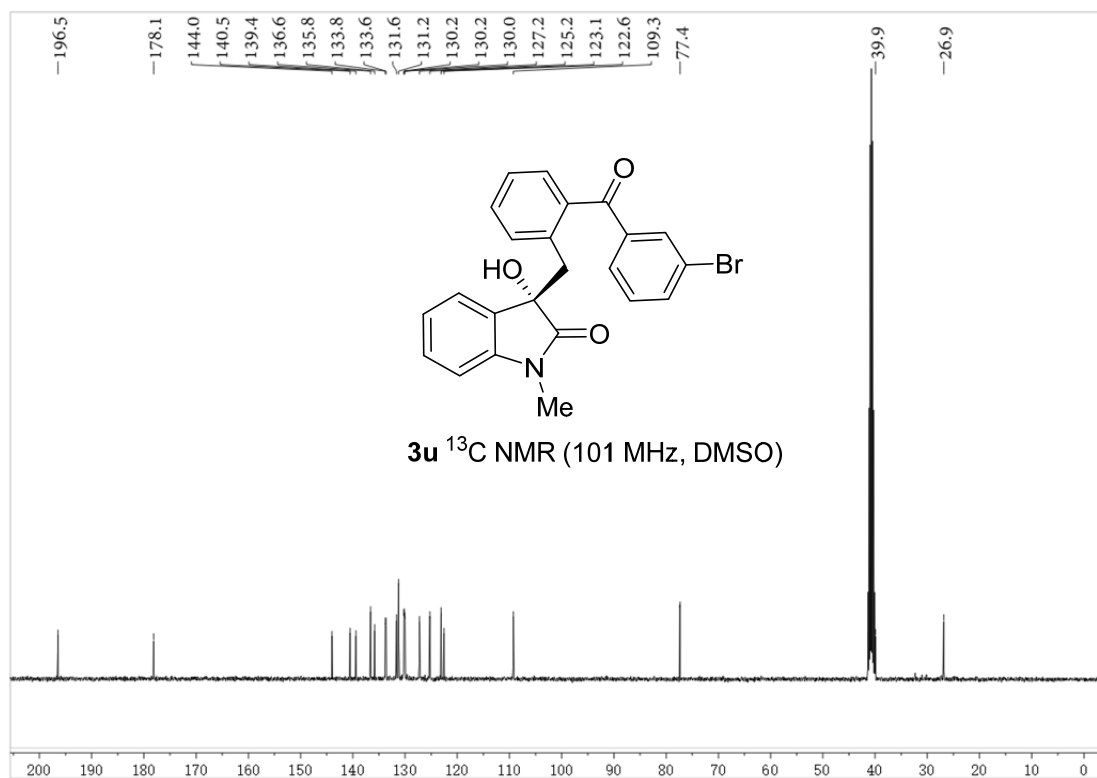

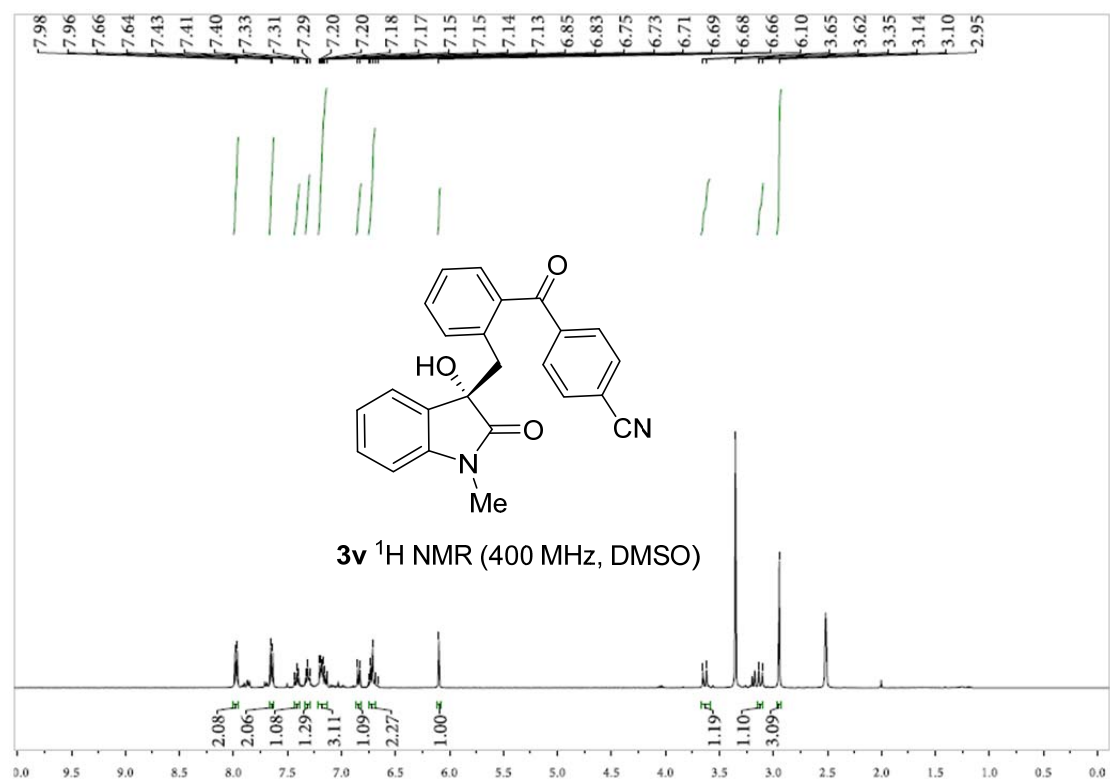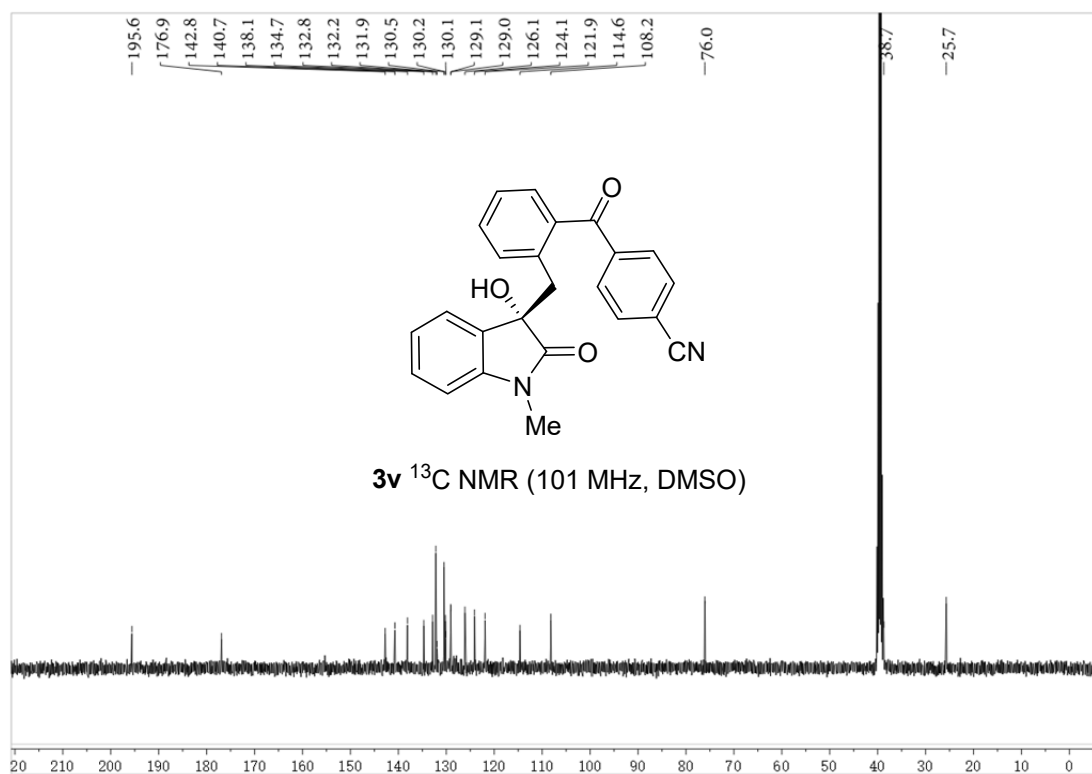

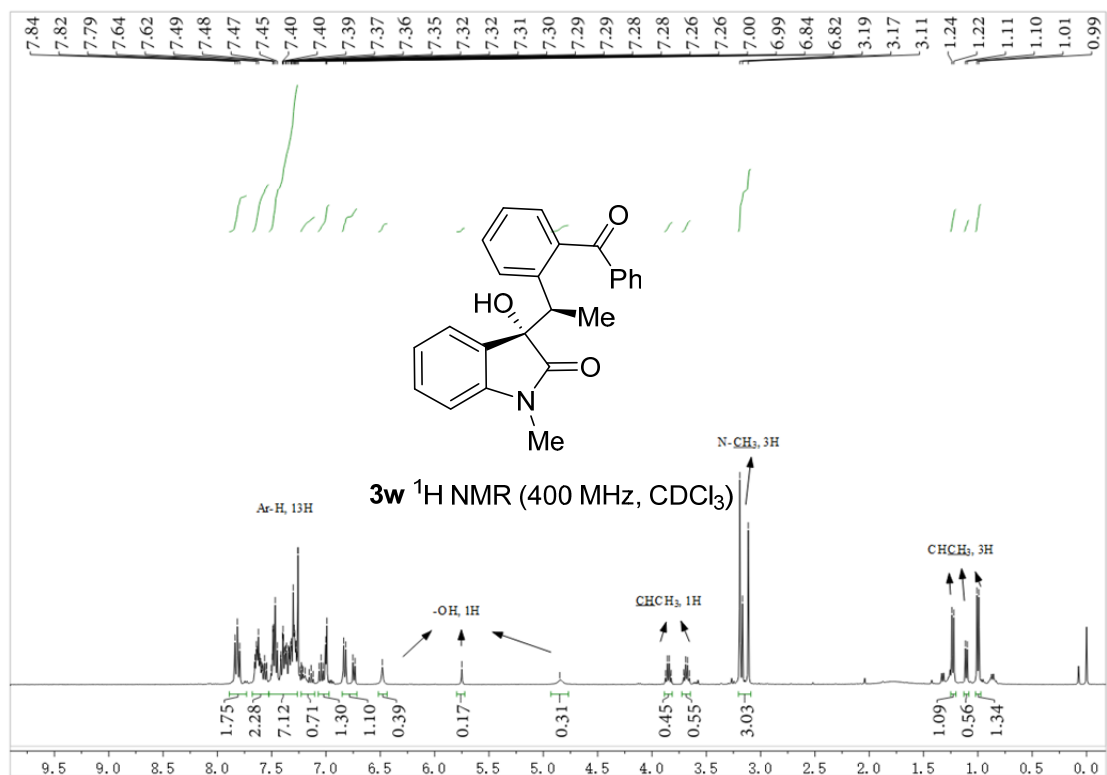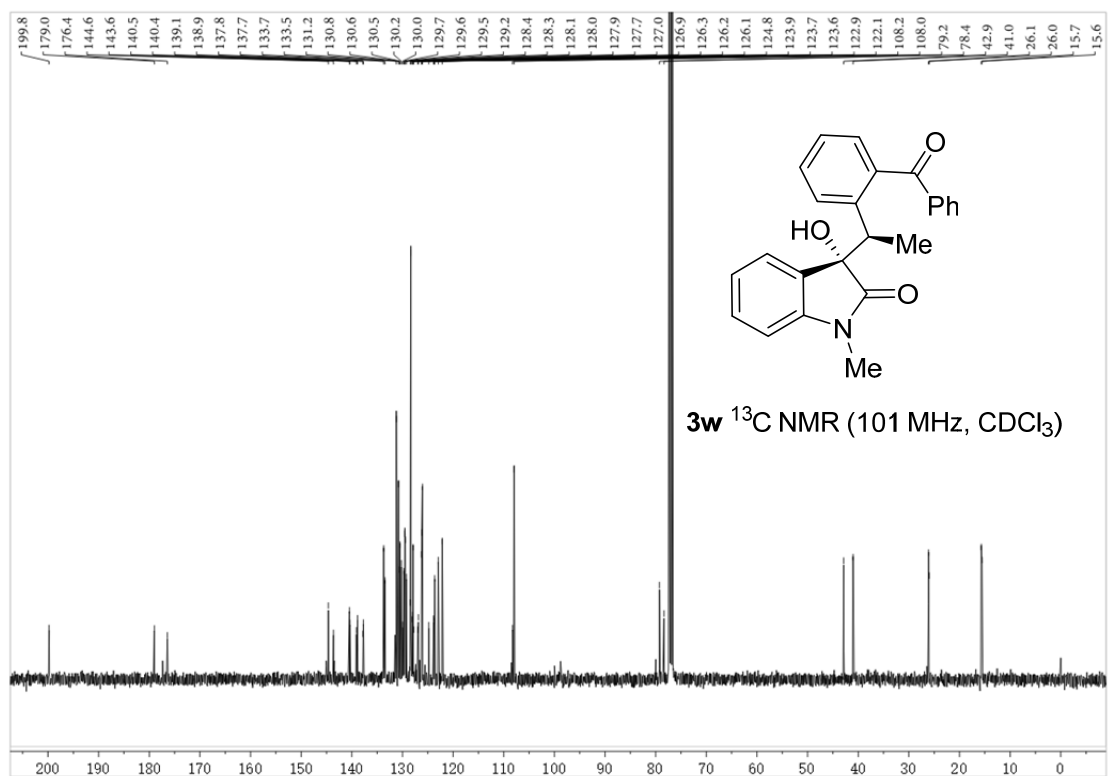

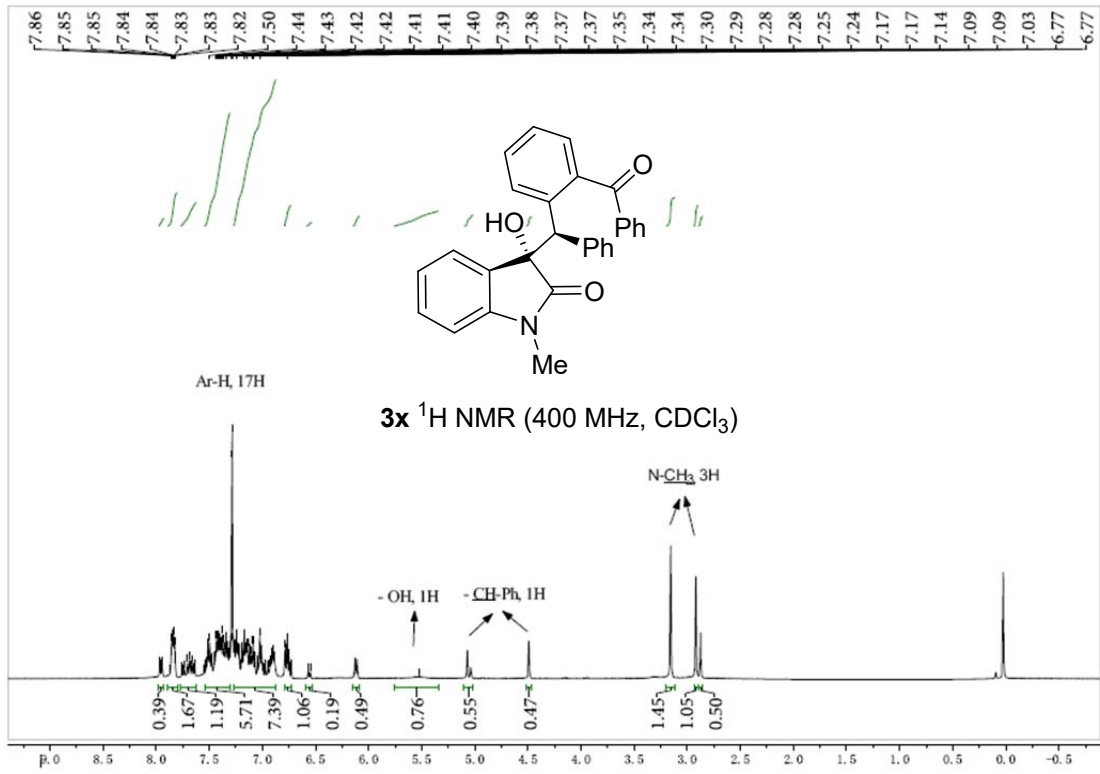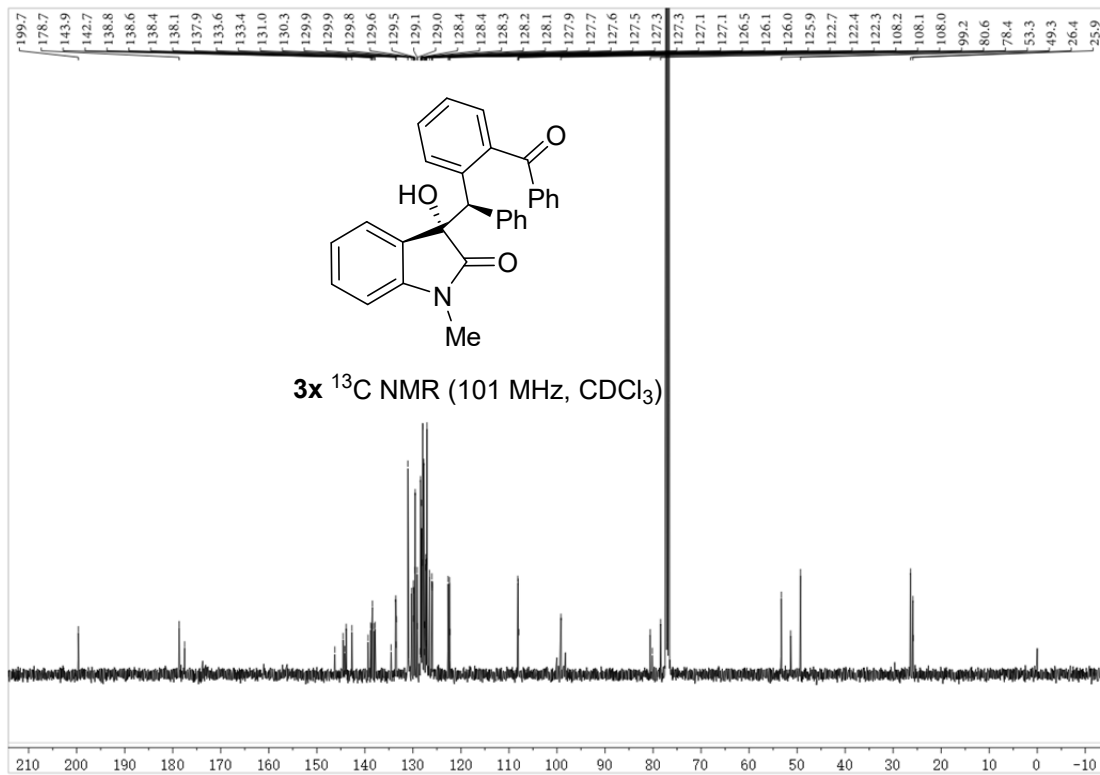

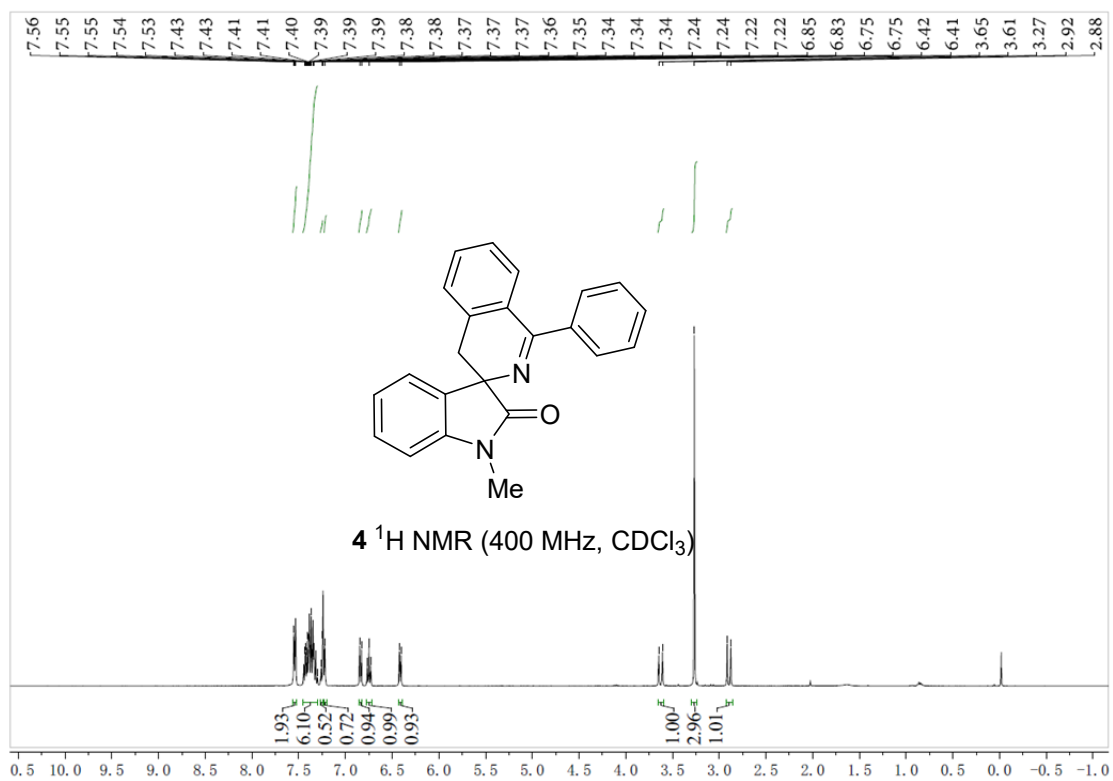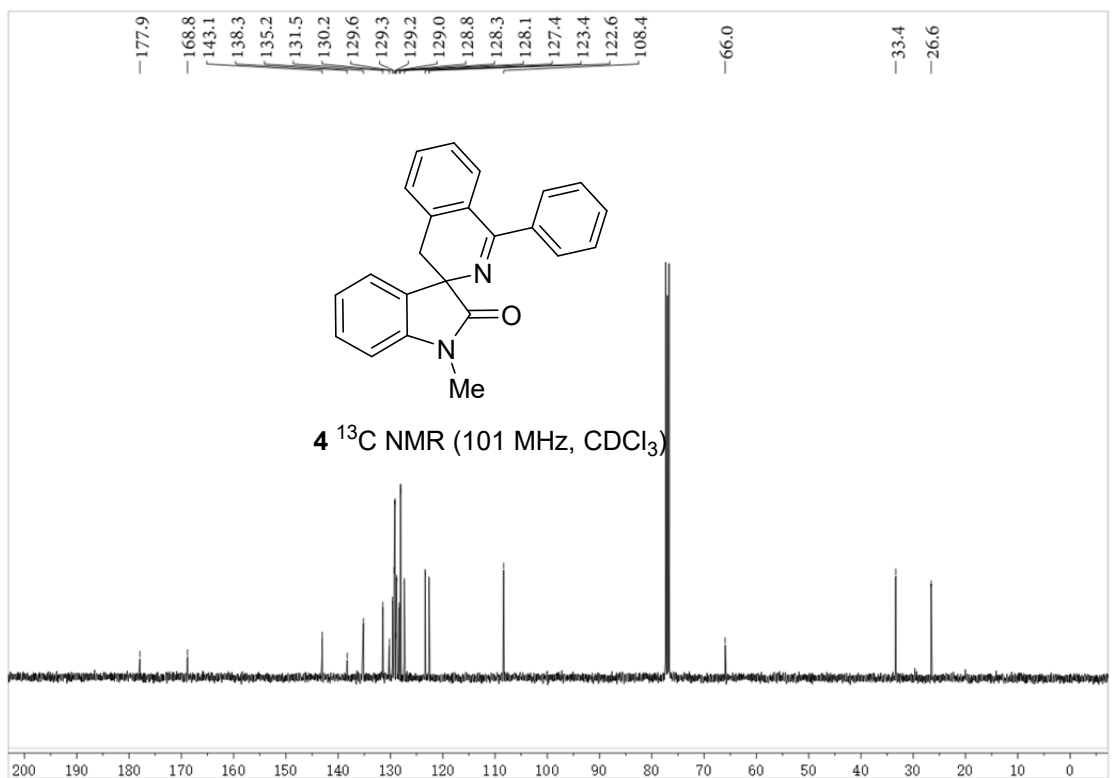



## 6. Chiral HPLC data

### HPLC parameters

| Compound  | Column             | Eluents                       | Flow rate |
|-----------|--------------------|-------------------------------|-----------|
| <b>3a</b> | Chiral AD-H column | Hexane/ <i>i</i> -PrOH(80/20) | 1mL/min   |
| <b>3b</b> | Chiral AD-H column | Hexane/ <i>i</i> -PrOH(80/20) | 1mL/min   |
| <b>3c</b> | Chiral AD-H column | Hexane/ <i>i</i> -PrOH(80/20) | 1mL/min   |
| <b>3d</b> | Chiral AD-H column | Hexane/ <i>i</i> -PrOH(80/20) | 1mL/min   |
| <b>3e</b> | Chiral AD-H column | Hexane/ <i>i</i> -PrOH(80/20) | 1mL/min   |
| <b>3f</b> | Chiral IA column   | Hexane/ <i>i</i> -PrOH(80/20) | 1mL/min   |
| <b>3g</b> | Chiral AD-H column | Hexane/ <i>i</i> -PrOH(80/20) | 1mL/min   |
| <b>3h</b> | Chiral IA column   | Hexane/ <i>i</i> -PrOH(80/20) | 1mL/min   |
| <b>3i</b> | Chiral AD-H column | Hexane/ <i>i</i> -PrOH(80/20) | 1mL/min   |
| <b>3j</b> | Chiral AD-H column | Hexane/ <i>i</i> -PrOH(80/20) | 1mL/min   |
| <b>3k</b> | Chiral AD-H column | Hexane/ <i>i</i> -PrOH(90/10) | 1mL/min   |
| <b>3l</b> | Chiral AD-H column | Hexane/ <i>i</i> -PrOH(90/10) | 1mL/min   |
| <b>3m</b> | Chiral AD-H column | Hexane/ <i>i</i> -PrOH(80/20) | 1mL/min   |
| <b>3n</b> | Chiral AD-H column | Hexane/ <i>i</i> -PrOH(80/20) | 1mL/min   |
| <b>3o</b> | Chiral AD-H column | Hexane/ <i>i</i> -PrOH(80/20) | 1mL/min   |
| <b>3p</b> | Chiral AD-H column | Hexane/ <i>i</i> -PrOH(80/20) | 1mL/min   |
| <b>3q</b> | Chiral AD-H column | Hexane/ <i>i</i> -PrOH(80/20) | 1mL/min   |
| <b>3r</b> | Chiral AD-H column | Hexane/ <i>i</i> -PrOH(80/20) | 1mL/min   |
| <b>3s</b> | Chiral OD column   | Hexane/ <i>i</i> -PrOH(97/3)  | 1mL/min   |
| <b>3t</b> | Chiral AD-H column | Hexane/ <i>i</i> -PrOH(80/20) | 1mL/min   |
| <b>3u</b> | Chiral AD-H column | Hexane/ <i>i</i> -PrOH(85/15) | 1mL/min   |
| <b>3v</b> | Chiral AS column   | Hexane/ <i>i</i> -PrOH(80/20) | 1mL/min   |
| <b>3w</b> | Chiral IC column   | Hexane/ <i>i</i> -PrOH(70/30) | 1mL/min   |
| <b>3x</b> | Chiral IC column   | Hexane/ <i>i</i> -PrOH(70/30) | 1mL/min   |
| <b>4</b>  | Chiral AD-H column | Hexane/ <i>i</i> -PrOH(80/20) | 1mL/min   |

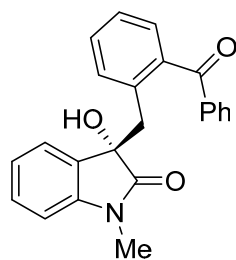

**3a**

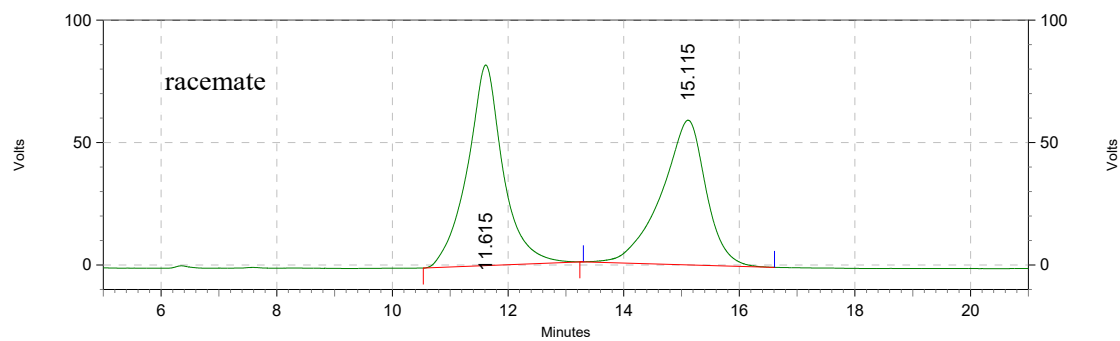

**UV1000-254nm**

**Results**

| Retention time | Area    | Area%   | Height | Height% |
|----------------|---------|---------|--------|---------|
| 11.615         | 3511714 | 51.619  | 81917  | 58.094  |
| 15.115         | 3162135 | 48.381  | 59091  | 41.906  |
| Totals         | 6673849 | 100.000 | 141008 | 100.000 |

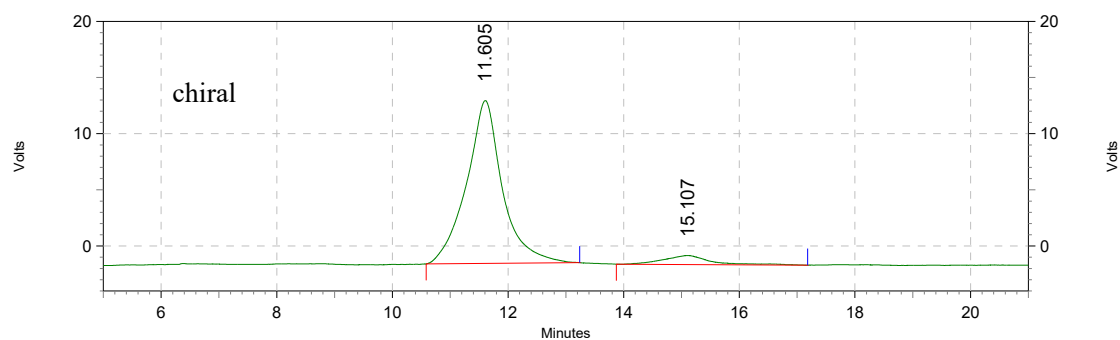

**UV1000-254nm**

**Results**

| Retention time | Area   | Area%   | Height | Height% |
|----------------|--------|---------|--------|---------|
| 11.605         | 624930 | 93.164  | 14498  | 94.740  |
| 15.107         | 45854  | 6.836   | 805    | 5.260   |
| Totals         | 670784 | 100.000 | 15303  | 100.000 |

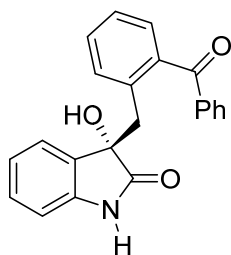

**3b**

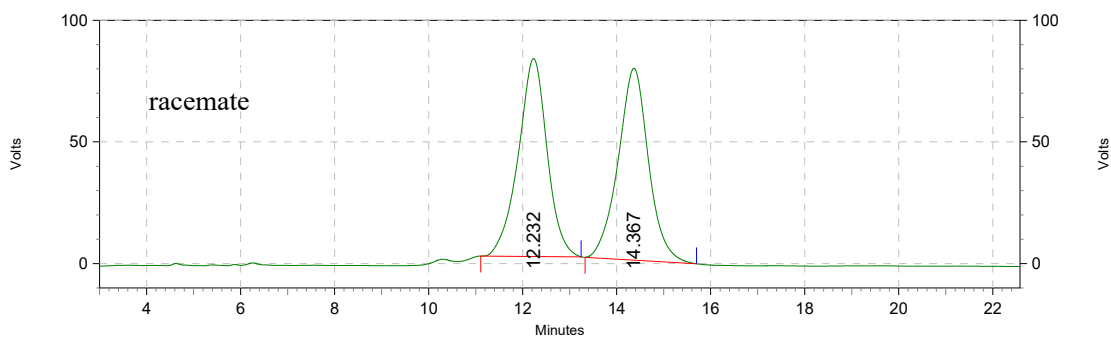

**UV1000-254nm**

**Results**

| Retention time | Area    | Area%   | Height | Height% |
|----------------|---------|---------|--------|---------|
| 12.232         | 3478882 | 49.563  | 81338  | 50.779  |
| 14.367         | 3540268 | 50.437  | 78841  | 49.221  |
| Totals         | 7019150 | 100.000 | 160179 | 100.000 |

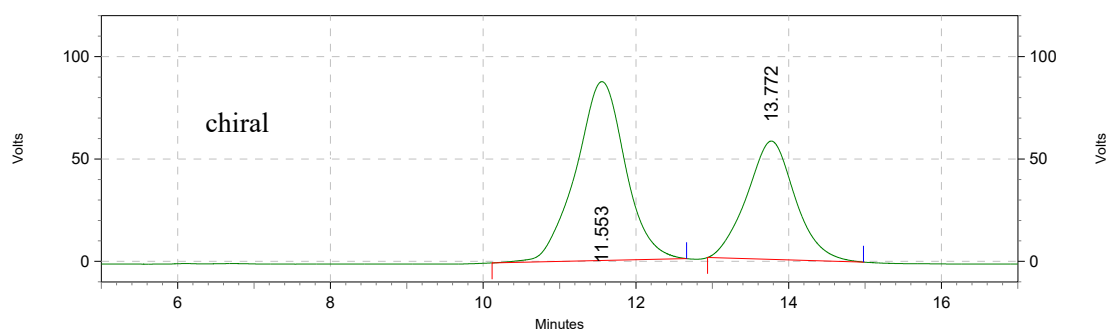

**UV1000-254nm**

**Results**

| Retention time | Area    | Area%   | Height | Height% |
|----------------|---------|---------|--------|---------|
| 11.553         | 3913892 | 60.655  | 87332  | 60.187  |
| 13.772         | 2538857 | 39.345  | 57770  | 39.813  |
| Totals         | 6452749 | 100.000 | 145102 | 100.000 |

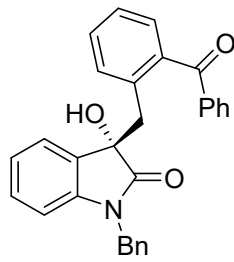

**3c**

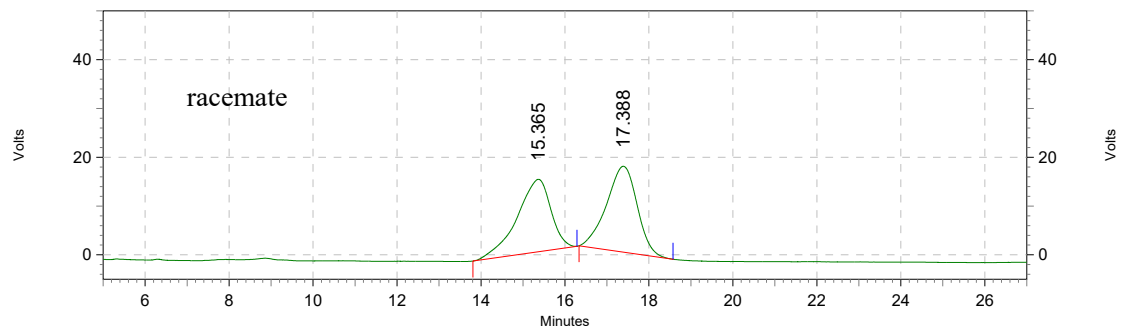

**UV1000-254nm**

**Results**

| Retention time | Area    | Area%   | Height | Height% |
|----------------|---------|---------|--------|---------|
| 15.365         | 835001  | 48.351  | 14847  | 45.783  |
| 17.388         | 891960  | 51.649  | 17582  | 54.217  |
| Totals         | 1726961 | 100.000 | 32429  | 100.000 |

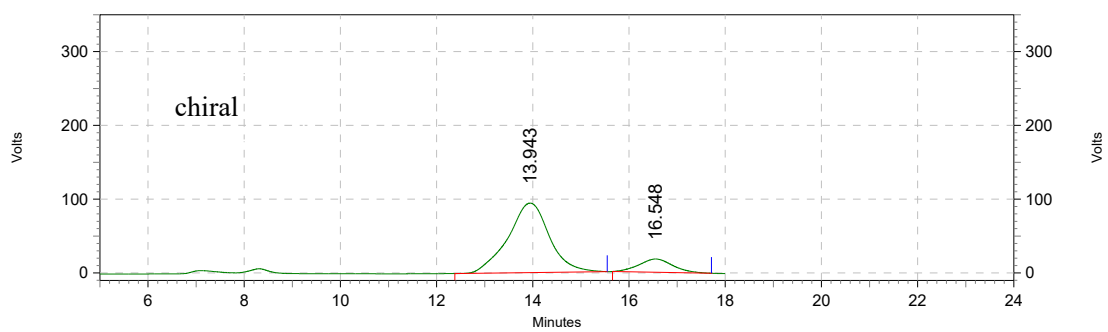

**UV1000-254nm**

**Results**

| Retention time | Area    | Area%   | Height | Height% |
|----------------|---------|---------|--------|---------|
| 13.943         | 5624287 | 86.516  | 94138  | 84.000  |
| 16.548         | 876577  | 13.484  | 17931  | 16.000  |
| Totals         | 6500864 | 100.000 | 112069 | 100.000 |

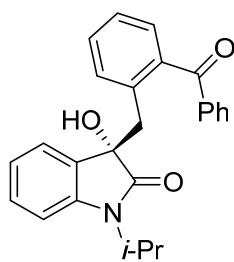

**3d**

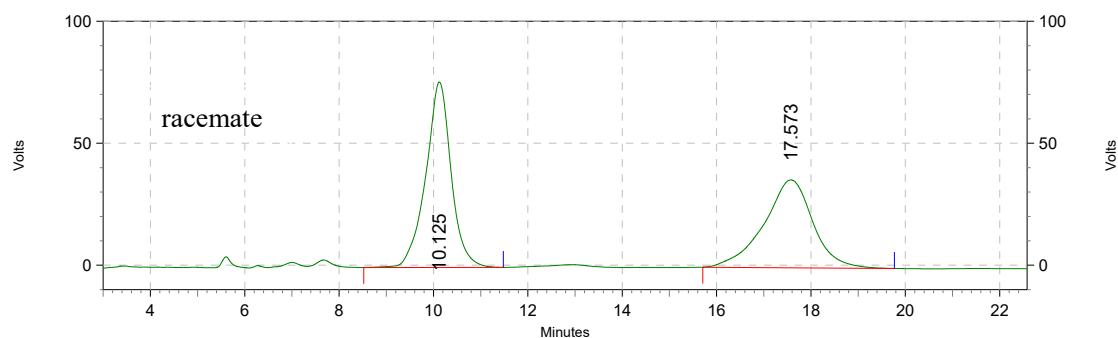

**UV1000-254nm**

**Results**

| Retention time | Area    | Area%   | Height | Height% |
|----------------|---------|---------|--------|---------|
| 10.125         | 2846357 | 52.301  | 76010  | 67.855  |
| 17.573         | 2595944 | 47.699  | 36008  | 32.145  |
| Totals         | 5442301 | 100.000 | 112018 | 100.000 |

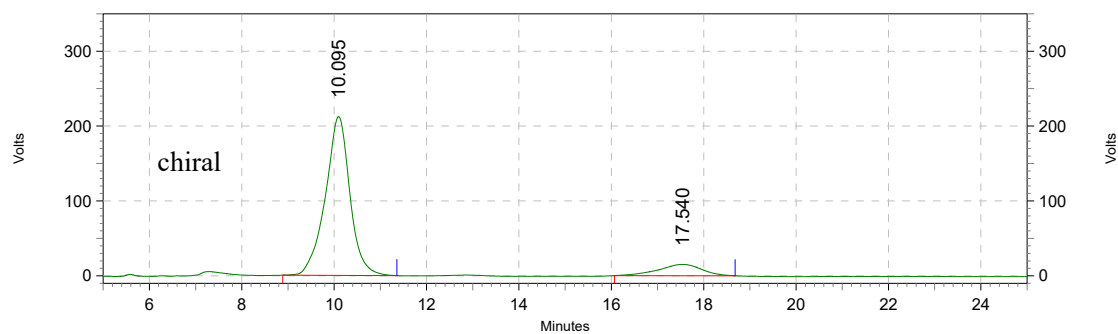

**UV1000-254nm**

**Results**

| Retention time | Area    | Area%   | Height | Height% |
|----------------|---------|---------|--------|---------|
| 10.095         | 7824474 | 88.836  | 212101 | 93.345  |
| 17.540         | 983311  | 11.164  | 15121  | 6.655   |
| Totals         | 8807785 | 100.000 | 227222 | 100.000 |

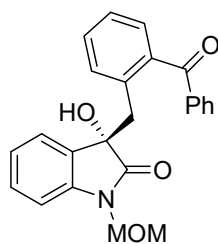

**3e**

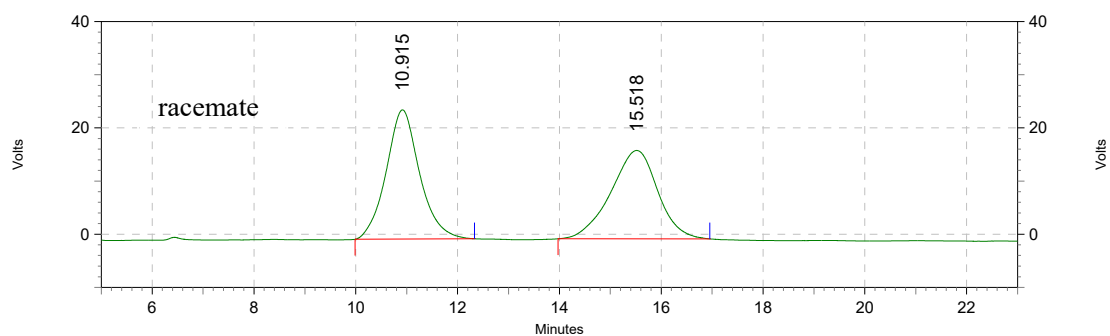

**UV1000-254nm**

**Results**

| Retention time | Area    | Area%   | Height | Height% |
|----------------|---------|---------|--------|---------|
| 10.915         | 1109496 | 50.985  | 24302  | 59.385  |
| 15.518         | 1066629 | 49.015  | 16621  | 40.615  |
| Totals         | 2176125 | 100.000 | 40923  | 100.000 |

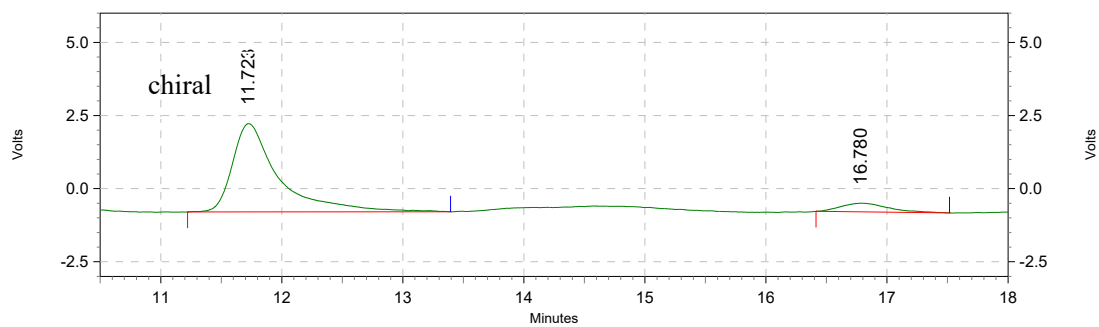

**UV1000-254nm**

**Results**

| Retention time | Area  | Area%   | Height | Height% |
|----------------|-------|---------|--------|---------|
| 11.723         | 80063 | 92.892  | 3014   | 91.030  |
| 16.780         | 8023  | 7.108   | 297    | 8.970   |
| Totals         | 88086 | 100.000 | 3311   | 100.000 |

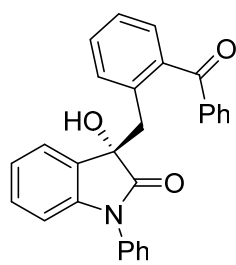

**3f**

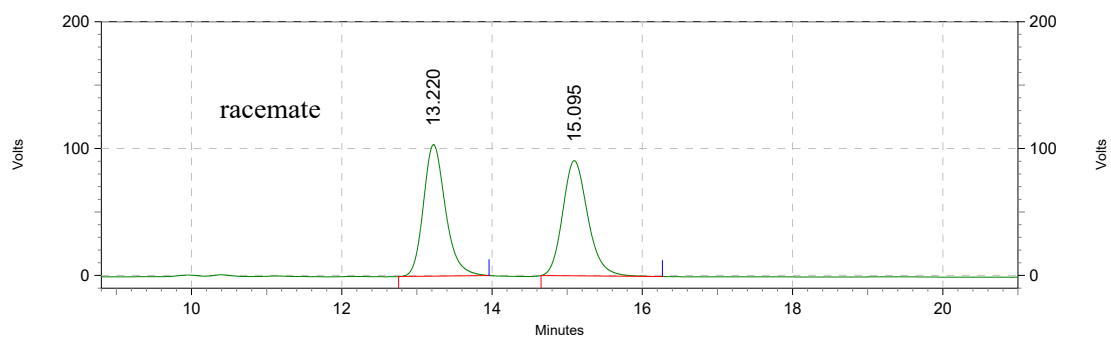

**UV1000-254nm**

**Results**

| Retention time | Area    | Area%   | Height | Height% |
|----------------|---------|---------|--------|---------|
| 13.220         | 2116708 | 50.054  | 103732 | 53.319  |
| 15.095         | 2112153 | 49.946  | 90819  | 46.681  |
| Totals         | 4228861 | 100.000 | 194551 | 100.000 |

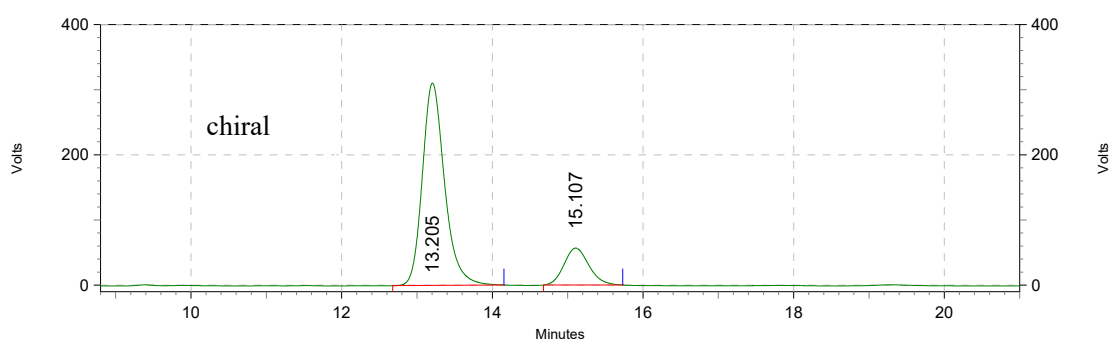

**UV1000-254nm**

**Results**

| Retention time | Area    | Area%   | Height | Height% |
|----------------|---------|---------|--------|---------|
| 13.205         | 6371168 | 83.052  | 310710 | 84.560  |
| 15.107         | 1300123 | 16.948  | 56735  | 15.440  |
| Totals         | 7671291 | 100.000 | 367445 | 100.000 |

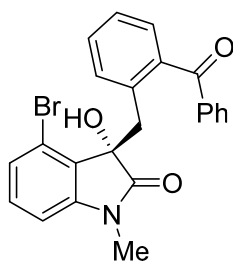

**3g**

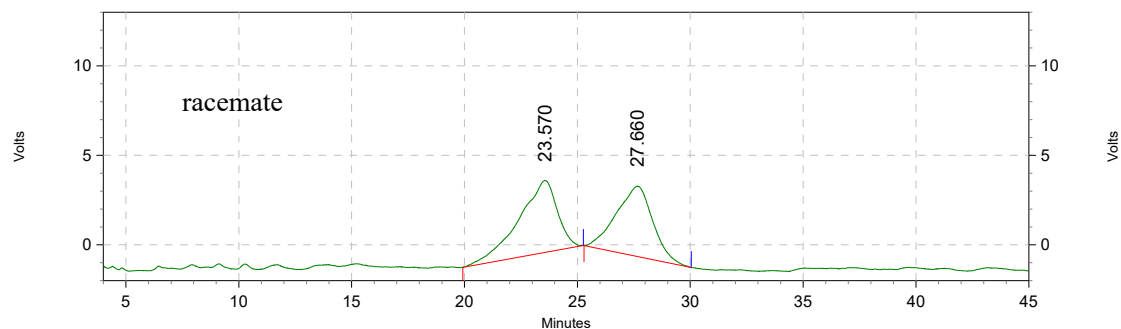

**UV1000-254nm**

**Results**

| Retention time | Area   | Area%   | Height | Height% |
|----------------|--------|---------|--------|---------|
| 23.570         | 481398 | 50.198  | 4017   | 50.541  |
| 27.660         | 440848 | 49.802  | 3931   | 49.459  |
| Totals         | 922246 | 100.000 | 7948   | 100.000 |

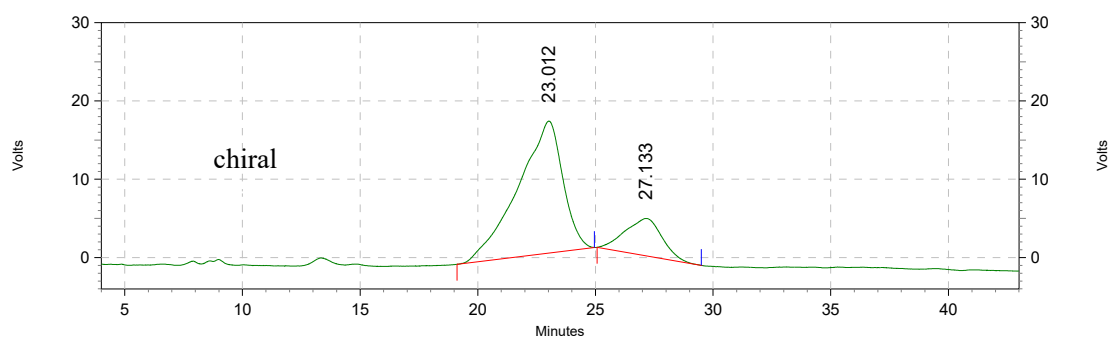

**UV1000-254nm**

**Results**

| Retention time | Area    | Area%   | Height | Height% |
|----------------|---------|---------|--------|---------|
| 23.012         | 2240764 | 81.162  | 16854  | 77.948  |
| 27.133         | 520089  | 18.838  | 4768   | 22.052  |
| Totals         | 2760853 | 100.000 | 21622  | 100.000 |



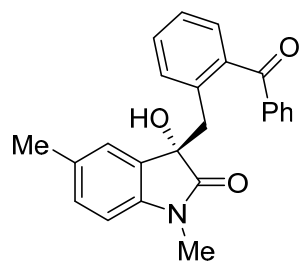

**3h**

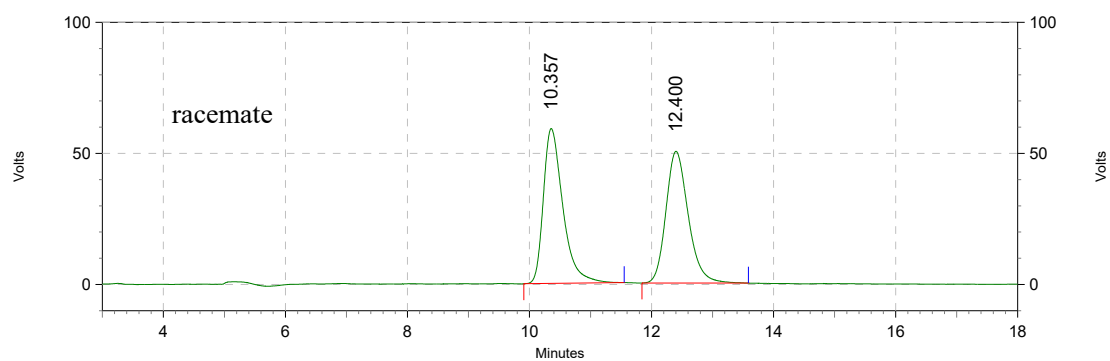

**UV1000-254nm**

**Results**

| Retention time | Area    | Area%   | Height | Height% |
|----------------|---------|---------|--------|---------|
| 10.357         | 1311490 | 50.706  | 59075  | 54.033  |
| 12.400         | 1274969 | 49.294  | 50257  | 45.967  |
| Totals         | 2586459 | 100.000 | 109332 | 100.000 |

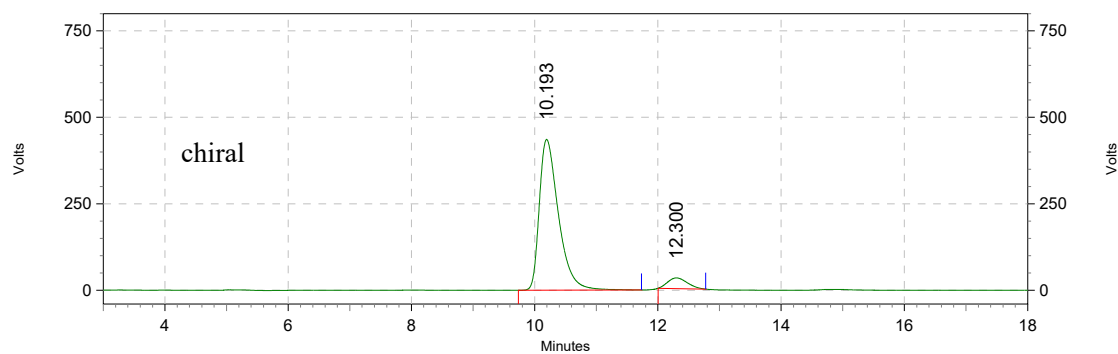

**UV1000-254nm**

**Results**

| Retention time | Area     | Area%   | Height | Height% |
|----------------|----------|---------|--------|---------|
| 10.193         | 12508331 | 94.800  | 436148 | 93.385  |
| 12.300         | 686111   | 5.200   | 30894  | 6.615   |
| Totals         | 13194442 | 100.000 | 467042 | 100.000 |

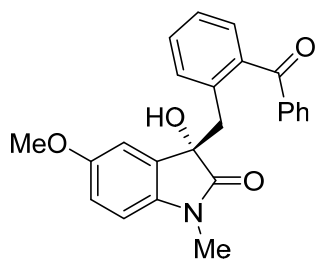

**3i**

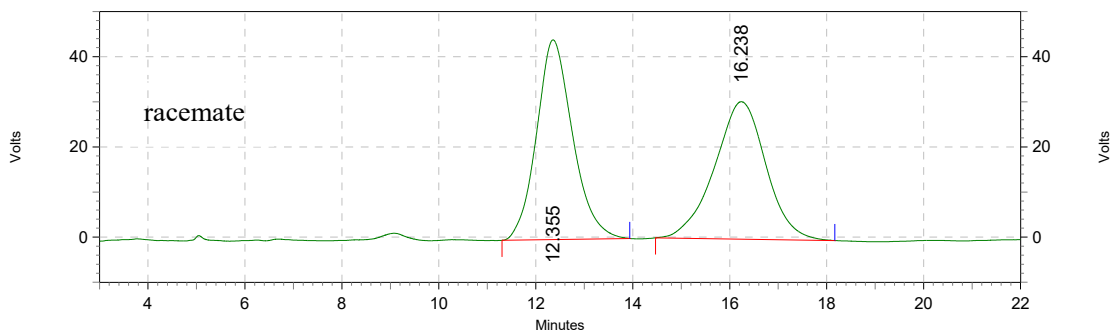

**UV1000-254nm**

**Results**

| Retention time | Area    | Area%   | Height | Height% |
|----------------|---------|---------|--------|---------|
| 12.355         | 2289632 | 50.472  | 44256  | 59.232  |
| 16.238         | 2246833 | 49.528  | 30460  | 40.768  |
| Totals         | 4536465 | 100.000 | 74716  | 100.000 |

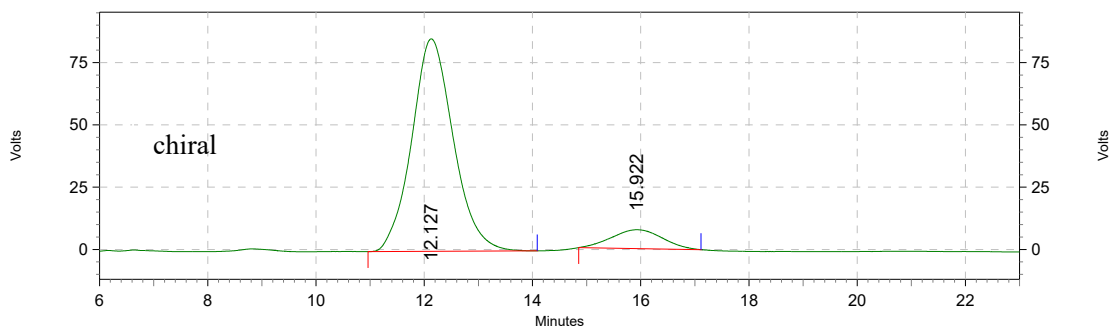

**UV1000-254nm**

**Results**

| Retention time | Area    | Area%   | Height | Height% |
|----------------|---------|---------|--------|---------|
| 12.127         | 4554744 | 92.743  | 85272  | 91.858  |
| 15.922         | 492464  | 7.257   | 7558   | 8.142   |
| Totals         | 5047208 | 100.000 | 92830  | 100.000 |

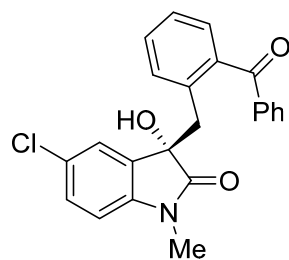

**3j**

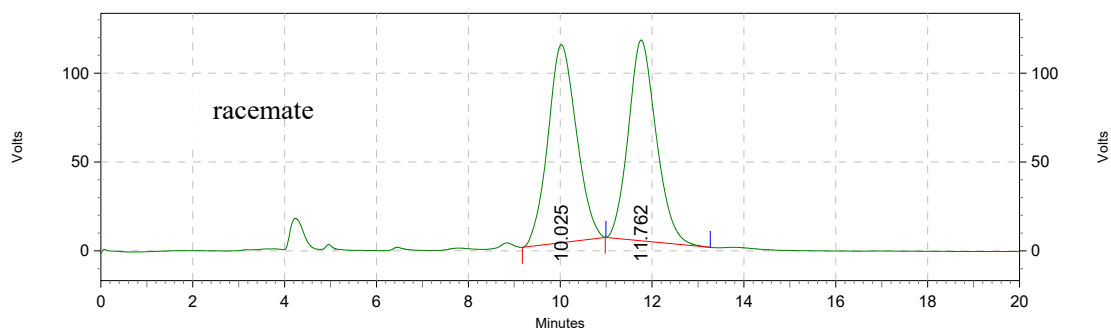

**UV1000-254nm**

**Results**

| Retention time | Area    | Area%   | Height | Height% |
|----------------|---------|---------|--------|---------|
| 10.025         | 4802543 | 50.212  | 111395 | 49.663  |
| 11.762         | 4761983 | 49.788  | 112909 | 50.337  |
| Totals         | 9564526 | 100.000 | 224304 | 100.000 |

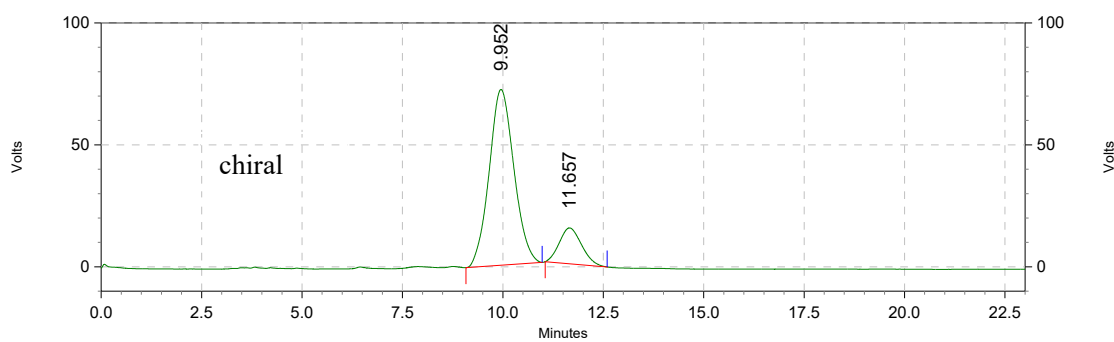

**UV1000-254nm**

**Results**

| Retention time | Area    | Area%   | Height | Height% |
|----------------|---------|---------|--------|---------|
| 9.952          | 3093973 | 84.494  | 72078  | 83.061  |
| 11.657         | 567811  | 15.506  | 14699  | 16.939  |
| Totals         | 3661784 | 100.000 | 86777  | 100.000 |

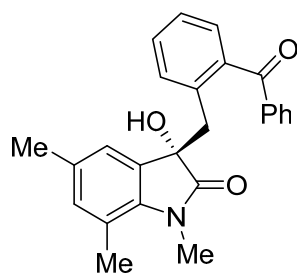

**3k**

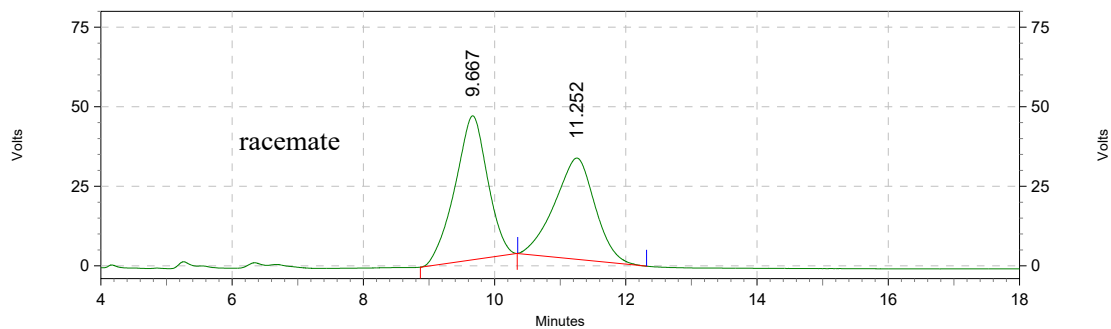

**UV1000-254nm**

**Results**

| Retention time | Area    | Area%   | Height | Height% |
|----------------|---------|---------|--------|---------|
| 9.667          | 1557386 | 50.361  | 45257  | 58.701  |
| 11.252         | 1535058 | 49.639  | 31840  | 41.299  |
| Totals         | 3092444 | 100.000 | 77097  | 100.000 |

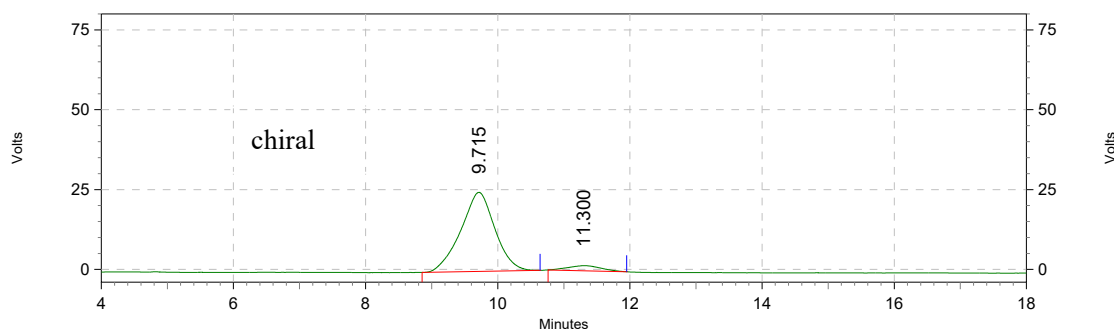

**UV1000-254nm**

**Results**

| Retention time | Area   | Area%   | Height | Height% |
|----------------|--------|---------|--------|---------|
| 9.715          | 889670 | 96.153  | 24760  | 93.973  |
| 11.300         | 35595  | 3.847   | 1588   | 6.027   |
| Totals         | 925265 | 100.000 | 26348  | 100.000 |

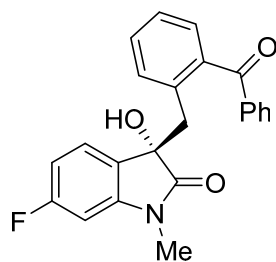

**3I**

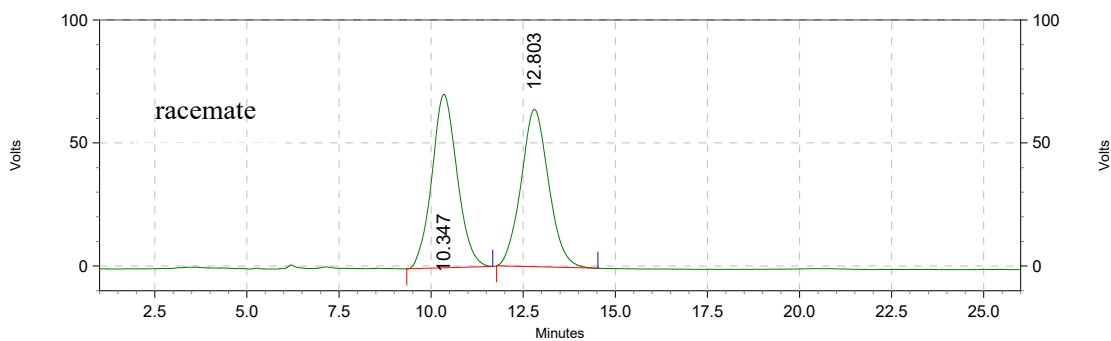

**UV1000-254nm**

**Results**

| Retention time | Area    | Area%   | Height | Height% |
|----------------|---------|---------|--------|---------|
| 10.347         | 3363518 | 50.287  | 70440  | 52.422  |
| 12.803         | 3325166 | 49.713  | 63932  | 47.578  |
| Totals         | 6688684 | 100.000 | 134372 | 100.000 |

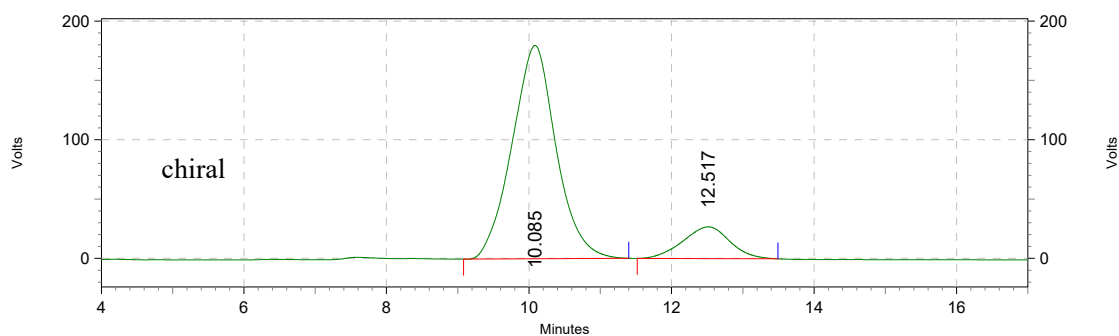

**UV1000-254nm**

**Results**

| Retention time | Area    | Area%   | Height | Height% |
|----------------|---------|---------|--------|---------|
| 10.085         | 7743223 | 87.302  | 179735 | 87.037  |
| 12.517         | 1229051 | 12.698  | 26770  | 12.963  |
| Totals         | 8972274 | 100.000 | 206505 | 100.000 |

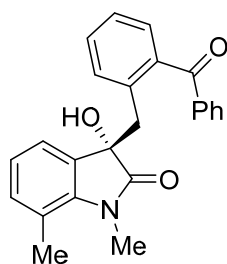

**3m**

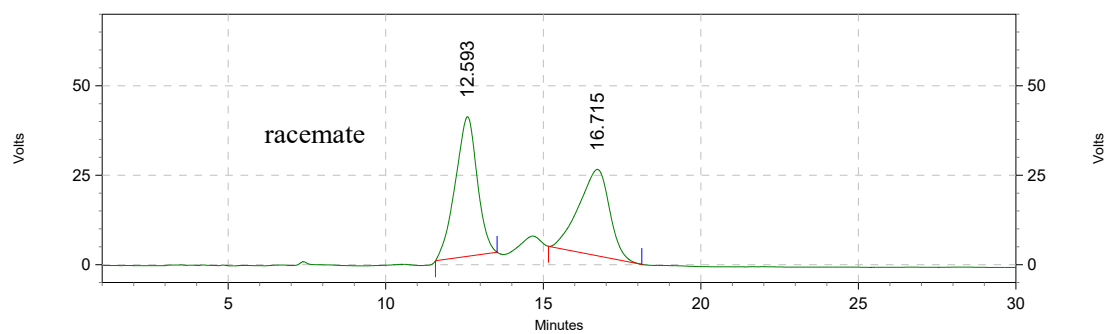

**UV1000-254nm**

**Results**

| Retention time | Area    | Area%   | Height | Height% |
|----------------|---------|---------|--------|---------|
| 12.593         | 1891611 | 53.651  | 39036  | 61.777  |
| 16.715         | 1634150 | 46.349  | 24153  | 38.223  |
| Totals         | 3525761 | 100.000 | 63189  | 100.000 |

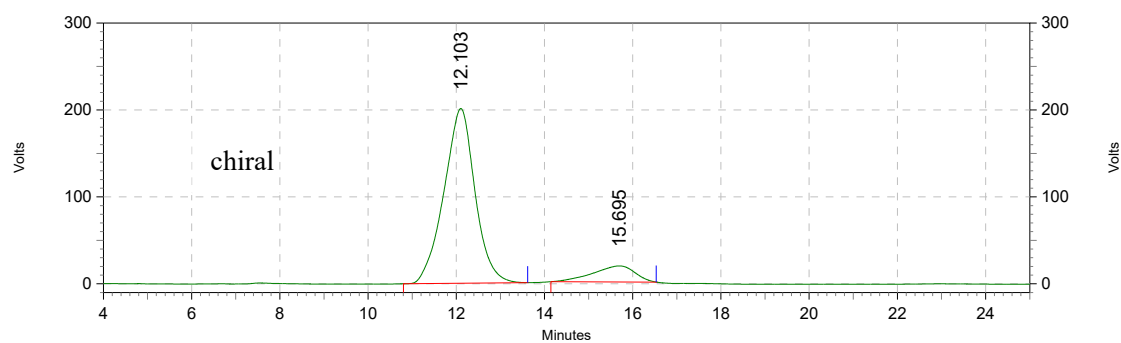

**UV1000-254nm**

**Results**

| Retention time | Area     | Area%   | Height | Height% |
|----------------|----------|---------|--------|---------|
| 12.103         | 15010420 | 92.910  | 200990 | 91.596  |
| 15.695         | 1215307  | 7.090   | 18442  | 8.404   |
| Totals         | 16225727 | 100.000 | 219432 | 100.000 |

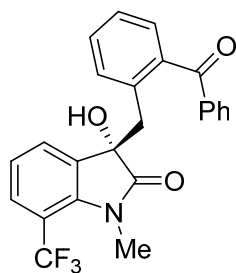

**3n**

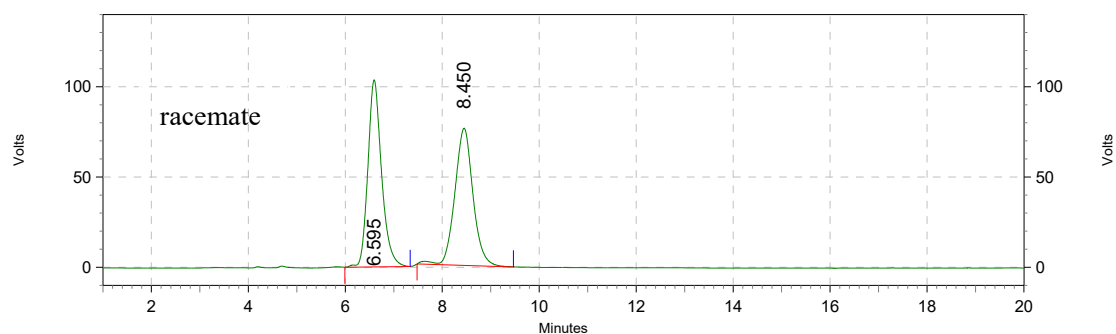

**UV1000-254nm**

**Results**

| Retention time | Area    | Area%   | Height | Height% |
|----------------|---------|---------|--------|---------|
| 6.595          | 2030295 | 50.656  | 103559 | 57.697  |
| 8.450          | 1977749 | 49.344  | 75929  | 42.303  |
| Totals         | 4008044 | 100.000 | 179488 | 100.000 |

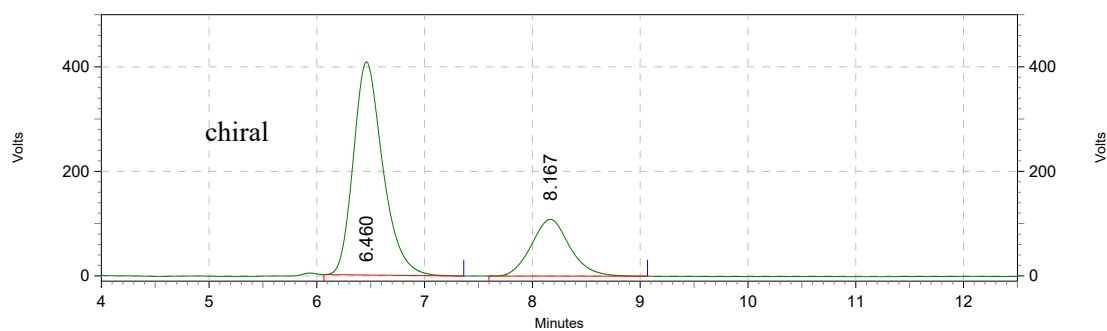

**UV1000-254nm**

**Results**

| Retention time | Area     | Area%   | Height | Height% |
|----------------|----------|---------|--------|---------|
| 6.460          | 7750194  | 75.132  | 407969 | 78.958  |
| 8.167          | 2704346  | 24.868  | 108723 | 21.042  |
| Totals         | 10454540 | 100.000 | 516692 | 100.000 |

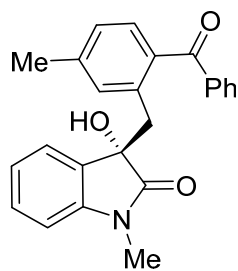

**30**

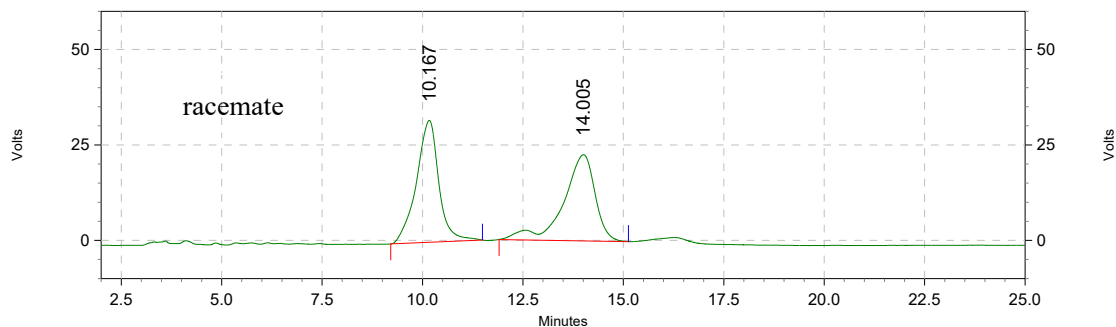

**UV1000-254nm**

**Results**

| Retention time | Area    | Area%   | Height | Height% |
|----------------|---------|---------|--------|---------|
| 10.167         | 1236643 | 50.048  | 31933  | 58.602  |
| 14.005         | 1234248 | 49.952  | 22558  | 41.398  |
| Totals         | 2470891 | 100.000 | 54491  | 100.000 |

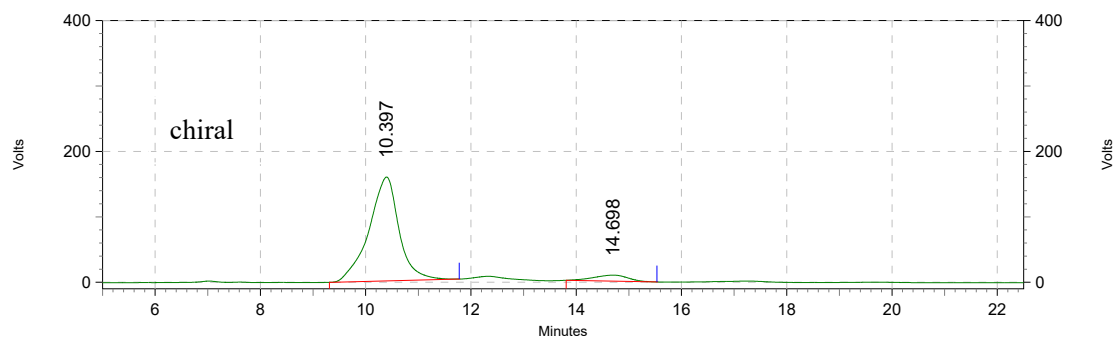

**UV1000-254nm**

**Results**

| Retention time | Area    | Area%   | Height | Height% |
|----------------|---------|---------|--------|---------|
| 10.397         | 6885792 | 95.355  | 160258 | 94.572  |
| 14.698         | 411981  | 4.645   | 9198   | 5.428   |
| Totals         | 7297773 | 100.000 | 169456 | 100.000 |



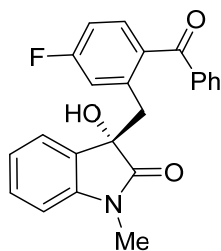

**3p**

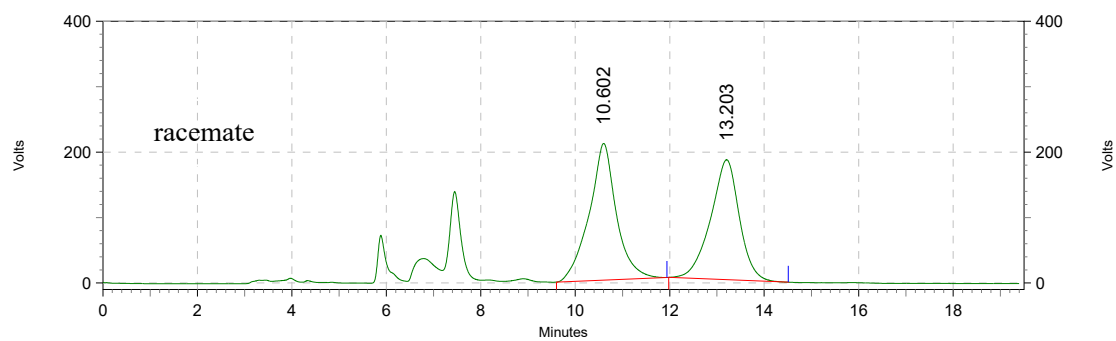

**UV1000-254nm**

**Results**

| Retention time | Area     | Area%   | Height | Height% |
|----------------|----------|---------|--------|---------|
| 10.602         | 8337152  | 51.863  | 208848 | 53.246  |
| 13.203         | 7738133  | 48.137  | 183382 | 46.754  |
| Totals         | 16075285 | 100.000 | 392230 | 100.000 |

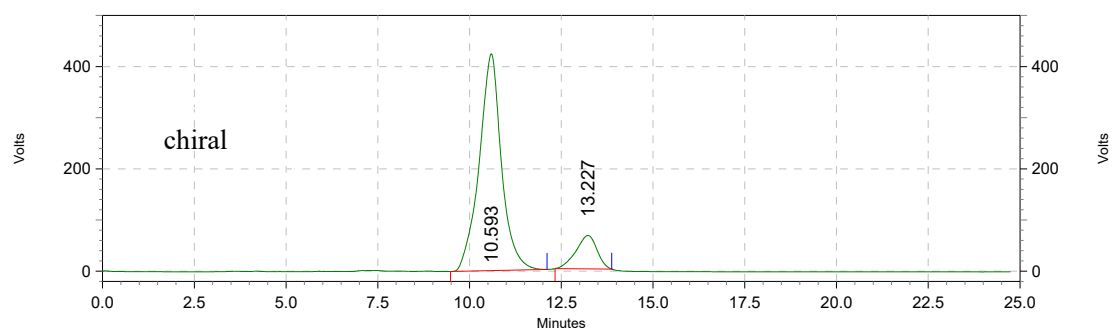

**UV1000-254nm**

**Results**

| Retention time | Area     | Area%   | Height | Height% |
|----------------|----------|---------|--------|---------|
| 10.593         | 17866467 | 87.427  | 423847 | 86.630  |
| 13.227         | 2616308  | 12.573  | 65414  | 13.370  |
| Totals         | 20482775 | 100.000 | 489261 | 100.000 |

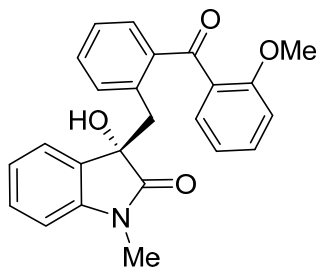

**3q**

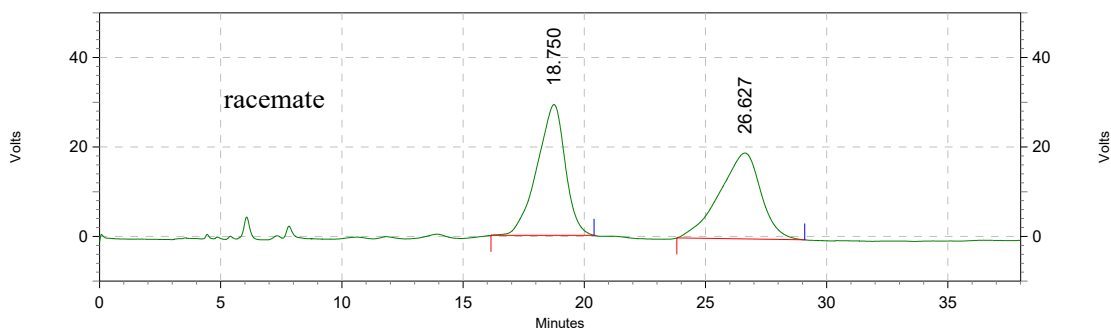

**UV1000-254nm**

**Results**

| Retention time | Area    | Area%   | Height | Height% |
|----------------|---------|---------|--------|---------|
| 18.750         | 2366396 | 50.853  | 29257  | 60.349  |
| 26.627         | 2286969 | 49.147  | 19223  | 39.651  |
| Totals         | 4653365 | 100.000 | 48480  | 100.000 |

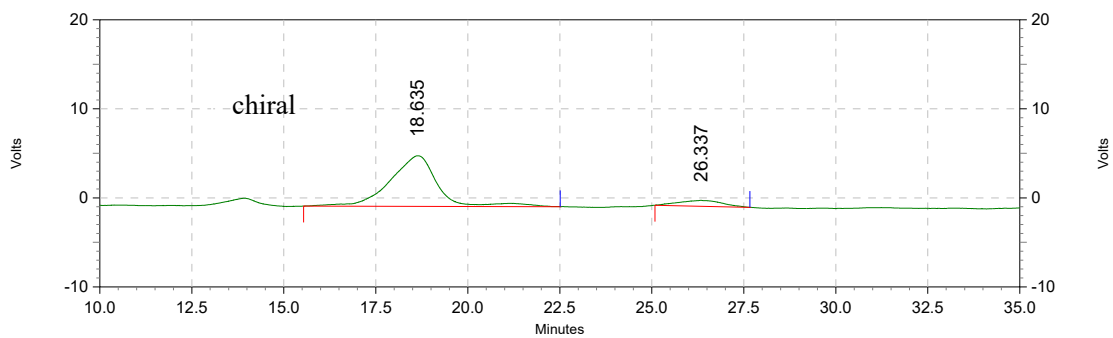

**UV1000-254nm**

**Results**

| Retention time | Area   | Area%   | Height | Height% |
|----------------|--------|---------|--------|---------|
| 18.635         | 758989 | 93.423  | 5685   | 89.485  |
| 26.337         | 53433  | 6.577   | 668    | 10.515  |
| Totals         | 563823 | 100.000 | 6353   | 100.000 |

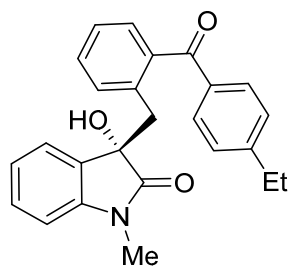

**3r**

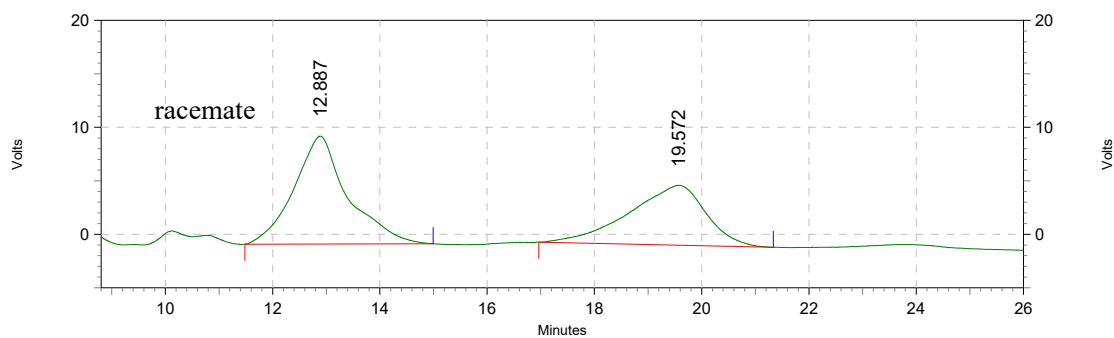

**UV1000-254nm**

**Results**

| Retention time | Area    | Area%   | Height | Height% |
|----------------|---------|---------|--------|---------|
| 12.887         | 702389  | 51.824  | 10088  | 64.288  |
| 19.572         | 652946  | 48.176  | 5604   | 35.712  |
| Totals         | 1355335 | 100.000 | 15692  | 100.000 |

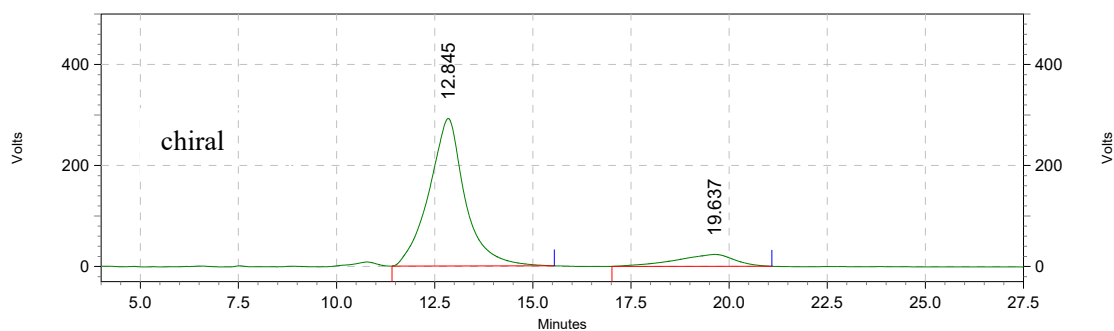

**UV1000-254nm**

**Results**

| Retention time | Area     | Area%   | Height | Height% |
|----------------|----------|---------|--------|---------|
| 12.845         | 18548420 | 89.760  | 292276 | 92.580  |
| 19.637         | 2138312  | 10.240  | 23426  | 7.420   |
| Totals         | 20686732 | 100.000 | 315702 | 100.000 |

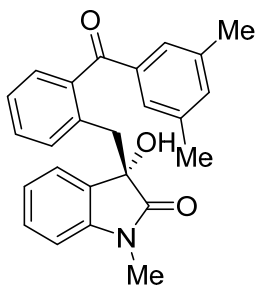

**3s**

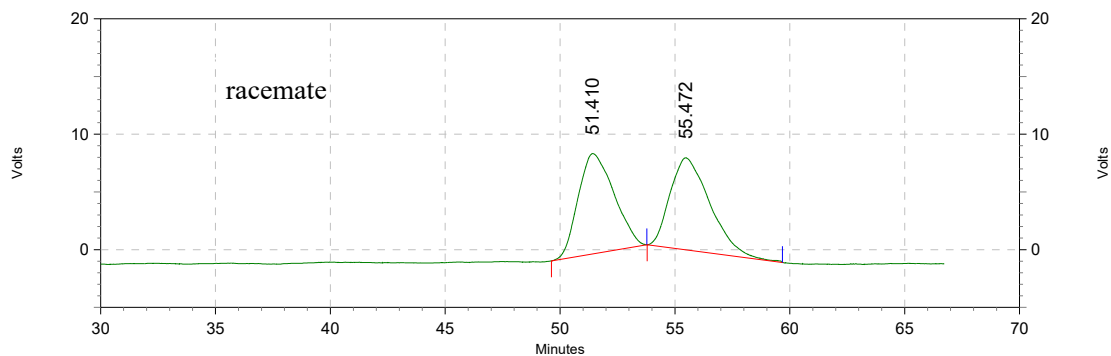

**UV1000-254nm**

**Results**

| Retention time | Area    | Area%   | Height | Height% |
|----------------|---------|---------|--------|---------|
| 51.410         | 940146  | 49.265  | 8696   | 52.153  |
| 55.472         | 968215  | 50.735  | 7978   | 47.847  |
| Totals         | 1908361 | 100.000 | 16674  | 100.000 |

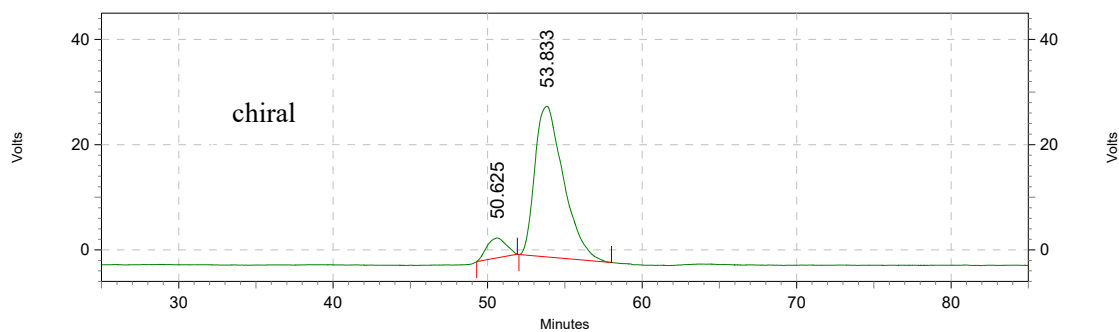

**UV1000-254nm**

**Results**

| Retention time | Area    | Area%   | Height | Height% |
|----------------|---------|---------|--------|---------|
| 50.625         | 330517  | 7.203   | 3772   | 11.641  |
| 53.833         | 3698573 | 92.797  | 28630  | 88.359  |
| Totals         | 4029090 | 100.000 | 32402  | 100.000 |

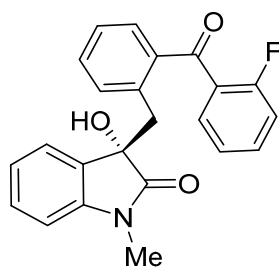

**3t**

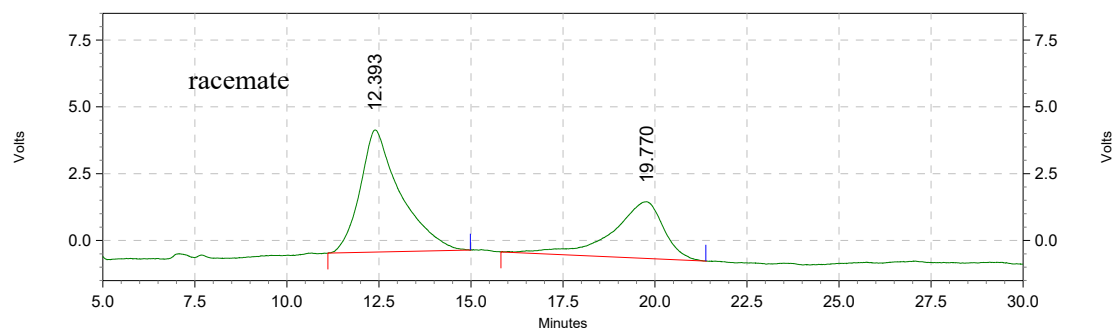

**UV1000-254nm**

**Results**

| Retention time | Area   | Area%   | Height | Height% |
|----------------|--------|---------|--------|---------|
| 12.393         | 347220 | 52.715  | 4570   | 68.280  |
| 19.770         | 311454 | 47.285  | 2123   | 31.720  |
| Totals         | 658674 | 100.000 | 6693   | 100.000 |

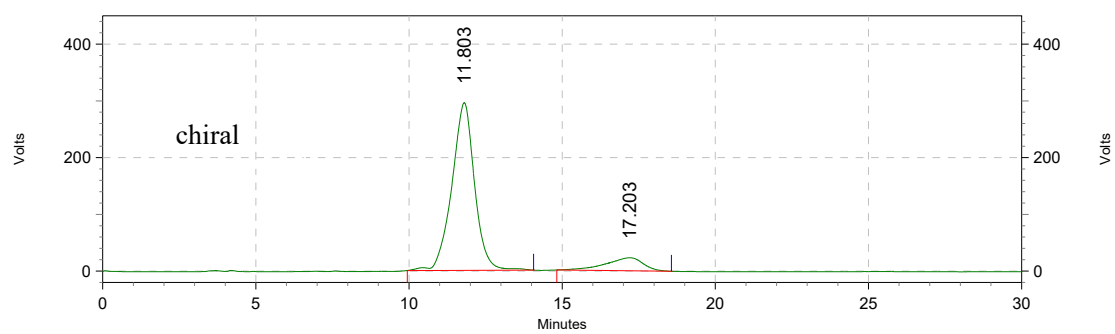

**UV1000-254nm**

**Results**

| Retention time | Area     | Area%   | Height | Height% |
|----------------|----------|---------|--------|---------|
| 11.803         | 15247819 | 89.637  | 295304 | 92.781  |
| 17.203         | 1954738  | 10.363  | 22977  | 7.219   |
| Totals         | 17202557 | 100.000 | 318281 | 100.000 |

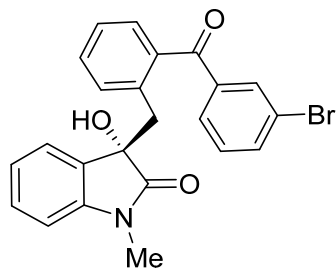

**3u**

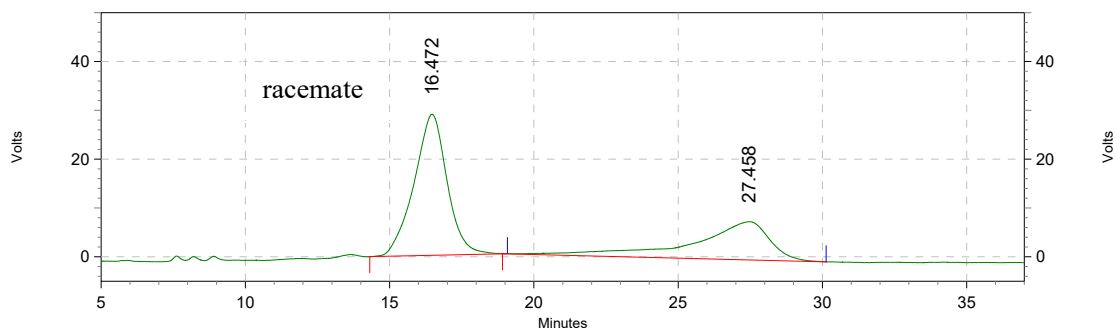

**UV1000-254nm**

**Results**

| Retention time | Area    | Area%   | Height | Height% |
|----------------|---------|---------|--------|---------|
| 16.472         | 2300410 | 51.529  | 28901  | 78.700  |
| 27.458         | 2163891 | 48.471  | 7822   | 21.300  |
| Totals         | 4464301 | 100.000 | 36723  | 100.000 |

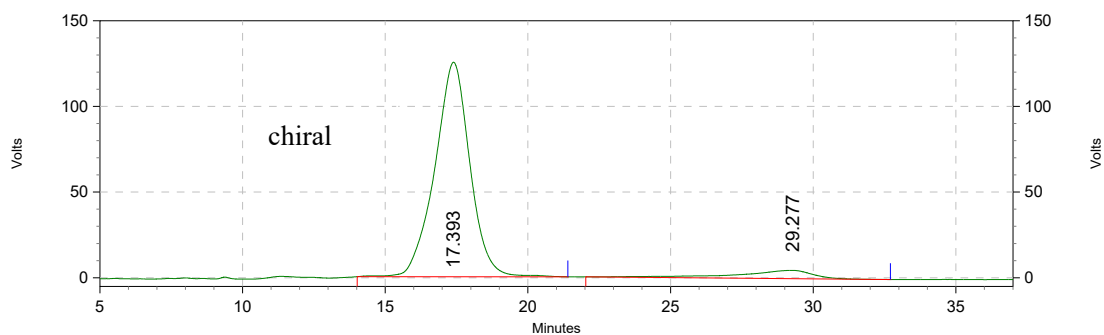

**UV1000-254nm**

**Results**

| Retention time | Area     | Area%   | Height | Height% |
|----------------|----------|---------|--------|---------|
| 17.393         | 10703041 | 92.332  | 125140 | 96.263  |
| 29.277         | 888810   | 7.668   | 4858   | 3.737   |
| Totals         | 11591851 | 100.000 | 129998 | 100.000 |

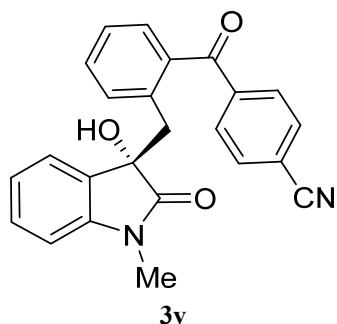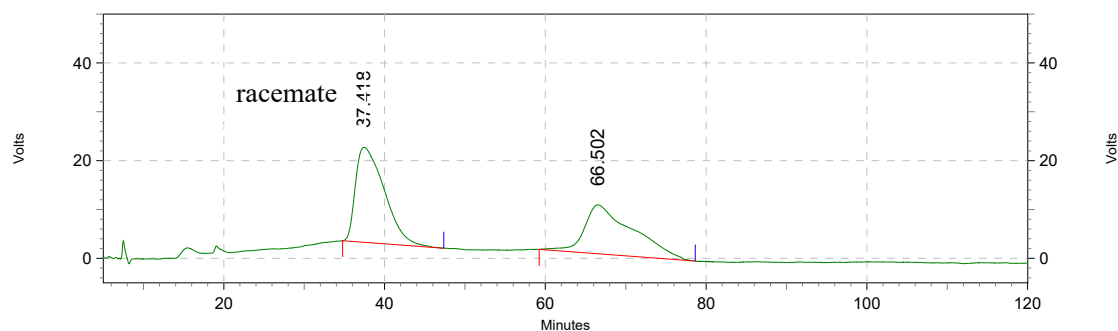

**UV1000-254nm**

**Results**

| Retention time | Area    | Area%   | Height | Height% |
|----------------|---------|---------|--------|---------|
| 37.418         | 4852518 | 51.837  | 19434  | 66.014  |
| 66.502         | 4508590 | 48.163  | 10005  | 33.986  |
| Totals         | 9361108 | 100.000 | 29439  | 100.000 |

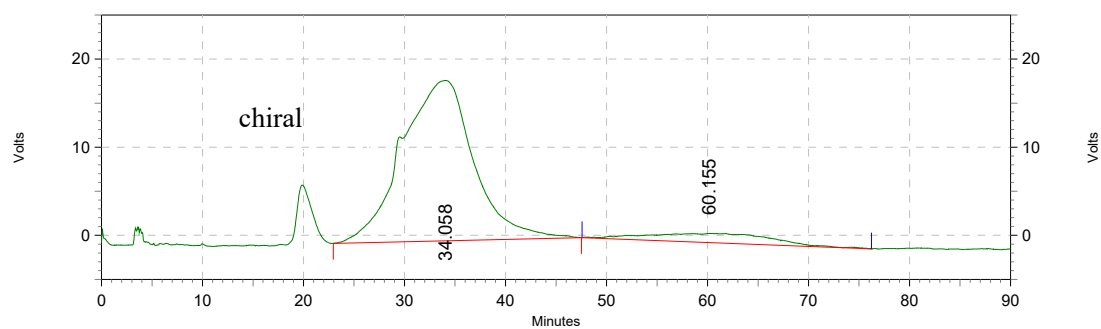

**UV1000-254nm**

**Results**

| Retention time | Area    | Area%   | Height | Height% |
|----------------|---------|---------|--------|---------|
| 34.058         | 9013161 | 90.889  | 18201  | 94.610  |
| 60.155         | 903555  | 9.111   | 1037   | 5.390   |
| Totals         | 9916716 | 100.000 | 19238  | 100.000 |

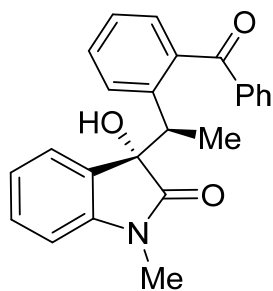

**3w**

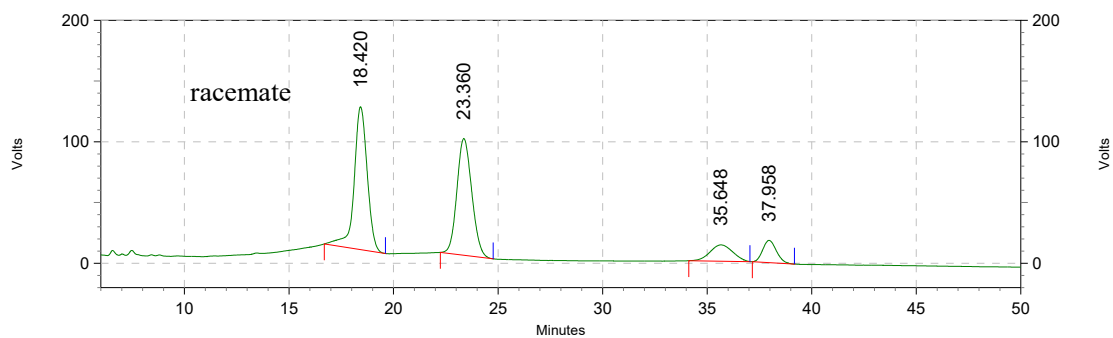

**UV1000-254nm**

**Results**

| Retention time | Area            | Area%          | Height        | Height%        |
|----------------|-----------------|----------------|---------------|----------------|
| 18.420         | 5143432         | 43.810         | 117607        | 47.912         |
| 23.360         | 4752716         | 40.482         | 96101         | 39.151         |
| 35.648         | 1011563         | 8.116          | 13405         | 5.461          |
| 37.958         | 832644          | 7.592          | 18350         | 7.476          |
| <b>Totals</b>  | <b>11740355</b> | <b>100.000</b> | <b>245463</b> | <b>100.000</b> |

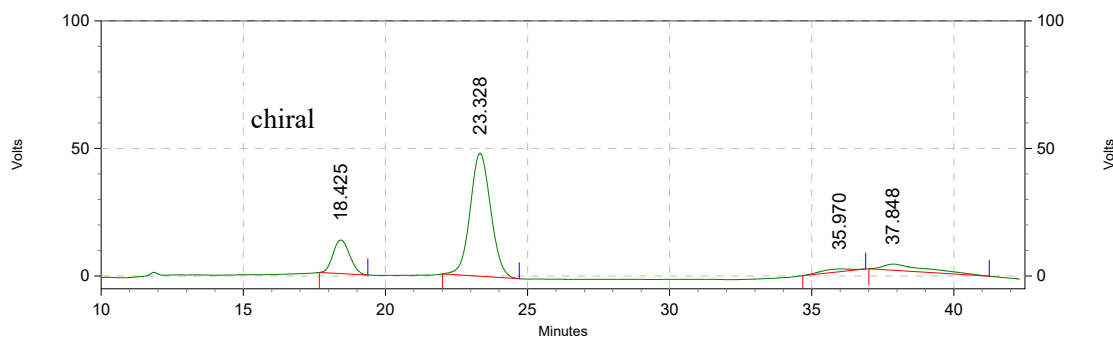

**UV1000-254nm**

**Results**

| Retention time | Area           | Area%          | Height       | Height%        |
|----------------|----------------|----------------|--------------|----------------|
| 18.425         | 538224         | 16.127         | 13166        | 20.293         |
| 23.328         | 2429304        | 72.791         | 48191        | 74.276         |
| 35.970         | 84790          | 2.541          | 1099         | 1.694          |
| 37.848         | 285069         | 8.541          | 2425         | 3.738          |
| <b>Totals</b>  | <b>3337387</b> | <b>100.000</b> | <b>64881</b> | <b>100.000</b> |



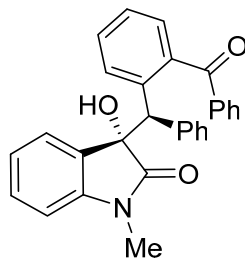

**3x**

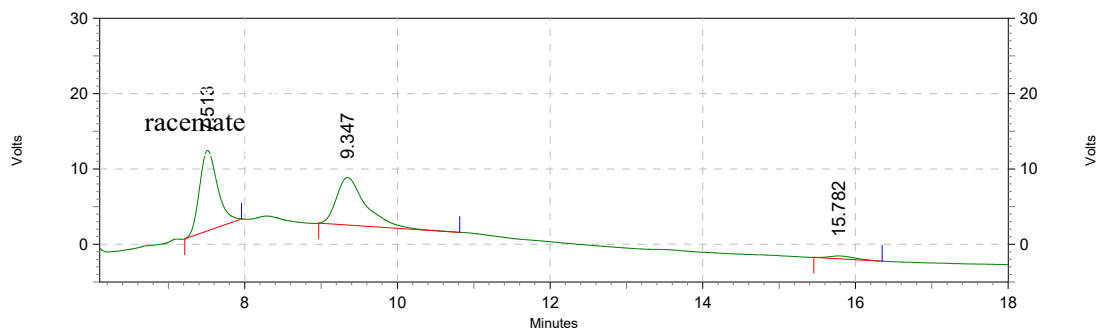

**UV1000-254nm**

**Results**

| Retention time | Area           | Area%          | Height       | Height%        |
|----------------|----------------|----------------|--------------|----------------|
| 7.483          | 829196         | 49.748         | 49955        | 61.700         |
| 9.312          | 807964         | 48.474         | 29625        | 36.590         |
| 15.742         | 29646          | 1.778          | 1385         | 1.711          |
| <b>Totals</b>  | <b>1666806</b> | <b>100.000</b> | <b>80965</b> | <b>100.000</b> |

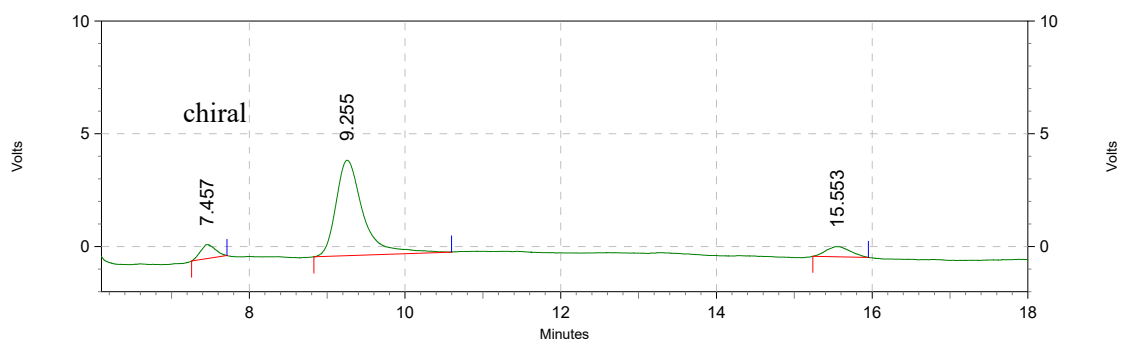

**UV1000-254nm**

**Results**

| Retention time | Area          | Area%          | Height      | Height%        |
|----------------|---------------|----------------|-------------|----------------|
| 7.457          | 6766          | 4.670          | 621         | 11.584         |
| 9.255          | 128368        | 88.602         | 4288        | 79.985         |
| 15.553         | 9748          | 6.728          | 452         | 8.431          |
| <b>Totals</b>  | <b>144882</b> | <b>100.000</b> | <b>5361</b> | <b>100.000</b> |

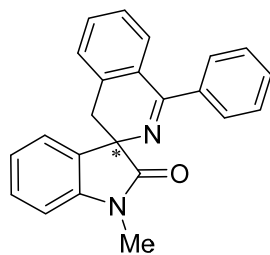

4

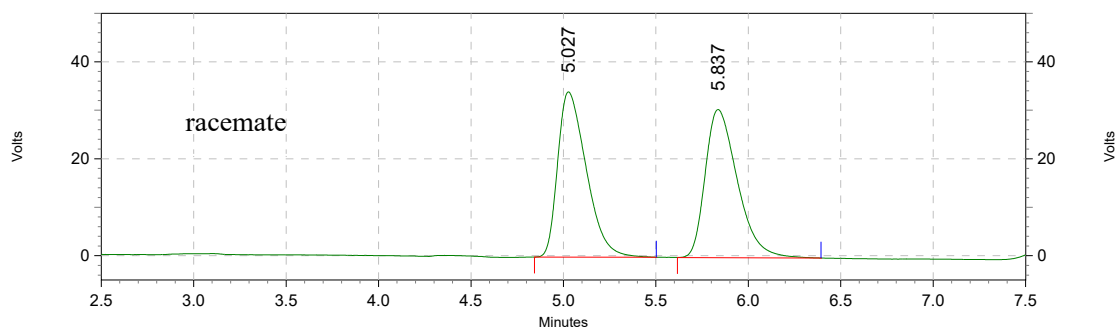

UV1000-254nm

Results

| Retention time | Area   | Area%   | Height | Height% |
|----------------|--------|---------|--------|---------|
| 5.027          | 366326 | 49.778  | 34067  | 52.726  |
| 5.837          | 369597 | 50.222  | 30544  | 47.274  |
| Totals         | 735923 | 100.000 | 64611  | 100.000 |

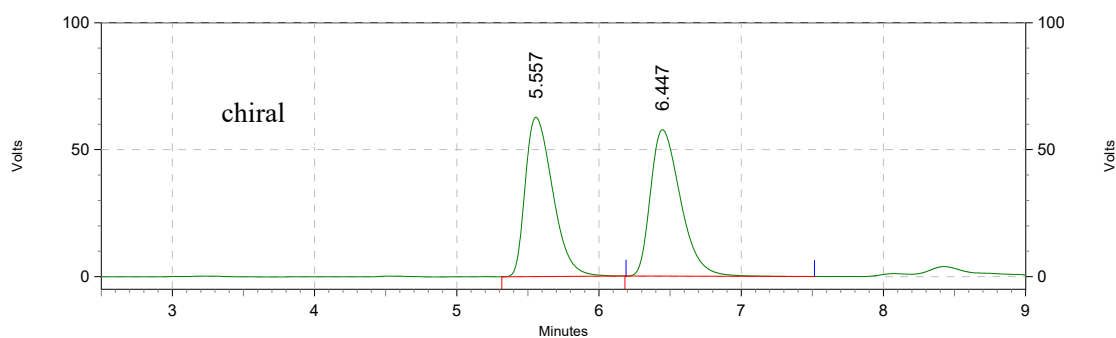

UV1000-254nm

Results

| Retention time | Area    | Area%   | Height | Height% |
|----------------|---------|---------|--------|---------|
| 5.557          | 911009  | 51.838  | 62730  | 52.100  |
| 6.447          | 846407  | 48.162  | 57673  | 47.900  |
| Totals         | 1687362 | 100.000 | 120403 | 100.000 |

## 7. References

- 1 For the preparation of isatins, please see: (a) S. E. Denmark and L. R. Cullen, Development of a phase-transfer-catalyzed, [2,3]-wittig rearrangement, *J. Org. Chem.*, 2015, **80**, 11818-11848; (b) D. J. Vyas, R. Fröhlich and M. Oestreich, Stereochemical surprises in the Lewis acid-mediated allylation of isatins, *J. Org. Chem.*, 2010, **75**, 6720-6723; (c) T. Itoh, H. Ishikawa and Y. Hayashi, Asymmetric aldol reaction of acetaldehyde and isatin derivatives for the total syntheses of ent-convolutamydine E and CPC-1 and a half fragment of madindoline A and B, *Org. Lett.*, 2009, **11**, 3854-3857.
- 2 For the preparation of benzophenones, please see: (a) L. Dell'Amico, A. Vega-Peñalosa and S. Cuadros, P. Melchiorre, Enantioselective organocatalytic Diels-Alder trapping of photochemically generated hydroxy-*o*-quinodimethanes, *Angew. Chem. Int. Ed.*, 2016, **55**, 3313; (b) Y. Kuninobu, T. Tatsuzaki, T. Matsuki and K. Takai, Indium-catalyzed construction of polycyclic aromatic hydrocarbon skeletons via dehydration, *J. Org. Chem.* 2011, **76** (17), 7005-7009.
- 3 C.-J. Wang, Z.-H. Zhang, X.-Q. Dong and X.-J. Wu, Chiral amine-thioureas bearing multiple hydrogen bonding donors: highly efficient organocatalysts for asymmetric Michael addition of acetylacetone to nitroolefins, *Chem. Commun.* 2008, **12**, 1431-1433.
- 4 B. Vakulya, S. Varga, A. Csámpai and T. Soós, Highly enantioselective conjugate addition of nitromethane to chalcones using bifunctional cinchona organocatalysts, *Org. Lett.*, 2005, **7**(10), 1967-1969.
- 5 (a) I. T. Raheem, P. S. Thiara, E. A. Peterson and E. N. Jacobsen. Enantioselective Pictet-Spengler-type cyclizations of hydroxylactams: H-bond donor catalysis by anion binding, *J. Am. Chem. Soc.* 2007, **129**, 13404-13405; (b) S. E. Reisman, A. G. Doyle and E. N. Jacobsen, Enantioselective thiourea-catalyzed additions to oxocarbenium ions, *J. Am. Chem. Soc.* 2008, **130** (23), 7198-7199; (c) S. J. Zuend and E. N. Jacobsen. Mechanism of amido-thiourea catalyzed enantioselective imine hydrocyanation: transition state stabilization via multiple non-covalent interactions, *J. Am. Chem. Soc.* 2009, **131**(42), 15358-15374; (d) Y. Park, K. C. Harper, N. Kuhl, E. E. Kwan, R. Y. Liu and E. N. Jacobsen, Macrocyclic bis-thioureas catalyze stereospecific glycosylation reactions, *Science*. 2017, **13**, 162-166; (e) E. Najda-Mocarska, A. Zakaszewska, K. Janikowska and S. Makowiec, New thiourea organocatalysts and their application for the synthesis of 5-(1H-indol-3-yl)methyl-2,2-dimethyl-1,3-dioxane-4,6-diones a source of chiral 3-indoymethyl ketenes, *Syn. Commun.* 2018, **48**, 14-25; (f) I.-Y. Lee, T. D. Gruber, A. Samuels, M. Yun, B. Nam, M. Kang, K. Crowley, B. Winterroth, H. I. Boshoff and C. E. Barry, Structure-activity relationships of antitubercular salicylanilides consistent with disruption of the proton gradient via proton shuttling, *Bioorg. Med. Chem.* 2013, **21**, 114-126; (g) C. Zhao, C. A. Sojda, W. Myint and D. Seidel, Reductive etherification via anion-binding catalysis, *J. Am. Chem. Soc.* 2017, **139**, 10224-10227; (h) L. Sun, X. Wu, D.-C. Xiong and X.-S. Ye. Stereoselective Koenigs-Knorr glycosylation catalyzed by urea, *Angew. Chem. Int. Ed.* 2016, **55**, 8041-8044; (i) W. H. Pace, D.-L. Mo, T. W. Reidl, D. J. Wink and L. L. Anderson. Catalytic Asymmetric Synthesis of Dihydropyrido[1,2-a]indoles from Nitrones and Allenates. *Angew. Chem. Int. Ed.* 2016, **55**, 9183-9186; (j) S. Tortoioli, S. Bacchib, C. Tortoretoc, J. B. Strachand and A. Perboni. Chiral sulfamide-catalyzed asymmetric Michael addition of protected 3-hydroxypropanal to  $\beta$ -nitrostyrenes. *Tetrahedron Lett.* 2012, **53**, 1878-1881.
